# Supplementary material for: Association between heavy metals’exposure and depression: Findings of the NHANES from 2003 to 2020
Source: Research Square preprint supplement (doi:10.21203/rs.3.rs-7038470/v1), 2025-08-05
Supplement: Supplementary file 1 [file 16af98127908e085090ce159.docx]

***Supplementary materials***

**Graphical abstact**

**
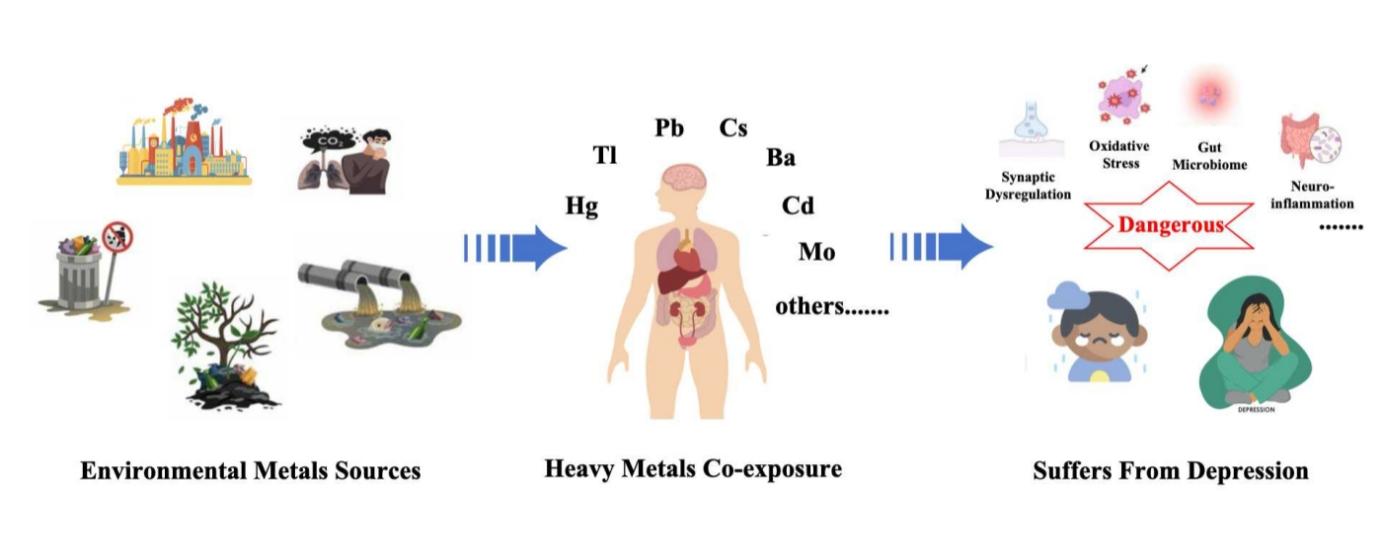
**

**Figure**

| 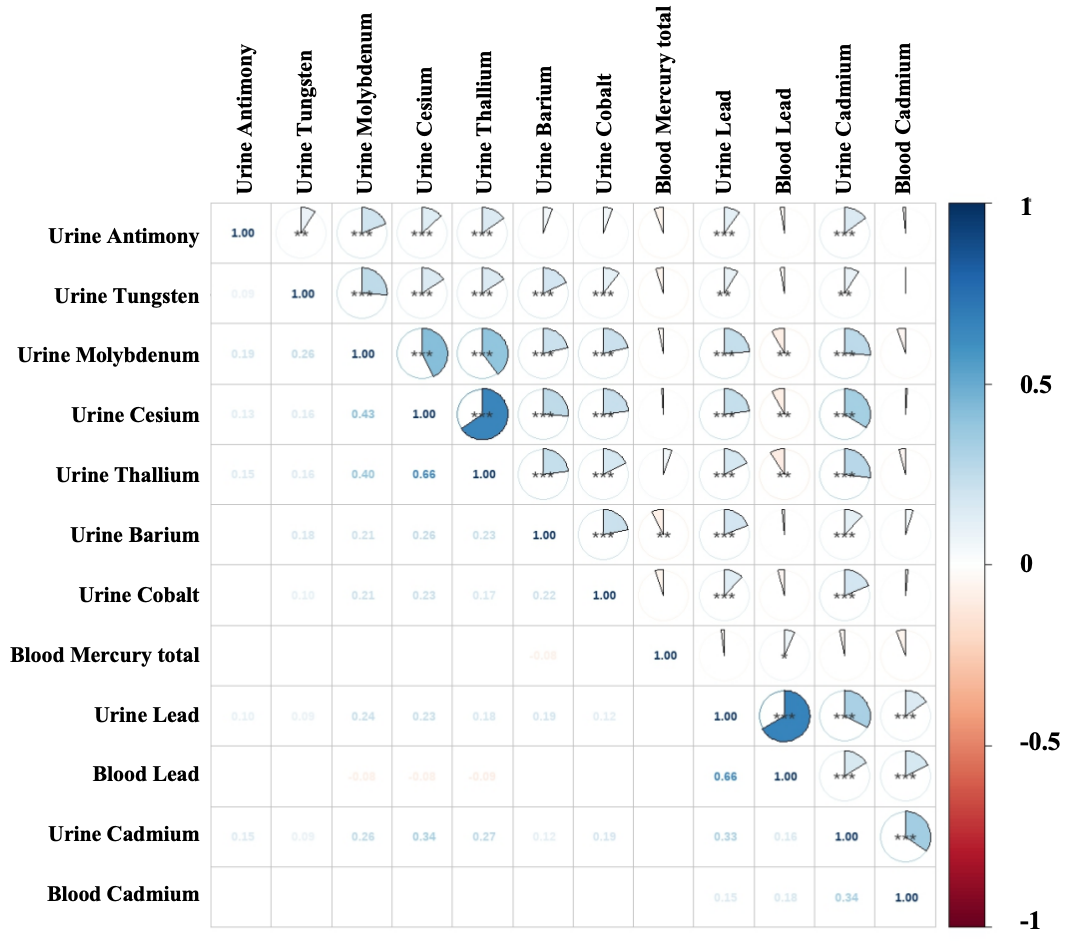 |
| --- |

Fig. S1 Pearson correlation coefficients between exposures to the 12 heavy metals. The variation in color intensity reflects the degree of correlation, where dark blue represents the highest positive correlation and dark red indicates the most substantial negative correlation. * p < 0.05; ** p < 0.01; *** p < 0.001.

**Tables**

**Table S1.** Joint effect of heavy metal mixtures on the prevalence of depression in the WQS model.

| Outcome | OR | 95% CI | *P*-value |
| --- | --- | --- | --- |
| Positive | | | |
| Crude model | 1.76 | 1.54-2.02 | ＜ 0.001 |
| Model I | 1.17 | 1.02-1.35 | 0.026 |
| Negative | | | |
| Crude model | 0.69 | 0.62-0.76 | ＜ 0.001 |
| Model I | 0.81 | 0.70-0.94 | 0.006 |

WQS, weighted quantile sum; OR: odds ratio; CI: confidence interval; The crude model was not adjusted for any covariates, while Model I was adjusted for all covariates.

**Table S2.** PIPs of each heavy metal for the prevalence of depression in BKMR model.

|  | PIPs |
| --- | --- |
| Barium_urine | 0.448 |
| Cobalt_urine | 0.382 |
| Antimony_urine | 0.186 |
| Tungsten_urine | 0.184 |
| Lead_urine | 0.158 |
| Cadmium_urine | 0.126 |
| Blood_cadmium | 0.114 |
| Blood_lead | 0.104 |
| Cesium_urine | 0.000 |
| Molybdenum_urine | 0.000 |
| Thallium_urine | 0.000 |
| Blood_mercury_total | 0.000 |

This model adjusted for all covariates. PIPs, posterior inclusion probabili probabilities; BKMR, Bayesian kernel machine regression.
