# Supplementary material for: Association between heavy metals’exposure and depression: Findings of the NHANES from 2003 to 2020
Source: Research Square preprint supplement (doi:10.21203/rs.3.rs-7038470/v1), 2025-08-05
Supplement: Supplementary file 2 [file 443bc8e805e244272af61deb.xlsx]

## Sheet: Sheet1
Respondent sequence number	Barium, urine (ug/L)	Cadmium, urine (ug/L)	Cobalt, urine (ug/L)	Cesium, urine (ug/L)	Molybdenum, urine (ug/L)	Lead, urine (ug/L)	Antimony, urine (ug/L)	Thallium, urine (ug/L)	Tungsten, urine (ug/L)	Blood cadmium (ug/L)	Blood lead (ug/dL)	Blood mercury, total (ug/L)	Chronic Kidney Disease	Coronary heart disease	Diabetes	Hypertension	Alcohol consumption	Age	Education Level	Gender	Marital Status	PIR	Race	Physical activity	BMI	Smoking Status	Depression
21043	0.51	0.04	0.2	3.49	49.9	0.38	0.14	0.27	0.12	0.1	0.9	0.3	1	0	1	1	1	31	2	1	1	3	4	3	62.77	3	0
21052	2.51	0.25	0.45	1.15	33.7	0.23	0.05	0.04	0.02	1	0.6	0.14	1	0	0	0	1	37	2	2	1	2	3	1	20.01	2	0
21085	0.8	0.18	0.12	2.04	56.5	1.87	0.05	0.08	0.06	0.6	9	0.7	1	0	0	0	1	26	2	1	2	3	1	3	26.62	3	0
21115	1.7	1.06	0.95	8.28	83	0.97	0.18	0.32	0.05	0.4	0.7	0.6	1	0	0	0	3	32	3	2	1	3	1	3	42.57	3	0
21116	2.28	0.42	1.33	7.87	59.9	1.14	0.09	0.33	0.04	0.3	1.4	0.2	1	0	0	0	1	38	3	2	1	2	1	3	37.82	2	0
21130	0.22	0.09	0.25	2.42	40.1	0.4	0.08	0.11	0.07	0.4	2.1	1.1	1	0	0	0	1	20	1	2	2	1	4	1	38.37	3	0
21195	0.22	0.05	0.09	1.23	8.9	0.54	0.05	0.04	0.03	0.2	6.5	0.6	1	0	0	0	1	26	3	1	2	3	1	2	26.37	2	0
21215	1.21	0.07	0.2	3.77	72.6	1.05	0.05	0.16	0.05	0.9	4.3	2	1	0	0	0	1	23	1	1	2	1	3	2	27.74	3	0
21221	2.14	0.14	0.2	7.38	87.7	0.23	0.23	0.24	0.27	0.1	0.6	0.6	1	0	0	1	1	23	2	1	2	2	1	3	28.47	3	0
21244	2.1	0.11	0.77	3.42	34	0.46	0.08	0.1	0.09	0.1	0.2	0.4	1	0	0	0	1	27	1	2	1	1	3	2	29.23	3	0
21256	0.53	0.19	0.32	11.55	66.4	0.72	0.15	0.43	0.07	0.3	1	0.9	1	0	0	0	1	27	3	1	2	2	1	2	27.63	1	0
21274	3.61	0.6	1.08	5.42	76.5	0.61	0.1	0.33	0.27	1.3	0.8	1.1	1	0	0	0	1	26	1	2	2	1	4	1	21.13	3	0
21325	2.05	0.32	0.35	8.26	91.2	0.87	0.07	0.28	0.09	0.2	1.6	3.3	1	0	0	0	1	32	1	1	1	1	3	2	31.56	3	0
21367	1.66	0.14	0.26	2.92	28.5	1.92	0.15	0.23	0.05	0.4	5.4	4.4	1	0	0	0	1	31	3	1	3	3	4	2	41.88	3	0
21431	1.15	0.06	0.1	2.86	16.7	0.23	0.09	0.07	0.03	0.3	0.4	1.5	1	0	0	0	1	24	1	2	1	2	3	2	30.17	3	1
21432	0.43	0.43	0.16	4.2	43.3	0.91	0.09	0.18	0.07	1	2.9	0.4	1	0	0	0	1	30	2	1	2	2	4	2	27.83	1	1
21483	3.15	0.25	0.24	5.77	72.1	0.56	0.05	0.28	0.05	0.1	0.5	1.2	1	0	0	0	1	27	1	2	1	1	3	2	26.55	2	0
21527	1.73	0.49	0.71	3.2	26.6	0.6	0.05	0.16	0.63	0.3	1.1	0.5	1	0	0	1	3	35	1	2	1	3	1	3	34.18	3	0
21534	1.68	0.21	0.4	7.42	127.9	0.99	0.09	0.3	0.11	0.2	1.2	1.3	1	0	0	0	1	31	1	1	1	2	1	3	35.53	1	0
21645	1.52	0.42	0.42	3.21	102.5	2.14	0.33	0.11	0.11	0.8	2.8	1.4	1	0	0	0	2	39	2	1	1	1	4	2	28.08	1	0
21690	2.94	0.14	0.35	2.58	30.8	0.56	0.17	0.1	0.08	0.3	0.6	0.14	1	0	0	0	3	26	2	1	2	2	3	3	26.51	1	0
21740	0.36	0.19	0.1	1.97	20.4	0.23	0.1	0.1	0.02	0.1	0.8	0.8	1	0	0	0	3	32	2	1	2	3	3	2	29.18	3	0
21783	3.17	0.26	0.21	5.3	116.2	0.68	0.05	0.19	0.45	0.1	1.1	0.7	1	0	0	0	3	37	1	1	2	2	4	1	27.66	3	0
21824	0.58	0.1	0.18	7.08	23	0.23	0.05	0.19	0.05	0.3	0.5	2.2	1	0	0	0	3	32	1	1	1	1	3	1	21.53	3	0
21845	0.84	0.09	0.15	2.68	22.2	0.23	0.05	0.07	0.02	0.3	1.2	3.9	1	0	0	0	1	32	1	1	1	1	3	2	28.58	3	0
21862	0.43	0.17	0.13	2.69	54.8	0.37	0.05	0.16	0.12	0.7	1.3	0.3	1	0	1	0	1	33	1	2	3	2	3	1	39.46	2	1
21927	2.12	0.14	0.8	3.09	30.7	0.95	0.05	0.09	0.08	0.3	3.2	0.14	1	0	0	0	3	23	1	2	1	2	1	3	26.11	3	0
22068	0.84	0.06	0.24	2.25	32.2	0.71	0.09	0.09	0.02	0.2	0.8	0.7	1	0	0	1	2	33	2	2	1	1	3	2	37.48	3	1
22111	0.67	0.12	0.22	6.67	230.1	0.43	0.19	0.14	0.06	0.1	1.1	3.3	1	0	0	0	1	35	3	1	1	2	2	1	23.12	3	0
22131	1.41	0.12	0.7	4.33	43.2	0.23	0.05	0.28	0.02	0.3	0.2	0.1	1	0	0	0	1	27	1	2	1	1	3	1	24.68	3	0
22176	0.63	0.03	0.23	2.5	37	0.61	0.18	0.13	0.11	0.1	0.9	1.6	1	0	0	0	1	35	1	1	1	1	4	1	27.31	3	0
22179	0.89	0.36	0.8	4	25.4	0.7	0.15	0.11	0.12	0.3	1.2	2.4	1	0	0	0	3	35	3	2	2	3	4	3	33.68	3	0
22348	0.59	0.16	0.06	1.78	3.5	0.23	0.07	0.05	0.02	0.2	1.1	3.9	1	0	0	0	2	24	1	1	2	2	2	1	25.25	3	0
22358	2.75	0.05	0.26	2.53	11.3	0.49	0.05	0.07	0.04	0.1	1.7	0.9	1	0	0	0	1	21	2	1	2	2	3	1	54.38	1	0
22391	3.13	0.27	0.43	5.25	51.4	1.32	0.23	0.28	0.12	1	2	1.9	1	0	0	0	1	29	1	1	2	2	4	1	20.49	1	0
22443	0.85	1.25	0.45	6.3	90.5	1.56	0.12	0.41	0.12	2.1	1.3	1.3	1	0	0	0	1	38	1	2	2	1	3	1	23.09	1	0
22460	4.64	0.08	0.48	9.3	73.8	0.54	0.05	0.26	3.49	0.1	0.9	1	1	0	0	0	1	20	1	1	2	3	3	1	24.92	3	0
22467	2.98	0.06	0.32	3.59	48.5	0.78	0.09	0.1	0.02	0.5	1.7	0.4	1	0	0	0	1	20	3	1	2	2	4	1	22.43	1	0
22485	1.73	0.12	0.38	7.09	32.3	0.38	0.12	0.16	0.02	0.2	0.7	1	1	0	0	0	3	20	2	2	2	1	3	3	24.38	3	0
22515	10.01	0.58	2.18	8.46	76.1	2.46	0.33	0.18	0.15	0.7	1.7	0.4	1	0	0	0	1	20	3	2	2	3	1	3	23.46	1	0
22545	6.83	0.16	0.7	3.74	51.8	0.36	0.09	0.17	0.08	0.4	0.8	0.7	1	0	0	0	1	24	1	2	1	2	3	1	35.23	3	0
22547	0.59	0.17	0.35	7.38	115.1	2.21	0.18	0.17	0.03	0.2	2.7	0.9	1	0	0	0	2	28	2	1	2	2	1	1	22.85	3	0
22561	0.5	0.35	0.77	2.85	22.8	0.38	0.05	0.12	0.05	0.6	1.6	0.9	1	1	0	1	3	37	1	2	1	1	4	1	39.51	3	0
22586	0.56	0.07	0.09	0.77	20.6	0.23	0.05	0.02	0.02	0.1	0.6	0.6	1	0	0	0	1	32	1	2	2	1	3	2	19.59	3	0
22622	2.16	0.13	0.8	2.26	10.8	0.23	0.05	0.11	0.03	0.5	1	0.3	1	0	0	0	3	38	1	2	1	2	3	3	37.81	3	0
22690	3.1	0.29	0.57	10.5	37.2	1.64	0.17	0.2	0.03	0.1	0.7	1.1	1	0	0	1	1	29	3	2	1	1	3	2	38.39	3	0
22691	1.34	0.27	0.31	9.63	89.2	1.12	0.09	0.51	0.27	1.2	1.8	2.9	1	0	0	1	2	36	2	1	2	1	4	1	32.7	3	0
22718	2.64	0.11	0.3	5.51	71.6	0.53	0.23	0.29	0.08	0.5	1.7	0.4	1	0	0	0	1	20	2	1	2	1	4	1	34.51	3	0
22748	13.72	0.2	0.57	7.07	65.6	0.86	0.1	0.22	0.08	0.1	1.7	4.6	1	0	0	0	1	36	1	1	2	3	3	3	25.63	3	0
22756	1.2	0.53	0.29	4.2	22.6	1.08	0.16	0.27	0.12	1	1.9	1.2	1	0	0	1	2	28	3	2	3	3	4	3	38.04	1	0
22758	2.19	0.37	0.64	7.58	62	1.07	0.18	0.34	0.1	0.1	0.8	1.7	1	0	0	0	1	35	1	2	1	1	3	1	22.05	2	0
22786	1.73	0.39	0.2	6.52	42.2	0.84	0.12	0.14	0.07	0.3	1.4	1.6	1	0	0	1	2	38	2	2	1	1	1	2	25.2	3	0
22808	1.52	0.51	1.36	7.51	39.7	0.91	0.23	0.31	0.11	0.4	1.7	0.4	1	0	0	0	1	39	3	2	2	3	3	1	20.58	3	1
22910	8.9	0.6	0.93	8.55	97.2	2.15	0.29	0.36	0.65	0.2	0.9	1.3	1	0	0	1	1	22	2	2	2	2	4	2	43.79	2	0
22918	2.35	1.27	1.08	22.98	41.6	1.08	0.13	0.32	0.04	0.7	1.4	0.6	1	1	0	0	2	35	2	2	1	2	3	3	42.24	1	0
22922	12.69	0.34	2.03	9.27	52.5	1.91	0.37	0.24	0.15	0.5	0.8	0.7	1	0	0	0	2	22	3	2	2	3	3	2	32.62	3	0
22939	2.56	0.17	0.6	6.24	110.8	1.24	0.09	0.14	0.12	0.2	1.6	1.4	1	0	0	0	3	32	1	2	1	1	4	2	22.67	3	0
22959	2.43	0.27	0.22	6.51	43.2	0.23	0.1	0.16	0.02	0.4	0.5	7.5	1	0	0	0	1	31	1	2	1	1	3	1	23.97	3	0
22969	1.32	0.21	0.36	6.26	49.8	0.73	0.17	0.33	0.17	0.1	0.4	3	1	0	0	1	2	35	1	2	1	2	4	2	47.55	3	1
23011	0.96	0.06	0.15	5.53	35.4	0.37	0.05	0.2	0.04	0.1	0.8	2.1	1	0	0	0	1	21	1	1	2	3	3	1	22.04	3	0
23066	0.65	0.29	0.4	5.68	77.8	0.44	0.23	0.51	0.02	0.6	0.6	0.5	1	0	0	0	1	21	3	2	1	2	3	2	33.03	1	0
23110	0.7	0.14	0.19	4.07	56.5	0.53	0.05	0.11	0.04	0.2	1.5	0.5	1	0	0	1	1	38	1	1	1	1	3	1	32.92	3	0
23177	1.03	0.1	0.29	4.54	63.6	0.77	0.05	0.18	0.02	0.3	1.8	1.9	1	0	0	0	1	34	3	2	1	2	1	3	29.29	3	0
23192	1.68	0.12	0.31	2.93	33.5	0.23	0.05	0.1	2.93	0.3	0.5	0.5	1	0	0	0	3	21	1	2	2	3	1	1	22.18	3	0
23196	1.91	0.17	0.47	5.44	102	1.09	0.1	0.1	0.13	0.1	0.9	1.8	1	0	0	0	3	36	2	2	1	3	4	3	28	3	0
23248	1.39	0.19	0.35	2.45	47.3	1.03	0.16	0.08	0.08	1.6	1.3	0.5	0	0	0	0	3	24	3	1	3	3	3	2	19.54	1	0
23272	5.29	0.3	0.35	7.05	66	1.24	0.17	0.34	0.02	0.1	1.5	0.3	1	0	0	0	1	23	2	1	2	2	1	2	29.31	3	0
23309	3.12	0.24	0.28	3.72	46.9	0.61	0.12	0.16	0.04	0.3	1.2	0.4	1	0	0	0	1	25	1	1	2	1	3	1	25.84	3	0
23311	1.05	0.35	0.9	7.17	59.4	1.53	0.08	0.25	0.07	0.3	1.5	1.6	1	0	0	0	3	35	1	2	1	1	4	2	19.81	3	0
23359	1.08	0.17	0.27	11.04	39.6	0.38	0.05	0.15	0.04	0.4	0.9	1.4	1	0	0	0	1	25	1	2	1	1	5	3	19.72	3	0
23420	0.76	0.5	1.11	13.28	34.9	2.19	0.05	0.36	0.02	0.4	2.1	1.9	1	0	0	0	3	29	3	2	1	2	1	1	26.1	3	0
23442	2	0.19	0.56	5.25	41.7	0.75	0.05	0.27	0.12	0.1	0.8	0.9	1	0	0	0	3	27	1	2	2	1	4	1	25.17	3	0
23480	3.9	0.03	0.41	1.85	13	0.41	0.05	0.06	0.04	0.3	0.8	0.5	1	0	0	1	1	36	1	2	2	1	1	3	30.46	3	0
23495	5.12	0.06	0.2	2.94	15.5	0.23	0.05	0.09	0.02	0.1	1.4	0.14	1	0	0	0	1	30	2	1	1	1	3	1	23.39	1	0
23558	4.48	0.06	0.34	3.1	21.6	0.41	0.05	0.1	0.03	0.4	0.9	0.5	1	0	0	0	1	22	2	2	2	3	3	1	24.65	2	0
23615	0.22	0.07	0.06	1.33	12.3	0.23	0.05	0.06	0.02	0.3	1.8	1.8	1	0	0	0	1	31	1	1	1	1	4	2	28.36	3	0
23647	2.95	0.56	0.68	8.34	62.4	1.52	0.28	0.18	0.13	1.1	1.4	1.1	1	0	0	0	1	37	1	2	1	1	3	3	27.23	1	0
23747	2.59	0.16	0.26	5.77	35.5	0.34	0.05	0.28	0.02	0.2	1	2	1	0	0	0	1	30	2	1	1	2	1	1	30.28	1	0
23782	0.55	0.03	0.06	0.69	2.5	0.23	0.05	0.011	0.02	1.6	1.5	1.2	1	0	0	0	1	31	1	1	1	1	3	1	23.59	1	0
23785	0.84	0.03	0.47	2.2	18.3	0.23	0.05	0.11	0.02	0.1	0.7	1.9	1	0	0	0	1	32	1	2	1	2	3	2	30.72	2	0
23807	0.22	0.06	0.08	1.11	7.9	0.23	0.08	0.05	0.02	0.1	1.6	0.4	1	0	0	0	3	34	3	2	1	3	1	3	29.86	3	0
23836	0.72	0.03	0.06	1.2	7.9	0.23	0.05	0.09	0.02	2.6	0.9	0.4	1	0	0	0	1	28	1	1	3	2	3	2	36.84	1	0
23912	0.22	0.07	0.08	2.21	26.3	0.23	0.05	0.07	0.02	0.2	0.9	0.7	1	0	0	0	1	25	1	2	1	1	3	1	21.6	3	0
23935	0.22	0.19	0.06	0.78	10.5	0.23	0.05	0.04	0.02	1.8	2.6	2.5	1	0	0	1	1	31	2	1	2	2	4	1	34.59	1	1
23961	2.11	0.51	0.48	11.18	61.8	0.73	0.15	0.31	0.41	0.5	1	0.6	1	0	0	0	1	39	3	2	1	1	3	3	24.25	1	0
24049	0.68	0.23	0.4	6.93	143.7	0.35	0.05	0.36	0.2	0.2	0.7	2.3	1	0	0	0	1	23	1	2	2	1	4	1	24.89	3	0
24066	1.16	0.08	0.41	1.2	20.3	0.23	0.05	0.04	0.02	0.2	0.7	1	1	0	0	0	2	27	1	2	1	1	3	2	25.98	2	0
24077	1.74	0.33	0.41	7.25	73.2	0.62	0.13	0.34	0.11	0.3	0.9	1.2	1	0	0	0	1	22	3	1	2	3	4	1	24.91	3	0
24089	0.49	0.17	0.39	9.6	72.2	0.54	0.05	0.39	0.06	0.3	0.6	1.2	1	0	0	0	1	24	1	2	3	2	3	1	25.72	1	0
24091	10.67	0.15	0.75	5.49	103.3	0.72	0.12	0.22	0.26	0.1	0.4	0.6	1	0	0	0	1	27	1	2	1	1	3	2	21.68	3	0
24171	3.9	0.11	0.27	4.98	45.2	0.81	0.14	0.15	0.03	0.2	1.7	0.2	1	0	0	0	1	25	2	1	2	2	4	3	41.72	3	0
24177	2.45	0.08	0.22	9.17	35	1.16	0.08	0.19	0.04	0.3	3.7	5.9	1	0	0	0	1	27	2	1	1	2	1	3	40.87	2	0
24185	4.12	0.42	0.77	8.98	114.3	1.46	0.29	0.46	0.28	1.1	2.6	0.6	1	0	0	0	1	21	1	1	2	3	4	1	19.25	1	0
24197	22.61	0.2	0.36	3.75	50.9	0.81	0.05	0.17	0.04	0.1	1.9	0.6	1	0	0	1	1	37	2	1	1	2	3	2	30.15	2	0
24229	1.32	0.29	0.43	8.34	71.5	1.31	0.1	0.34	0.17	0.3	1.8	3.3	1	0	0	0	1	34	3	1	1	1	1	1	28.15	3	0
24234	2.83	0.1	1.33	8.57	52.4	1.05	0.12	0.27	0.1	0.2	0.7	0.4	1	0	0	0	1	20	2	2	2	1	3	2	24.4	2	0
24244	0.83	0.08	0.06	1.29	3.3	0.4	0.05	0.04	0.02	1.4	3.1	0.1	1	0	0	0	3	31	3	1	2	2	5	2	29.44	3	0
24309	1.69	1.45	0.71	7.4	82.2	1.3	0.16	0.21	0.05	0.4	1.3	0.8	1	0	0	0	3	38	3	2	3	1	1	2	33.47	3	1
24319	0.39	0.03	0.45	1.26	34	1.69	0.05	0.05	0.02	0.3	4.8	0.14	1	0	0	0	3	21	1	2	1	3	1	3	30.59	3	0
24377	3.31	0.57	0.41	5.24	78.5	0.41	0.12	0.16	0.1	0.1	0.7	1.4	1	0	0	0	1	30	2	2	1	2	4	1	46.16	3	0
24384	2.5	0.56	0.4	12.51	79.2	1.68	0.08	0.43	0.04	0.2	0.7	1.6	1	0	0	0	1	31	1	2	3	1	5	2	30.71	3	0
24389	0.51	0.76	0.45	7.6	116.7	0.91	0.1	0.29	0.07	0.4	1.4	1.2	1	0	0	1	2	30	1	1	2	1	4	1	29.81	3	0
24392	0.22	0.06	0.1	1.6	8.4	0.44	0.05	0.06	0.02	0.4	4.3	3.1	1	0	0	0	1	25	1	2	2	2	3	1	19.94	1	0
24441	1.24	0.04	0.16	4.33	48.52	0.23	0.05	0.21	0.07	0.1	1.3	2	1	0	0	0	1	35	1	1	1	1	3	1	33.75	2	0
24445	2.48	0.56	0.34	12.95	62.8	0.57	0.21	0.36	0.07	0.1	1.3	6.1	1	0	0	0	1	29	1	2	2	2	3	2	22.12	3	0
24572	0.22	0.15	0.23	3.42	9.8	0.58	0.13	0.17	0.02	0.1	0.5	1.1	1	0	0	0	1	31	2	2	1	2	3	1	22.14	3	0
24630	1.45	0.21	0.37	20.64	237.2	0.93	0.05	0.27	0.41	0.4	0.9	2.8	1	0	0	0	1	23	1	2	2	2	2	1	31.38	1	0
24631	2.68	0.65	0.41	10.46	154.8	1.73	0.12	0.21	0.15	1.1	1.8	1.4	1	0	0	0	1	38	1	1	1	3	4	1	33.1	1	0
24649	0.45	0.3	0.18	4.22	30.2	0.66	0.09	0.13	0.02	0.2	1.1	0.9	1	0	0	0	3	33	2	2	2	2	4	1	31.91	3	0
24672	4.33	0.17	0.28	2.55	69.2	0.47	0.16	0.08	0.14	2.4	1.6	1.2	1	0	0	0	1	37	3	1	1	2	3	3	22.64	1	1
24720	8.72	0.19	1.48	4.97	71.3	1.15	0.05	0.14	0.06	0.3	0.6	0.14	1	0	0	0	1	24	1	2	3	1	3	2	26.61	2	0
24762	3.28	0.27	0.19	5.59	55.8	0.76	0.08	0.25	0.02	0.2	1.9	1	1	0	0	0	1	32	2	1	1	2	1	1	27.34	2	0
24789	0.75	0.15	0.33	8.9	45.7	0.68	0.05	0.19	0.05	0.4	2	0.3	1	0	0	0	1	29	2	1	3	3	1	3	32.2	1	0
24805	2.42	0.84	0.51	7	36.7	0.68	0.09	0.24	0.03	0.5	0.7	0.9	1	0	0	0	1	39	1	2	1	1	3	1	32.23	3	0
24809	1.21	0.62	0.17	5.83	37.2	0.61	0.07	0.15	0.05	0.6	2.1	0.5	1	0	0	0	1	37	1	1	1	1	3	2	24.81	1	0
24826	5.82	0.46	0.52	6.84	134.8	0.81	0.17	0.28	0.17	0.1	1	1.7	1	0	0	0	3	36	2	1	2	1	4	3	30.25	3	0
24881	0.47	0.27	2.25	5.26	67.3	1.73	0.05	0.35	0.06	0.5	2.3	0.5	1	0	0	0	1	32	3	2	1	2	1	3	31.76	3	0
24908	0.72	0.04	0.09	1.5	14	0.23	0.05	0.05	0.06	0.1	1.4	2	1	0	0	0	1	34	1	2	1	1	3	2	23.83	3	0
24922	0.22	0.04	0.64	1.29	19.3	0.53	0.05	0.07	0.05	0.1	1.2	30.7	1	0	0	0	3	20	3	2	1	2	1	2	31.68	3	0
24962	1.95	0.03	0.06	0.95	5.6	0.23	0.05	0.02	0.02	0.4	0.6	0.6	1	0	0	0	1	28	1	2	1	1	3	2	16.54	1	1
24982	1.83	0.99	1.36	10.23	110.2	1.74	0.53	0.45	0.06	0.4	1.8	0.9	1	0	0	0	1	29	2	2	2	2	1	3	25.16	1	0
24984	1.44	0.25	0.47	12.66	162.3	2.66	0.18	0.32	0.23	0.3	2.8	0.14	1	0	0	1	1	30	3	1	1	2	1	3	23.04	1	0
24997	7.16	0.23	0.3	12.71	78.8	0.62	0.7	0.38	0.11	0.1	1.2	1.1	1	0	0	0	2	35	1	1	2	1	3	2	27.98	3	0
25014	0.85	0.34	0.27	4.68	60.3	0.23	0.08	0.21	0.02	0.1	0.8	0.3	1	0	0	0	1	33	3	1	1	2	4	1	56.11	3	0
25022	0.65	0.47	1.79	8.79	40.3	1	0.17	0.44	0.03	0.4	1.3	0.7	1	0	0	1	1	34	3	2	2	3	4	2	29.72	2	0
25055	3.74	0.21	0.6	5.37	52	0.44	0.1	0.26	0.09	0.3	0.4	0.5	1	0	0	0	1	25	1	2	2	2	4	1	32.25	3	0
25063	4.12	0.2	0.9	4.49	71.6	0.23	0.1	0.19	0.02	0.1	0.7	0.1	1	0	0	0	2	35	1	2	1	3	3	3	23.88	3	0
25085	1.44	0.03	0.46	3.25	32.7	0.8	0.05	0.13	0.02	0.1	1.5	0.5	1	0	0	0	1	21	1	2	2	2	1	3	27.93	3	0
25105	1.28	1.43	0.54	3.35	79.1	2.02	1.28	0.1	0.78	2.5	3.7	1.4	1	0	0	0	1	36	2	1	2	3	4	1	21.26	1	0
25114	2.35	0.23	0.41	3	27.1	1.07	0.05	0.14	0.11	0.1	1.4	0.7	1	0	0	0	3	28	3	2	1	2	1	3	27.42	3	0
25174	1.8	0.22	0.52	7.37	57.6	0.78	0.05	0.33	0.08	0.2	1.1	1.7	1	0	0	0	1	25	1	1	2	3	4	1	19.73	3	0
25263	0.48	0.56	0.9	26.54	72.5	2.37	0.19	0.45	0.06	0.7	6.1	0.9	1	0	0	0	3	20	3	2	1	3	1	3	23.68	3	0
25265	1.22	0.18	0.14	5.01	21.8	0.38	0.08	0.24	0.23	0.1	0.8	2	1	0	0	0	3	23	2	1	2	1	4	3	22.86	3	0
25286	2.06	0.17	0.42	2.83	40.4	0.5	0.14	0.11	0.02	0.1	0.9	0.5	1	0	0	0	3	23	1	2	2	1	4	3	34.12	3	0
25356	4.43	0.28	1.08	4.79	60.3	0.54	0.52	0.11	0.12	0.3	0.6	1.4	1	0	0	0	1	25	2	2	2	2	3	2	18.72	1	0
25390	3.46	0.03	0.06	1.04	7.5	0.23	0.05	0.04	0.02	0.2	0.6	0.14	1	0	0	1	1	28	1	2	1	2	3	2	22.43	2	0
25392	3.28	1.45	0.64	9.01	65.7	1.26	0.12	0.14	0.03	1.2	1.7	0.2	1	0	0	0	1	37	1	2	3	2	3	3	27.2	1	0
25407	0.35	0.07	0.08	2.58	21.8	0.23	0.05	0.07	0.1	0.4	0.4	0.4	1	0	0	0	2	34	1	2	1	1	3	2	22.08	3	0
25412	3.91	0.14	0.32	2.9	28	0.57	0.05	0.11	0.05	0.3	1	1.5	1	0	0	0	2	31	1	2	1	1	3	2	39.22	2	0
25415	1.79	0.19	0.4	8.97	70.1	3.41	0.12	0.37	0.12	0.5	7.2	0.3	1	0	0	0	1	28	2	1	3	2	3	2	29.73	1	0
25439	1.41	0.33	0.44	6.95	84.1	2.4	0.27	0.26	0.1	0.3	3	0.2	1	0	0	0	1	25	3	1	2	2	1	3	22.24	2	0
25441	7.67	0.32	1.17	3.4	57.6	0.99	0.12	0.17	0.1	0.4	1.4	0.1	0	0	0	0	1	20	2	2	2	3	1	2	25.76	2	0
25445	3.83	0.26	0.4	7.37	66	0.49	0.08	0.31	0.06	0.2	1.1	2.3	1	0	0	1	2	36	1	1	1	1	3	2	45.1	2	0
25447	1.34	0.08	0.44	2.42	15.9	0.23	0.05	0.15	0.02	0.2	0.5	1	1	0	0	0	1	32	1	2	1	1	3	1	27.39	3	0
25462	0.22	0.45	0.14	5.36	21.6	0.23	0.05	0.12	0.02	0.1	0.9	0.9	1	0	0	0	1	34	2	2	1	1	3	1	22.96	3	0
25473	1.89	0.26	0.66	5.28	72	0.52	0.05	0.23	0.02	0.4	0.6	2.4	1	0	0	0	1	20	1	2	2	1	5	3	19.19	3	0
25493	2.54	0.08	0.39	3.31	58.5	0.37	0.13	0.13	0.08	0.4	1.1	0.9	1	0	0	0	1	24	1	2	2	2	4	1	23.32	3	0
25551	2.09	0.26	0.57	4.17	52	1.1	0.05	0.23	0.24	0.5	2.2	0.8	1	0	0	0	3	32	2	2	1	3	1	2	24.46	3	0
25586	3.86	0.21	0.36	8.06	41.6	0.59	0.12	0.28	0.14	0.1	0.7	0.5	1	0	0	0	1	26	2	2	1	1	3	3	28.45	3	0
25694	1.53	0.42	0.51	9.3	150.1	1.45	0.24	0.34	0.3	0.3	1.4	0.7	1	0	0	0	3	21	1	1	3	2	4	3	32.04	3	0
25698	3.77	0.27	0.46	8.7	114.4	0.66	0.19	0.43	0.16	0.1	0.5	0.3	1	0	0	0	1	31	2	2	1	2	3	2	25.68	3	0
25756	1.7	0.13	0.24	4.35	35.9	0.6	0.12	0.15	0.09	0.1	1.2	1	1	0	0	0	2	22	1	1	2	1	4	2	18.67	3	0
25827	1.01	0.07	0.26	2.27	3.1	0.34	0.05	0.12	0.02	0.5	1.6	1.8	1	0	0	0	1	38	1	2	1	1	1	2	27.68	3	0
25842	2.93	0.15	0.44	10.71	111.7	1.8	0.38	0.34	0.44	0.3	3	0.8	1	0	0	0	1	21	2	1	2	3	1	1	19.33	2	0
25859	0.22	0.04	0.06	0.59	8.9	0.23	0.05	0.03	0.02	0.2	3.8	0.4	1	0	0	0	3	25	2	1	1	1	3	1	27.35	3	0
25869	1.08	0.17	0.33	1.34	10.4	0.69	0.09	0.05	0.08	0.5	1.6	1.5	1	0	0	0	1	38	1	2	1	2	3	3	34.17	1	0
25950	0.36	0.04	0.06	2.14	9.9	0.23	0.05	0.1	0.02	0.2	1.2	1.7	1	0	0	0	1	26	3	1	2	2	2	1	29.03	3	0
26004	2.9	0.29	0.38	4.11	111.1	1.24	0.29	0.19	0.12	0.3	1.2	0.2	1	0	0	0	1	21	1	1	2	3	4	2	24.37	3	0
26007	1.66	0.31	0.5	4.89	113.3	0.34	0.07	0.3	0.11	0.1	0.5	0.3	1	0	0	0	1	24	2	2	3	2	1	2	17.6	2	0
26061	0.57	0.31	0.28	2.35	22.2	0.46	0.11	0.12	0.1	0.9	1.1	0.5	1	0	0	1	1	31	1	2	2	2	4	2	42.51	1	0
26096	0.93	0.16	0.36	4.13	43.9	0.56	0.07	0.3	0.04	0.1	1.6	0.7	1	0	0	1	2	27	1	1	3	1	3	1	28.12	3	0
26154	0.22	0.08	0.06	5.52	19.1	0.23	0.05	0.17	0.05	0.3	0.9	0.6	1	0	0	0	1	25	1	2	2	2	3	1	18.91	1	0
26209	1.29	0.21	0.47	11.29	97.3	1.1	0.11	0.34	0.02	0.1	0.6	0.5	1	0	0	0	1	29	2	2	1	3	1	2	42.54	3	0
26212	1.61	0.99	2.26	7.12	72.5	0.62	0.18	0.41	0.21	0.4	1.2	0.5	1	0	0	1	1	30	1	2	2	3	4	3	35.76	3	0
26229	2.03	0.24	0.28	6.17	69.7	1.28	0.17	0.31	0.05	0.3	2.1	0.8	1	0	0	0	1	26	3	1	1	2	1	3	27.29	3	0
26250	0.45	0.32	0.2	7.06	156.9	0.47	0.12	0.32	0.03	0.1	1.3	1.8	1	0	0	1	2	36	1	1	1	1	4	1	23.33	3	0
26299	3.54	0.56	0.39	9.05	139	1.41	0.29	0.33	0.09	0.1	1.6	0.8	1	0	0	0	2	27	2	1	2	2	3	3	23.58	3	0
26310	2.44	0.15	0.4	9.86	65.1	0.49	0.05	0.29	0.05	0.1	0.7	2.1	1	0	0	0	1	31	1	2	1	1	3	1	26.4	3	0
26368	1.78	0.3	0.52	2.6	43.2	0.58	0.07	0.1	0.31	0.5	1.3	1.6	1	0	0	0	2	31	3	1	1	2	4	1	36.05	3	1
26375	1.46	0.09	0.09	0.92	9.7	0.54	0.05	0.1	0.02	0.3	2	0.4	1	0	0	1	3	36	3	2	1	3	3	3	34.19	3	0
26401	0.63	0.27	0.18	1.72	24.9	0.54	0.08	0.07	0.08	1.7	0.9	0.6	1	0	0	0	1	31	1	2	1	1	3	1	24.45	1	0
26441	5.42	0.16	0.29	3.82	13.6	0.66	0.15	0.23	0.02	0.3	1.2	0.3	1	0	0	0	1	27	1	1	2	1	3	1	27.47	3	0
26493	0.63	0.06	0.27	1.01	4.6	0.23	0.05	0.04	0.02	0.3	1.4	1.9	1	0	0	0	2	36	2	2	2	2	4	3	30.45	3	0
26525	3.47	0.18	0.69	3.84	159.8	0.4	0.05	0.16	0.1	1.3	0.9	0.9	1	0	0	1	1	21	2	2	2	1	3	1	25.47	1	1
26579	0.89	0.11	0.42	5.67	85.2	2.84	0.28	0.15	0.24	1.1	2.4	0.3	1	0	0	0	1	20	2	1	1	3	3	3	19.16	1	0
26580	1.09	0.55	0.38	6.4	83.6	0.81	0.07	0.39	0.13	0.5	1.1	4.5	1	0	0	1	1	25	2	1	2	1	5	1	33.94	1	0
26684	4.05	0.08	0.21	2.82	16.7	1.84	0.13	0.14	0.02	0.5	4.8	0.5	1	0	0	0	1	39	2	1	1	2	3	2	28.41	1	0
26752	0.33	0.07	0.1	1.79	20.3	0.23	0.05	0.07	0.02	0.1	0.6	0.6	1	0	0	0	1	37	1	2	1	2	1	3	22.15	3	0
26756	0.48	0.38	0.25	6.46	48.9	0.44	0.07	0.23	0.11	0.2	0.6	0.8	1	0	0	0	1	24	1	2	2	3	4	3	46.92	3	0
26771	1.42	0.21	0.22	5.03	109.7	0.34	0.14	0.21	0.07	0.2	0.8	0.8	1	0	0	0	1	25	1	1	3	2	3	2	25.53	1	0
26821	0.75	0.18	0.14	5.71	42.1	0.48	0.14	0.12	0.04	0.4	1.8	0.14	1	0	0	0	1	26	1	1	3	1	3	2	23.65	1	0
26952	3.21	0.22	0.3	7.78	65	2.91	0.27	0.25	0.27	0.1	3.6	2.5	1	0	0	1	1	30	2	1	1	1	4	3	31.78	2	0
26984	4.71	0.41	0.79	19.1	137.4	0.91	0.37	0.37	0.08	0.1	0.4	1	1	0	0	0	1	34	1	2	1	1	3	3	34.64	3	0
26994	1.36	1.84	1.01	7.34	96.3	2.38	0.25	0.37	0.13	0.8	1.7	0.5	1	0	0	1	1	30	2	2	1	3	4	3	42.46	1	0
26995	1.67	0.63	0.89	11.82	102.6	1.81	0.12	0.74	2.86	0.4	1.2	1.2	1	0	0	0	3	30	2	2	2	3	4	3	28.33	3	0
26997	0.48	0.16	0.09	2.79	7.6	0.23	0.11	0.09	0.05	3.1	1.5	0.14	1	0	0	0	1	28	1	2	2	3	3	3	28.43	1	0
27007	2.71	0.23	1.1	6.1	37	0.47	0.1	0.33	0.16	0.3	0.6	0.7	1	0	0	0	2	33	1	2	1	2	1	3	29.46	3	0
27017	0.34	0.03	0.1	1.15	8.6	0.23	0.05	0.04	0.02	0.3	1	0.5	1	0	1	0	1	39	3	1	2	3	2	1	20.24	2	0
27117	1.35	1.52	0.48	8.88	84.6	0.85	0.19	0.39	0.08	0.1	0.7	7.8	1	0	0	0	2	30	1	2	3	2	4	1	32.13	3	0
27182	0.67	0.37	0.28	6.09	84.7	1.09	0.14	0.2	0.09	0.8	2	0.14	1	0	0	0	2	32	3	1	1	3	1	2	24.36	1	0
27187	0.45	0.2	0.06	4.88	25.9	0.23	0.05	0.15	0.02	1.1	1.6	5.6	1	0	0	0	2	31	3	1	1	2	5	2	25.85	3	0
27216	1.64	0.53	0.42	3.53	65	0.23	0.07	0.16	0.03	0.3	0.7	2.4	1	0	0	0	1	27	1	2	2	2	2	1	26.95	3	0
27256	1.25	0.08	0.21	0.99	9.9	0.38	0.09	0.03	0.02	0.3	1.3	1	1	0	0	0	3	29	3	2	1	2	1	3	28.6	3	0
27303	3.88	0.16	1.9	7.26	65.2	0.94	0.12	0.22	0.14	0.2	0.5	0.14	1	0	0	0	1	31	1	2	1	3	3	1	39.55	3	0
27341	2.41	0.22	0.3	2.79	21.5	0.81	0.17	0.16	0.11	0.3	2.1	0.3	1	0	1	0	1	26	3	1	1	1	1	3	29.09	2	0
27343	2.78	0.69	0.46	10.17	118.4	1.14	0.11	0.63	0.32	0.3	0.7	0.8	1	0	0	0	1	36	3	2	1	3	3	1	33.45	3	0
27345	1.43	0.25	0.69	10.59	40.4	0.66	0.11	0.49	0.02	1.2	1.1	3.1	1	0	0	0	1	28	1	2	2	2	3	3	31.44	1	0
27442	1.14	0.04	0.17	2.77	23.4	0.23	0.05	0.06	0.05	1	1.1	0.6	1	0	0	0	1	22	2	1	2	3	3	1	29.86	1	0
27506	1.53	0.1	0.69	6.62	41.8	0.53	0.19	0.23	0.07	0.1	0.5	0.5	1	0	0	0	1	22	2	2	1	3	1	3	29.51	3	0
27554	0.22	0.45	0.11	4.34	21.2	0.23	0.05	0.14	0.02	0.3	0.9	4.2	1	0	0	0	2	37	1	1	1	1	3	1	29.44	3	0
27606	2.38	0.1	0.32	3.77	44.4	0.23	0.05	0.25	0.07	0.1	0.9	6.1	1	0	0	0	1	21	1	1	2	3	3	1	24.02	3	0
27648	0.24	0.38	0.16	2.66	34.2	0.2	0.11	0.12	0.03	0.4	1.4	7.4	1	0	0	0	1	34	1	2	2	1	3	2	23.25	3	0
27676	9.67	0.09	0.29	8.23	72.8	0.88	0.22	0.37	0.36	0.2	1.9	2	1	0	0	1	1	35	2	1	3	1	3	2	28.12	3	0
27716	0.8	0.03	0.17	0.96	13.6	0.23	0.05	0.03	0.02	0.2	0.4	0.9	1	0	0	0	1	27	1	2	1	1	3	2	26.53	2	0
27855	0.22	0.08	0.06	1.06	10.7	0.23	0.05	0.05	0.02	0.3	1.2	4.1	1	0	0	0	2	28	1	1	1	2	3	1	23.34	3	1
27884	0.99	0.32	0.82	5.83	34.6	0.4	0.12	0.28	0.06	0.3	1	1.5	1	0	0	0	1	35	1	2	1	2	3	2	35.56	3	0
27914	2.28	0.12	0.54	3.34	80.6	0.44	0.05	0.13	0.15	0.4	0.9	1.4	1	0	0	0	1	34	1	2	1	1	3	1	28.1	3	0
27941	4.14	0.12	0.39	7.83	35.2	0.54	0.27	0.17	0.2	0.3	1.3	1.1	1	0	0	1	1	25	3	1	2	3	3	3	38.53	1	0
27988	9.73	0.22	0.34	3.85	59.1	0.81	0.08	0.25	0.03	1.1	1.3	0.4	1	0	1	0	3	20	3	2	3	3	3	1	35.83	1	0
28015	1.39	0.13	0.47	3.29	39.5	1	0.15	0.13	0.08	0.2	1.7	0.7	1	0	1	0	3	30	1	2	1	2	4	2	34.76	3	0
28057	1.12	0.88	0.22	5.11	27.9	0.6	0.19	0.09	0.09	0.7	1.8	0.1	0	0	0	0	2	39	1	2	1	2	3	3	24.08	1	0
28173	6.02	0.16	0.44	2.86	61.5	0.35	0.09	0.12	0.05	1.5	0.6	0.3	1	0	0	0	1	22	1	1	2	2	3	3	34.59	1	1
28222	2.15	0.8	0.53	8.76	67.3	0.93	0.09	0.53	0.09	0.8	0.7	0.3	1	0	0	0	3	39	2	1	1	1	3	3	31.41	1	0
28230	0.95	0.11	0.13	3.85	23.2	0.37	0.05	0.19	0.09	0.1	1.4	1.6	1	0	0	0	2	33	1	1	1	1	3	1	19.53	3	0
28245	33.43	0.12	0.55	2.64	43.5	2.21	0.19	0.12	0.1	1.7	1.7	1.1	1	0	0	0	1	21	2	2	2	3	3	1	28.53	1	0
28252	2.84	0.09	0.26	5.87	29.7	1.18	0.18	0.18	0.04	0.1	1.9	0.3	1	0	0	0	1	28	2	1	1	2	1	1	31.57	2	0
28267	2.09	0.14	0.48	5.68	45.6	0.6	0.47	0.11	0.1	0.1	0.7	0.7	1	0	0	0	3	26	1	1	2	2	3	3	19.08	3	0
28292	1.42	0.24	0.17	8.34	23	0.5	0.05	0.16	0.09	0.9	2	1.8	1	0	0	0	1	29	1	1	1	1	5	2	27.2	1	0
28298	0.39	0.15	0.09	1.63	3.2	0.59	0.05	0.04	0.02	0.2	3.2	0.6	1	0	0	1	1	27	1	2	1	1	3	1	37.18	3	0
28308	1.58	0.48	1	9.26	57.4	1.42	0.17	0.41	0.08	0.2	0.5	0.5	1	0	0	1	1	34	1	2	1	3	3	1	32.12	3	0
28310	2.78	0.09	0.23	3.22	102	0.53	0.08	0.13	0.1	0.1	0.9	0.8	1	0	0	0	1	30	1	1	1	1	3	2	31.04	3	0
28316	2.73	0.08	0.37	4.17	36.2	0.39	0.14	0.21	0.14	0.2	0.6	0.2	1	0	0	0	1	21	2	1	2	2	4	1	61.62	3	0
28421	1.02	0.79	0.79	11.63	50.2	0.56	0.12	0.67	0.03	0.3	0.2	1.3	1	0	1	1	1	38	2	2	1	2	2	3	31.97	3	0
28440	3.24	0.03	0.17	1.98	25.7	0.23	0.05	0.11	0.05	0.3	1.2	1.3	1	0	0	0	1	26	1	1	3	1	3	3	24.02	3	0
28446	3.66	0.04	0.38	3.1	44.4	3.54	0.16	0.13	0.1	1.9	6.1	2	1	0	0	0	1	22	1	1	2	1	5	1	29	1	0
28569	0.42	0.27	0.17	3.99	41.5	0.55	0.05	0.21	0.02	0.3	2.4	5	1	0	0	0	1	35	3	1	1	2	4	2	31.97	3	0
28597	2.58	0.15	0.52	6.83	100.8	0.91	0.07	0.19	0.12	0.2	1.1	1.9	1	0	0	0	1	21	1	1	2	1	3	1	27.74	1	0
28718	7.25	0.17	0.53	5.48	77	0.78	0.09	0.2	0.35	2.8	1	0.3	1	0	0	1	1	20	2	1	1	2	3	2	22.26	1	0
28755	2.04	0.43	0.51	11.15	87.4	0.88	0.16	0.35	0.21	0.2	1.1	1.9	1	0	0	0	1	38	2	2	1	1	3	2	35.62	3	0
28779	1.71	0.33	0.7	11.46	41.6	2.5	0.36	0.48	0.2	0.3	1.4	0.3	1	0	0	0	1	22	1	1	2	2	1	1	30.71	3	0
28813	1.2	0.42	0.6	10.39	360.1	3.05	0.49	0.29	0.34	0.5	2	0.4	1	0	0	0	1	29	1	2	2	1	4	2	31.11	2	0
28912	1.2	0.19	0.67	3.87	27.6	0.44	0.05	0.09	0.04	0.4	1.2	2.8	1	0	0	0	1	33	1	2	1	1	5	3	32.34	3	0
28923	1.99	0.25	0.94	5.38	70.3	0.6	0.2	0.44	0.12	0.3	0.8	1	1	0	0	0	1	23	1	2	2	3	4	3	43.94	3	1
28934	1.15	1.19	1.34	7.39	89.7	0.8	0.05	0.26	0.06	0.7	1	0.5	1	0	0	0	1	30	2	2	1	2	3	3	23.98	1	1
29129	0.42	0.08	0.26	1.64	172.2	0.23	0.05	0.11	0.12	0.2	0.4	1.3	1	0	0	0	3	31	1	2	1	2	3	3	44.29	3	0
29166	6	0.04	2.6	5.1	36.3	0.58	0.08	0.14	0.47	0.1	0.6	0.3	1	0	0	0	3	20	2	2	2	2	4	3	34.56	3	0
29197	1	0.09	0.11	2.74	19.9	0.23	0.05	0.06	0.06	0.1	0.6	1.2	1	0	0	0	2	29	1	2	1	2	3	2	37.25	3	0
29263	4.7	0.43	0.84	9.27	62.4	1.12	0.11	0.36	0.1	0.4	1.2	2.6	1	0	0	0	1	35	1	2	2	3	3	1	21.47	1	0
29302	0.22	0.03	0.06	0.67	7.1	0.23	0.05	0.011	0.02	0.1	1.8	0.2	1	0	0	0	1	34	2	1	1	2	1	2	33.41	2	0
29347	2.16	0.2	0.33	2.73	30.5	0.94	0.05	0.06	0.03	0.7	0.9	1.2	1	0	0	0	2	28	1	2	3	1	3	1	26.29	1	0
29368	1.39	0.15	0.31	5.86	49.7	0.47	0.05	0.49	0.04	0.3	1.1	5	1	0	0	0	1	34	2	1	2	2	3	1	28.23	3	0
29416	2.07	0.12	0.27	4.98	48.8	1.3	0.16	0.22	0.09	0.3	2.8	0.5	1	0	0	0	1	22	1	1	1	3	4	1	25.33	2	0
29426	1.75	0.35	0.7	7.92	82.2	0.62	0.19	0.25	0.16	0.3	0.9	1.6	1	0	0	0	3	33	2	1	1	2	3	3	23.99	3	0
29431	0.22	0.04	0.06	0.89	11.1	0.23	0.05	0.07	0.02	0.1	0.5	2.9	1	0	0	0	2	26	1	1	1	1	3	2	29.13	3	0
29436	2.4	0.21	0.37	5.85	14.2	0.71	0.05	0.19	0.07	0.3	0.8	0.4	1	0	0	0	3	35	3	2	1	2	1	3	35.3	3	0
29488	2.21	0.93	1.4	6.05	108	0.66	0.05	0.33	0.09	0.8	1.4	1.6	1	0	0	0	3	37	1	2	1	1	4	3	25.31	3	0
29491	0.52	0.05	0.06	1.54	14.1	0.23	0.05	0.05	0.02	0.1	0.7	1.9	1	0	0	0	1	35	1	2	1	1	3	1	26.51	3	0
29494	0.8	0.08	0.09	1.65	14	0.23	0.05	0.03	0.04	0.5	2.3	0.5	1	0	0	0	1	32	2	1	2	2	3	2	20.46	1	0
29529	0.9	0.18	0.16	2.89	23.2	0.23	0.05	0.09	0.04	2.4	1.2	0.5	1	0	0	0	1	34	2	2	1	1	3	3	31.93	1	0
29546	1.1	0.94	0.57	6.93	60.9	1.59	0.31	0.19	0.44	0.9	1.1	0.14	1	1	0	1	2	37	3	2	2	3	3	3	19.53	1	1
29547	1.65	0.13	0.06	2.1	39.3	0.23	0.05	0.17	0.02	0.2	0.8	3.9	1	0	0	0	1	28	1	1	2	2	3	1	22.79	2	0
29587	0.41	0.23	0.36	14.65	67.6	1.39	0.66	0.41	0.62	0.9	0.7	0.4	1	0	0	0	1	20	3	1	2	3	1	1	34.86	1	0
29598	2.44	0.11	0.27	3.57	13.8	0.69	0.13	0.12	0.11	0.4	1.3	0.2	1	0	0	0	1	24	1	1	2	1	3	2	19.24	1	0
29613	1.89	0.57	0.23	5.19	85.7	0.46	0.07	0.2	0.09	1.1	1.6	0.14	1	0	0	1	1	28	2	1	2	1	3	1	25.86	1	0
29616	0.22	0.24	0.2	4.06	13.6	0.75	0.1	0.48	0.06	0.7	2.5	0.6	1	0	0	0	1	36	3	2	2	3	4	2	25.06	1	0
29671	5.7	0.11	0.33	6.41	38.7	0.6	0.07	0.17	0.07	0.8	1	0.4	1	0	0	0	1	20	3	1	3	3	3	3	21.87	1	0
29772	11.04	0.3	0.68	5.95	184.8	0.23	0.08	0.27	0.11	0.4	0.9	0.3	1	0	0	0	1	24	2	1	2	1	3	1	30.3	1	0
29786	2.99	0.26	0.61	9.65	104.6	0.39	0.08	0.36	0.32	0.3	0.6	0.7	1	0	0	0	1	25	3	1	2	2	3	2	20.51	1	0
29788	1.34	0.32	0.34	12.37	47.3	0.63	0.07	0.3	0.11	0.4	1.5	0.4	1	0	0	0	1	33	2	1	1	1	3	3	24.34	1	0
29826	2.95	0.11	0.59	15.26	207	0.58	0.1	0.19	0.18	0.1	0.5	1.2	1	0	0	1	1	30	1	2	1	1	1	3	26.52	3	0
29839	11.74	0.52	0.75	14.12	88	1.63	0.15	0.68	0.07	0.5	0.6	0.8	1	1	0	0	3	27	3	2	1	3	3	3	46.42	1	0
29847	0.52	0.08	0.12	1.39	8.3	0.23	0.05	0.04	0.02	0.2	1	7.8	1	0	0	0	3	31	1	2	3	1	4	1	20.01	3	0
29848	0.8	0.43	0.98	10.03	63.4	1.5	0.07	0.33	0.11	0.6	2	0.7	1	0	0	0	1	28	2	2	2	3	1	3	25.49	1	0
29867	1.02	0.03	0.06	0.75	3.7	0.23	0.05	0.03	0.02	0.2	0.6	1.5	0	0	0	0	1	24	1	2	2	1	3	2	18.01	3	0
29900	1.55	0.64	0.56	8.21	56.9	0.61	0.07	0.23	0.09	0.3	1	0.5	1	0	0	0	1	24	1	2	2	2	3	2	19.7	3	0
29908	1.5	0.08	0.18	2.54	41.4	0.59	0.05	0.17	0.08	0.2	2	3.2	1	0	0	0	1	27	2	1	2	2	4	2	30.42	2	0
29928	5.17	1.03	1.17	5.07	67.2	2.15	0.14	0.27	0.13	0.6	2.5	0.5	1	0	0	0	1	37	3	1	1	2	3	3	19.31	1	1
29955	0.22	0.1	0.14	3.39	23.4	0.23	0.05	0.1	0.05	0.3	0.9	0.7	1	0	0	0	1	31	1	2	1	2	5	2	22.77	2	0
29974	3.38	0.17	1.06	11.16	66.8	1.22	0.09	0.32	0.8	0.2	0.5	0.7	1	0	0	0	1	24	2	2	3	1	1	1	29.76	3	1
30010	5.13	0.51	2.54	4.71	98.4	0.23	0.07	0.29	0.16	0.5	0.6	0.4	1	0	0	0	1	27	1	2	2	2	3	2	22.02	3	0
30022	3.7	0.27	0.54	8.66	109.8	1.01	0.13	0.28	0.05	0.1	0.9	2.7	1	0	0	0	1	31	1	1	1	1	3	1	26.53	1	0
30047	5.44	0.21	0.39	7.24	82.2	1.1	0.15	0.23	0.17	0.2	1.2	2.4	1	0	0	0	3	24	3	1	2	1	4	1	23.07	3	0
30098	1.58	0.22	0.47	4.72	80.1	0.85	0.12	0.23	0.04	0.1	2.2	0.8	1	0	0	0	2	20	3	1	2	2	1	1	21.09	1	0
30103	1.85	0.62	0.37	8.83	40	0.44	0.05	0.31	0.06	0.4	1.8	1.9	1	0	0	0	1	31	1	2	1	1	3	2	22.42	2	0
30152	12.84	0.39	0.62	8.52	88.7	0.84	0.21	0.21	0.05	0.1	0.6	0.1	1	0	0	0	2	21	3	2	2	3	3	2	34.89	3	0
30163	1.25	0.27	0.28	10.55	69.8	1.28	0.12	0.4	0.09	0.5	2.3	0.8	1	0	0	1	1	33	2	1	3	1	1	1	40.96	2	0
30301	4	0.65	0.49	9.26	105	0.99	0.08	0.34	0.05	0.1	0.6	1.9	1	0	0	0	1	30	1	2	1	1	3	3	32.19	3	0
30319	0.96	1.59	0.84	6.83	66.6	2.14	0.42	0.35	1.05	0.6	2.2	1.1	1	0	0	0	2	24	2	1	3	3	4	1	31.9	3	0
30360	1.9	0.21	0.24	3.93	85.9	0.34	0.05	0.07	0.06	0.7	0.7	1.5	1	0	0	0	1	33	1	2	1	1	3	1	22.89	2	0
30465	4.52	0.13	0.16	3.6	32.8	0.37	0.08	0.18	0.07	0.3	1.5	2.5	1	0	0	0	1	31	1	1	1	1	3	1	23.21	3	0
30503	1.66	0.31	0.35	5.85	47.6	0.58	0.21	0.17	0.29	0.9	0.6	0.3	1	0	0	0	3	27	2	2	3	3	3	3	16.69	1	0
30512	2.97	0.25	0.31	7.3	73.3	1.44	0.28	0.22	0.11	0.2	2.2	1	1	0	0	0	1	38	2	1	2	2	4	1	32.8	3	0
30521	4.15	0.21	0.48	6.14	86	1.3	0.3	0.17	0.13	0.1	1.3	0.6	1	0	0	0	1	26	1	1	2	1	4	3	25.46	3	0
30549	3.77	0.07	0.28	7.51	19.8	0.6	0.12	0.25	1.12	0.1	2.6	5.1	1	0	0	0	2	34	1	1	1	1	4	1	21.77	3	0
30585	1.62	0.7	0.75	11.54	91.7	1.58	0.2	0.46	0.14	0.2	1.3	1.6	1	0	0	0	3	35	3	2	1	2	2	2	35.84	3	0
30603	0.74	0.16	0.3	7.46	69.9	0.55	0.1	0.2	0.09	0.1	1.2	0.9	1	0	0	0	1	39	1	1	1	1	3	1	29.04	3	0
30617	1.5	0.35	0.4	3.84	43.7	0.45	0.14	0.17	0.06	0.1	0.5	0.9	1	0	0	0	3	25	1	2	1	1	4	2	34.56	3	0
30665	0.22	0.06	0.06	0.85	7	0.23	0.05	0.04	0.02	0.2	1.3	2.9	1	0	0	0	1	23	1	1	2	1	5	1	28.01	1	0
30677	1.72	0.14	0.67	3.36	47.9	0.5	0.1	0.16	0.1	0.1	0.4	0.9	1	0	0	0	1	25	1	2	1	1	3	2	27.01	2	0
30678	0.96	0.05	0.31	5.55	46.1	0.47	0.07	0.2	0.1	0.3	0.8	0.2	1	0	0	0	1	25	1	1	3	2	1	1	27.63	3	0
30695	2.97	0.32	0.42	6.53	87.7	0.66	0.05	0.2	0.14	0.1	0.8	0.2	1	0	0	0	3	28	2	2	1	2	1	3	25.39	3	0
30697	1.63	0.19	0.22	2.76	26.7	0.87	0.17	0.15	0.12	0.3	2	0.6	1	0	0	0	1	33	1	1	1	1	3	1	29.31	3	0
30728	0.94	0.25	0.19	2.3	23.4	0.23	0.05	0.07	0.02	0.8	0.8	1.9	1	0	0	0	1	30	1	2	2	2	3	2	21.91	1	0
30868	1.51	0.59	0.51	9.07	65	0.54	0.08	0.18	0.16	0.5	0.7	1.6	1	0	0	0	1	35	1	2	1	1	5	2	24.06	1	0
30880	1.56	0.1	0.43	0.89	9.4	0.23	0.05	0.04	0.02	0.6	0.7	0.3	1	0	0	0	3	38	1	2	1	2	3	1	27.57	3	0
30899	0.56	0.03	0.06	0.97	1.7	0.23	0.05	0.04	0.02	0.1	3.4	3.7	1	0	0	0	2	39	1	1	2	1	3	1	22.72	3	0
30917	1.75	0.03	0.55	2.97	51.1	0.51	0.05	0.18	0.04	0.2	1.2	1.8	1	0	0	0	1	20	3	1	2	2	4	1	17.84	3	0
31045	1.98	0.06	0.19	2.61	31	0.23	0.05	0.18	0.02	0.2	0.6	0.8	1	0	0	1	1	22	1	2	3	2	3	1	21.91	2	0
31062	0.43	0.06	0.14	2.41	17.4	0.23	0.05	0.07	0.02	0.3	0.7	1.7	1	0	0	0	1	39	1	2	1	1	1	1	21.65	3	0
31111	3.81	0.17	0.28	7.98	32.7	0.63	0.1	0.26	0.18	0.1	1	0.9	1	0	0	0	1	34	1	1	1	1	3	3	29.41	3	0
31151	2.75	0.294	0.554	6.4	67.5	1.38	0.088	0.107	0.188	0.56	3.23	0.54	1	1	1	1	3	59	2	2	1	1	4	3	29.51	2	0
31152	29.2	0.175	2.44	8.76	54.1	1.07	0.057	0.206	0.14	0.25	0.58	1.13	1	0	0	0	3	27	2	2	1	2	1	1	39.88	3	0
31153	6.43	0.495	1.54	11.1	137	0.46	0.041	0.267	0.083	0.29	0.48	2.4	1	0	0	1	2	44	2	2	2	2	5	1	39.1	2	0
31158	3.62	1.73	0.469	9.28	30.3	1.74	0.068	0.175	0.087	1.56	1.85	2.09	1	0	0	1	1	71	1	1	1	1	3	2	21.65	1	0
31186	1.05	0.563	0.368	9.52	60.9	0.44	0.698	0.273	0.218	0.63	0.68	1.4	1	0	1	0	1	46	3	2	2	2	1	3	33.6	1	0
31195	0.17	0.414	0.248	8.71	34.2	1.19	0.294	0.185	0.129	0.14	2.05	2.59	0	0	0	1	2	73	1	1	1	1	3	3	22.75	2	0
31208	14	0.324	0.659	5.19	101	0.88	0.043	0.322	0.143	0.29	1.14	6.78	1	0	0	1	1	47	1	2	3	1	3	1	18.34	3	0
31212	1.96	0.278	0.559	4.32	65.2	0.46	0.084	0.222	0.169	0.39	0.77	0.23	1	0	0	0	3	23	3	2	2	3	4	3	67.34	3	0
31223	0.81	0.977	0.298	9.21	122	1.66	0.507	0.193	0.204	0.41	3.26	0.45	1	0	0	1	2	61	3	1	1	2	1	3	30.22	3	0
31242	3	0.402	1.93	4.13	72.1	0.45	0.023	0.209	0.04	0.34	1.11	0.63	1	0	0	0	2	58	1	1	1	1	3	1	28.31	3	0
31255	2.69	0.285	2.76	7.26	148	2.14	0.252	0.46	0.569	0.28	1.07	1.01	1	0	0	0	3	34	3	2	1	2	1	3	30.4	3	0
31258	0.78	0.1	0.532	5.53	131	0.54	0.079	0.255	0.052	0.26	0.96	0.23	1	0	0	0	3	20	3	1	2	2	2	1	23.38	3	0
31259	3.02	0.03	0.604	7.54	44.2	0.82	0.047	0.101	0.089	0.25	1.5	2.72	1	0	0	0	3	35	1	2	2	2	4	2	28.81	3	0
31262	0.51	0.557	0.357	3.84	30.2	1.01	0.112	0.121	0.126	0.33	4.17	0.43	1	0	0	0	1	52	3	1	1	2	1	3	27.78	2	0
31278	0.36	0.446	0.166	3.07	36.5	0.35	0.047	0.064	0.015	1.21	3.08	0.23	1	0	0	1	3	65	3	1	1	1	1	3	26.01	1	0
31284	1.04	0.518	0.535	11.5	70.6	5.38	0.455	0.389	1.378	0.39	8.77	5.32	1	1	0	1	2	80	1	1	1	1	3	3	21.18	2	0
31285	0.82	0.073	0.243	2.91	21.9	0.37	0.045	0.104	0.035	0.22	2.39	1.15	1	0	0	1	1	57	1	2	2	1	3	2	33.24	3	0
31291	1.54	0.214	0.296	9.14	30.4	0.81	0.083	0.314	0.042	0.23	1.74	3.77	1	0	0	1	3	52	1	1	1	1	4	2	39.5	3	0
31297	4.67	1.32	0.59	11	86.3	2.13	0.18	0.168	0.268	0.66	3.15	1.46	1	1	0	1	2	85	2	2	2	1	3	3	26.87	2	0
31298	0.19	0.125	0.197	1.27	12.9	0.19	0.023	0.072	0.015	0.36	0.89	1.03	1	0	0	0	2	33	1	2	3	2	1	2	26.87	3	0
31302	0.88	0.05	0.186	3.29	37.1	0.2	0.042	0.145	0.021	0.14	0.52	0.84	1	0	0	0	1	24	1	2	1	2	3	2	30	2	0
31317	0.9	0.218	0.255	6.64	84.7	0.55	0.109	0.271	0.111	0.22	0.53	0.74	1	0	0	0	1	24	1	1	2	3	4	1	32.63	3	0
31324	3.32	0.416	0.327	5.03	52.3	0.59	0.068	0.152	0.044	0.14	1.24	0.99	1	0	0	1	3	47	1	2	1	1	4	1	29.94	3	0
31332	1.82	1.11	0.488	7.62	43.3	2.03	0.071	0.275	0.181	0.82	2.61	2.4	1	0	0	0	2	68	3	1	1	2	4	3	20.93	2	0
31334	1.76	0.592	0.442	15.6	190	0.87	0.177	0.396	0.027	0.26	1.54	1.73	1	0	0	1	3	55	1	2	2	3	4	2	43	3	0
31350	4.75	0.137	1.11	4.08	66.7	0.67	0.092	0.205	0.398	0.57	0.29	1.12	1	0	0	0	1	27	2	2	3	2	3	3	25.12	1	0
31380	0.08	0.902	0.111	5.83	33.4	1.29	0.071	0.102	0.135	0.83	3.08	1.33	1	0	0	1	1	69	3	1	1	2	4	3	20.51	1	0
31381	1.64	0.341	0.247	7.64	36.7	0.44	0.04	0.151	0.024	0.29	0.87	33.2	0	0	0	0	1	34	3	2	1	2	5	3	21.8	3	0
31383	1.29	0.306	0.891	7.39	66.4	0.52	0.127	0.147	0.557	0.26	0.53	0.69	0	0	0	1	1	27	2	2	1	1	3	2	28.15	1	0
31391	0.08	0.03	0.029	0.191	2.46	0.07	0.023	0.011	0.015	0.24	3.1	0.23	1	0	0	1	1	49	3	1	2	2	4	3	30.6	3	0
31403	4.6	0.103	0.442	6.54	29.7	0.53	0.096	0.227	0.095	0.14	0.77	0.23	1	0	0	0	1	21	1	2	3	2	4	1	29.15	3	0
31415	0.25	0.455	1.96	3.91	113	1.24	0.122	0.082	0.101	0.51	3.44	0.47	1	0	0	0	3	23	3	2	1	3	1	2	17	3	1
31429	0.94	0.338	0.295	6.72	112	0.58	0.166	0.371	0.174	0.2	1.13	0.23	1	0	0	0	1	40	3	1	1	2	4	1	27.01	3	0
31435	3.07	0.477	0.566	7	50.8	1.04	0.114	0.338	0.062	0.14	1.36	0.36	1	0	0	0	3	38	2	1	1	2	4	3	28.11	3	0
31437	0.78	0.934	0.247	3.13	17	0.34	0.036	0.055	0.015	1.48	2.65	0.88	1	1	0	0	1	59	1	2	1	2	5	3	26.24	1	0
31439	0.77	0.415	0.695	11.5	22.2	0.21	0.054	0.264	0.015	0.14	0.43	0.79	1	0	0	1	1	31	1	2	1	1	3	2	38.24	3	0
31457	0.23	0.293	0.104	2.92	19.1	0.24	0.035	0.192	0.022	0.33	1.23	1.12	1	0	0	0	3	61	2	2	2	1	1	3	22.44	3	0
31460	1.07	0.172	0.228	4.03	30.7	0.59	0.071	0.238	0.075	0.14	2.01	1.3	1	0	0	1	1	37	1	1	2	2	4	1	34.68	3	0
31470	1.08	0.362	0.711	5.8	46.1	0.7	0.089	0.265	0.064	0.28	0.84	0.8	1	0	0	0	3	26	2	2	1	3	1	1	32.49	3	0
31486	2.43	0.341	0.265	4.7	24.3	0.77	0.235	0.172	0.032	1.02	2.51	0.23	1	0	0	0	2	50	3	1	1	1	3	3	19.73	1	0
31491	1.79	0.092	0.465	3.01	9.65	0.22	0.045	0.12	0.043	0.34	1.18	1.42	1	0	0	0	1	46	1	2	2	1	4	3	38.73	3	0
31498	2.07	0.193	0.777	5.56	42.8	25.4	0.051	0.12	0.097	0.35	14.3	0.76	1	0	0	0	1	63	3	2	1	2	1	2	22.4	3	0
31509	1.36	0.345	0.558	5.53	20.6	0.91	0.034	0.133	0.033	0.83	3.41	0.96	1	0	0	1	1	35	1	1	2	3	3	1	24.39	1	0
31519	0.57	0.556	0.182	6	21.4	0.57	0.086	0.206	0.057	0.35	1.24	1.15	1	0	1	0	1	57	2	2	2	1	3	3	46.24	2	0
31520	0.89	0.105	0.413	5.09	14.1	2.9	0.085	0.176	0.136	0.14	9.22	2	1	0	1	1	3	53	3	1	2	2	4	2	25.73	3	0
31522	4.37	0.377	0.366	10.3	31.9	0.63	0.362	0.312	0.034	0.79	0.76	0.95	1	0	0	0	2	28	2	1	3	1	3	2	27.1	1	0
31527	3.42	1.97	0.61	8.54	36.7	2.45	0.123	0.27	0.067	1.24	5.34	1.5	1	0	0	0	1	59	1	1	2	2	3	2	21.34	1	0
31548	6.87	1.66	0.627	13.4	133	2.17	0.151	0.463	0.078	2.95	1.54	1.26	1	0	0	1	1	69	3	1	2	2	1	2	34.59	1	0
31569	0.86	0.702	0.437	5.38	49.2	1.56	0.111	0.102	0.166	0.29	1.87	0.7	1	0	1	1	1	62	2	2	1	1	3	1	28.08	2	0
31585	1.72	0.153	0.352	5.5	30.9	1.39	0.084	0.179	0.123	0.14	1.36	0.76	1	0	0	1	3	40	1	2	1	2	1	3	37.13	3	0
31592	0.82	0.488	0.331	8.01	39.6	1.45	0.039	0.343	0.078	0.65	4.32	1.26	1	0	0	1	2	62	3	2	1	3	1	3	26.98	3	0
31599	0.56	0.048	0.175	4.48	31.2	0.16	0.105	0.099	0.023	0.14	0.94	1.03	1	0	0	0	3	42	1	1	1	2	3	3	33.71	3	0
31615	1.05	0.132	0.334	1.37	7.69	0.07	0.023	0.051	0.015	0.55	0.8	0.61	1	1	1	1	1	47	1	2	2	2	1	1	36.26	2	0
31625	1.08	0.719	0.227	3.61	15.3	0.79	0.06	0.093	0.032	2.09	4.6	0.48	1	0	1	1	2	63	3	1	1	2	1	3	27.18	1	0
31640	21.1	0.658	0.262	6.03	34.3	1.22	0.089	0.214	0.723	0.75	1.34	0.23	1	0	0	0	1	44	3	2	3	3	1	3	27.58	1	0
31649	4.62	0.03	0.27	4.11	20	0.27	0.023	0.115	0.047	0.14	0.66	9.19	1	0	0	0	1	47	1	1	1	2	3	1	25.52	3	0
31657	7.19	0.7	0.311	9.08	57	10.8	0.118	0.167	0.136	0.64	12.4	1.92	1	0	0	0	3	73	3	1	1	2	4	3	22.69	2	0
31658	1.39	0.433	0.347	3.07	24	0.26	0.126	0.132	0.129	0.26	0.41	0.42	1	0	1	0	3	46	1	2	3	1	4	3	30.08	3	0
31661	0.76	0.043	0.118	2.63	6.71	0.28	0.023	0.059	0.015	0.2	2.02	4.17	1	1	0	1	1	48	1	1	3	2	4	2	24.82	3	0
31663	1.39	0.199	0.334	2.76	35.1	0.65	0.023	0.124	0.058	0.14	2.64	0.52	1	0	0	0	3	76	2	1	1	2	3	2	30.27	2	0
31668	2.57	1.85	0.639	10.1	101	0.98	0.103	0.346	0.102	0.7	1.33	0.78	1	0	0	0	3	85	1	2	2	2	3	1	21.13	3	0
31681	1.65	0.671	0.831	5.07	65.7	1.08	0.272	1.14	0.367	0.81	1.21	1.2	1	0	0	0	1	22	2	1	2	1	4	3	35.71	1	0
31690	4.08	0.834	0.547	8.19	74.8	1.33	0.061	0.306	0.141	0.75	1.47	1.47	1	0	0	0	2	38	1	2	1	1	3	3	25.16	3	0
31691	1.41	1.08	0.511	7.96	38.9	0.99	0.078	0.274	0.021	0.53	1.66	2.65	1	0	0	1	2	52	1	1	2	1	4	1	20.92	3	0
31706	1.13	0.307	0.576	7.85	35.4	0.65	0.176	0.347	0.112	0.27	0.93	1.64	1	0	0	0	1	45	1	2	1	1	3	1	24.63	3	0
31709	1.72	0.316	0.384	4.12	48.9	0.8	0.087	0.219	0.192	0.56	1.75	1.51	1	0	0	0	1	39	2	1	1	1	3	1	29.44	2	0
31748	2.03	0.155	0.397	5.92	33.6	0.74	0.189	0.105	0.136	0.14	1.47	1.31	1	0	0	1	1	50	1	1	1	3	3	2	23.04	3	1
31765	2.15	0.139	0.381	7.97	45	0.99	0.051	0.166	0.142	0.2	1.8	1.53	1	0	0	1	1	70	1	1	1	1	3	2	35.24	2	0
31767	0.59	0.752	1.93	6.78	228	0.83	0.05	0.325	0.283	0.8	1.1	1.97	1	0	0	1	1	45	2	2	1	1	3	3	39.44	1	0
31771	1.44	0.329	0.589	5.06	104	1.79	3.16	0.212	0.133	0.14	1.57	0.4	1	0	0	0	1	32	3	1	1	2	1	3	29.7	2	0
31785	0.53	1.78	0.158	2.93	15.9	0.37	0.023	0.075	0.015	1.15	1.3	0.37	0	0	0	1	2	83	1	2	2	1	3	3	20.1	2	0
31789	1.7	0.429	0.507	6.15	54.7	2.25	0.187	0.173	0.146	0.36	3.79	0.49	1	0	0	0	1	53	2	1	2	1	1	1	27.93	2	0
31795	0.49	0.215	0.333	8.76	70.4	0.73	0.07	0.258	0.104	0.24	1.78	0.84	1	0	0	1	3	60	3	2	1	2	1	2	24.7	3	0
31799	4.33	0.262	1.3	11.4	27.6	0.96	0.526	0.297	0.093	0.41	1.6	9.12	1	0	0	0	1	47	1	2	1	1	3	1	23.05	3	0
31800	0.96	0.557	0.167	3.9	37.6	0.55	0.023	0.102	0.034	0.4	1.81	2.03	1	0	0	0	1	60	2	2	2	1	3	2	23.35	3	0
31807	1.78	0.774	0.366	11	74.2	2.02	0.048	0.198	0.238	0.28	2.06	4.07	1	0	0	1	1	57	1	2	2	1	2	1	45.79	3	0
31813	14.3	0.903	0.65	7.72	139	1.79	0.086	0.216	0.173	0.67	1.07	0.75	1	0	0	0	1	47	1	2	2	3	1	2	29.76	1	0
31822	21.7	0.129	2.11	7.44	60	0.36	0.023	0.161	0.088	0.14	0.45	0.38	1	0	0	0	1	28	1	2	1	1	3	2	30.31	3	0
31824	0.91	0.03	0.18	1.87	25.9	0.23	0.023	0.076	0.037	0.22	0.18	0.85	1	0	0	0	1	22	1	2	1	3	3	2	22.6	2	0
31833	0.93	0.21	0.525	3.84	92.1	1.97	0.093	0.156	0.024	0.29	3.29	0.14	1	0	0	0	3	41	3	1	1	2	1	3	26.65	3	0
31837	3.28	0.118	1.29	18.1	48.4	0.83	0.097	0.355	0.162	0.14	0.41	0.98	1	0	0	0	3	24	3	2	1	3	1	3	29.98	3	0
31868	3.96	0.204	0.502	5.44	54.4	0.47	0.108	0.191	0.276	0.14	0.87	0.53	1	0	0	0	1	22	1	1	2	1	4	3	42.51	2	0
31874	0.86	0.114	0.291	3.91	34.5	0.23	0.036	0.131	0.066	0.2	0.55	1.44	1	0	0	0	1	29	3	2	1	1	1	1	23.57	3	0
31894	0.42	0.196	0.074	2.29	15.1	0.15	0.023	0.078	0.015	0.27	1.02	0.23	1	0	1	1	1	61	1	2	1	2	1	3	32.96	3	0
31914	0.67	0.166	0.219	2.94	12	0.6	0.059	0.118	0.09	0.26	2.84	1.09	1	0	0	0	1	51	2	1	1	2	3	2	22.06	2	0
31926	0.91	0.092	0.176	1.92	46.5	0.19	0.023	0.073	0.091	0.14	0.78	0.46	1	0	0	1	1	51	2	2	1	2	3	2	41.56	3	0
31929	2.1	0.414	1.07	7.87	330	0.87	0.13	0.248	0.525	0.14	0.5	0.23	1	0	0	0	3	20	1	2	2	2	4	2	23.17	3	0
31946	0.49	0.452	0.728	4.69	69.2	2.17	0.062	0.344	0.097	0.14	12.1	0.23	1	0	1	1	3	65	2	2	1	2	3	3	24.71	3	0
31947	2.18	0.447	0.445	4.1	111	0.94	0.08	0.098	0.065	0.74	2.42	0.95	0	0	0	1	1	61	3	2	2	2	4	3	35.55	3	0
31958	9.96	0.986	0.667	14.9	36.1	0.55	0.42	0.245	0.108	0.65	1.25	1.6	1	0	0	0	1	49	1	2	2	2	4	3	29.65	1	0
31961	2.05	0.045	0.679	5.76	24.2	1.59	0.169	0.213	0.236	0.73	3.32	0.23	1	0	0	1	1	29	2	1	3	3	4	1	20.85	3	1
31964	0.31	0.097	0.268	2.76	28.2	0.45	0.023	0.09	0.135	0.14	1.06	2.57	1	1	1	1	2	77	1	1	1	2	3	3	31.32	2	0
31967	5.23	0.612	0.366	13.9	25.7	0.77	0.068	0.165	0.095	0.28	2.09	0.23	1	0	0	0	3	63	3	2	2	2	4	3	33.98	2	0
31979	0.94	0.154	0.409	5.03	39.9	0.51	0.04	0.291	0.108	0.14	1.61	1.62	1	0	0	0	1	51	1	1	2	1	3	1	24.06	3	0
31989	2.76	0.383	0.541	5.86	88.2	1.09	0.124	0.176	0.331	0.3	2.16	0.68	1	0	0	0	1	37	3	1	1	2	1	1	27.79	1	0
31991	0.15	0.058	0.125	0.619	6.6	0.07	0.023	0.043	0.015	0.14	0.33	0.62	1	0	0	0	2	33	1	2	2	2	1	1	21.93	3	1
31993	3.14	0.845	0.711	6.26	79.2	2.41	0.182	0.126	0.141	1.5	2.45	1.16	1	0	0	1	2	61	1	2	2	2	4	2	22.06	1	0
31996	0.49	0.172	0.448	1.36	33.2	0.11	0.023	0.098	0.062	0.51	0.92	0.23	1	0	0	0	3	28	3	2	1	2	1	2	27.99	3	0
32014	0.48	0.06	0.119	1.3	10	0.2	0.044	0.033	0.025	0.22	1.82	0.4	1	0	0	1	1	59	1	2	2	1	3	1	27.43	3	1
32015	0.69	0.83	0.127	2.98	26	0.42	0.04	0.098	0.045	1.1	2.15	0.23	1	0	0	0	3	60	1	2	2	1	4	3	23.55	1	0
32044	3.48	0.077	0.711	3.78	14.8	0.3	0.036	0.085	0.015	0.4	0.73	1.46	1	0	0	1	1	53	1	2	2	1	4	3	27.23	2	0
32062	0.72	0.451	0.488	7.78	65.3	3.23	0.071	0.243	0.167	0.34	3.29	0.23	1	0	1	1	2	73	3	1	3	3	1	3	32.25	2	0
32068	0.46	0.062	0.105	1.32	27.7	0.26	0.023	0.056	0.062	0.14	1.54	0.86	0	0	0	1	1	81	3	2	2	2	3	3	34.25	3	0
32075	0.21	0.883	0.638	8.48	253	1.07	0.137	0.235	0.385	0.37	1.42	1.65	0	0	0	1	1	85	2	2	2	2	3	3	26.25	2	1
32082	0.85	0.793	0.351	3.37	39	1.2	0.113	0.124	0.015	1.03	3.36	1.59	1	0	0	1	3	60	2	1	1	1	4	2	22.27	2	0
32113	0.55	0.827	0.287	9.08	54.7	1.8	0.023	0.381	0.042	0.51	2.23	3.76	1	0	0	0	2	62	3	2	1	2	1	1	32.89	3	0
32127	1.63	0.03	0.123	0.692	9.21	0.11	0.023	0.011	0.015	1.15	1.88	1.2	1	0	0	1	3	49	1	2	1	1	3	1	21.7	1	0
32132	0.87	0.03	0.173	1.3	18.3	0.18	0.023	0.051	0.054	0.2	0.35	0.92	1	0	0	0	3	31	1	2	1	2	4	2	46.59	3	0
32133	0.37	0.087	0.121	3.04	35.9	0.17	0.023	0.159	0.015	0.14	0.77	1.41	1	0	0	0	1	30	1	2	1	1	1	2	29.3	3	0
32136	1.18	0.081	0.264	6.48	26.9	0.13	0.054	0.139	0.026	0.14	0.68	0.56	1	0	0	0	3	42	1	2	1	2	3	2	33.4	3	0
32161	2.94	0.237	0.492	9.62	51.6	0.48	0.069	0.211	0.015	0.25	0.97	2.3	1	0	0	0	1	38	2	2	2	2	5	2	19.63	3	0
32163	0.33	0.047	0.18	1.89	13.9	0.28	0.059	0.052	0.025	0.14	1.63	0.93	1	1	0	1	1	47	3	2	2	2	1	3	32.26	3	0
32164	0.6	0.087	0.308	3.6	32.2	0.21	0.343	0.201	0.054	0.14	0.65	0.35	1	0	0	0	1	22	2	1	3	1	3	1	22.08	3	0
32165	1.84	0.379	0.561	9.89	81.5	1.54	0.401	0.308	1.393	0.14	1.38	0.75	1	0	0	0	1	40	3	1	1	3	1	3	26.98	3	0
32197	0.26	0.138	0.459	2.5	25.6	0.45	0.023	0.095	0.045	0.32	1.67	1.38	1	0	0	0	1	43	3	2	1	2	1	3	36.37	3	0
32199	0.45	0.295	0.146	4.58	40.1	0.38	0.111	0.172	0.034	0.3	0.91	0.36	1	0	0	0	1	27	1	2	2	2	3	3	19.37	3	0
32201	11.1	1.11	0.271	4.44	69	1.22	0.104	0.143	0.606	0.42	1.56	1	1	0	1	0	1	53	1	2	2	1	3	3	40.36	2	0
32202	0.18	0.95	0.175	3.1	24.6	0.79	0.043	0.114	0.203	1.98	9.76	1.1	0	1	0	0	2	81	2	1	1	2	3	3	22.96	2	0
32204	1.15	0.447	0.28	4.09	16.8	0.4	0.07	0.093	0.015	0.32	1.33	1.15	1	0	0	0	1	40	1	2	2	1	1	3	31.13	3	0
32225	1.73	0.379	0.427	4.7	160	1.08	0.145	0.299	0.154	2.08	1.98	1.03	1	0	0	0	1	23	3	1	2	3	4	1	23.38	3	0
32250	0.87	0.17	0.272	4.21	66.3	0.23	0.04	0.129	0.267	0.25	0.29	1.38	1	0	0	0	1	29	1	2	1	1	3	2	25.62	3	0
32254	5.05	0.462	0.696	4.74	67.8	1.78	0.287	0.173	0.377	0.32	2.19	0.87	1	0	0	0	3	65	1	1	1	2	3	1	26.19	3	0
32256	4.24	0.36	1.52	5.98	121	1.49	0.094	0.269	0.738	0.3	1.26	1.08	1	0	0	0	1	42	3	2	1	3	1	3	26.26	3	0
32270	3.78	0.206	0.317	6.06	90.4	0.41	0.023	0.124	0.185	0.58	1.19	0.23	1	0	0	1	3	57	1	2	1	2	3	2	49.61	3	0
32271	3.52	0.534	0.71	11	97.4	3.77	0.095	0.287	0.042	0.29	2.85	0.42	1	0	0	1	2	83	1	1	1	1	3	1	27.53	2	0
32279	0.48	0.177	0.206	3.5	10.5	0.41	0.043	0.079	0.025	0.56	1.78	2.6	1	0	0	1	1	73	1	2	2	1	3	1	28.92	2	0
32287	3.38	0.437	0.508	8	120	1.28	0.16	0.307	0.188	0.76	1.5	2.02	1	0	1	1	1	35	2	1	1	2	4	3	44.9	1	0
32296	1.86	0.22	0.466	6.38	37.7	0.52	0.071	0.287	0.058	0.2	1.35	0.73	1	0	0	1	3	43	1	1	2	1	3	3	41.96	3	0
32298	1.25	0.079	0.091	1.74	118	0.11	0.023	0.045	0.034	0.2	0.89	1.31	1	0	0	1	3	62	2	2	2	2	5	2	23.17	3	0
32303	0.24	0.199	0.127	1.36	11.6	0.23	0.094	0.041	0.03	0.25	0.86	0.69	1	0	0	0	1	30	3	1	1	2	4	3	20.66	1	0
32312	0.45	0.152	0.149	2.31	8.01	0.34	0.023	0.067	0.022	0.61	1.97	1.84	1	0	0	1	2	83	3	1	1	2	3	3	19.68	2	0
32316	2.39	0.707	0.626	5.7	164	0.6	0.035	0.119	0.051	1.01	1.42	0.85	1	0	0	1	2	85	3	2	2	3	3	3	22.8	2	0
32345	1.17	0.224	0.539	4.89	73.4	0.29	0.136	0.234	0.45	0.14	0.31	0.23	1	0	0	0	1	24	1	2	2	2	3	1	25.1	3	0
32349	0.56	0.463	0.474	4.64	42.2	0.42	0.212	0.247	0.038	0.34	0.98	2.23	1	0	0	0	1	32	1	2	1	3	4	3	36.98	3	0
32350	3.2	0.602	1.16	2.92	82.5	1.43	0.045	0.262	0.646	0.41	2.93	5.44	1	1	0	1	1	76	3	1	2	2	4	3	27.46	2	0
32357	3.69	0.223	0.472	7.64	12.5	1.02	0.111	0.196	0.176	0.88	1.48	6.02	1	0	0	0	1	31	1	1	2	1	4	2	24.01	1	0
32382	0.92	0.055	0.095	0.713	7.51	0.07	0.023	0.03	0.015	0.27	0.98	0.9	1	0	0	0	1	38	1	2	1	1	3	2	23.33	3	0
32389	4.2	0.22	0.312	6.65	20.9	1.4	0.093	0.202	0.121	0.62	2.63	7.31	1	0	0	0	1	28	1	1	2	2	3	1	24.62	1	0
32401	2.73	2.28	1.07	11.5	134	1.81	0.183	0.319	0.308	0.63	1.19	0.23	1	0	0	1	1	40	2	2	1	2	1	2	25.38	3	0
32405	5.52	0.158	1.17	8.86	80.6	0.53	0.073	0.24	0.133	0.24	0.66	0.81	1	0	0	0	3	36	2	2	1	1	3	1	38.77	3	0
32409	2.61	0.16	0.669	8.51	91.7	0.85	0.041	0.292	0.168	0.24	0.86	1.3	1	0	0	0	1	24	3	2	3	2	1	3	27.58	3	0
32440	1.41	0.225	0.729	6.62	40.1	1.6	0.059	0.188	0.14	0.23	3.07	1.4	0	1	0	0	1	72	3	1	1	2	3	2	36.45	3	0
32441	1.71	0.261	0.409	4.98	25.2	0.32	0.047	0.223	0.065	0.24	0.73	0.85	1	0	0	0	1	38	1	2	1	2	3	1	36.85	2	0
32442	2.36	0.098	0.112	2.91	20.3	0.43	0.023	0.09	0.015	0.24	2.93	0.81	1	0	0	1	1	72	3	1	2	2	1	1	23.73	2	0
32443	1.42	0.144	0.285	2.26	28.8	0.45	0.023	0.103	0.038	0.35	2.03	0.6	1	0	1	1	3	69	1	2	2	1	3	3	42.08	3	0
32447	1.01	0.762	0.309	8.56	100	1.83	0.261	0.463	0.374	0.53	4.07	1.36	1	0	0	0	1	65	1	1	1	1	3	1	26.74	2	0
32459	0.85	0.248	0.18	5.53	37.1	0.88	0.041	0.34	0.049	0.93	3.33	0.42	0	0	0	1	2	62	1	2	2	3	3	3	19.56	1	0
32488	1	0.111	0.198	1.71	19.1	0.38	0.041	0.074	0.042	0.36	1.07	0.95	1	0	0	0	3	50	1	2	1	1	3	1	37.11	3	0
32503	0.35	0.26	0.607	7.86	35.5	0.79	0.086	0.333	0.038	0.28	0.85	0.35	1	0	0	0	1	29	3	2	2	2	2	3	23.6	3	0
32506	3.67	0.617	0.584	8.26	104	1.16	0.41	0.47	0.214	0.31	1.96	0.71	1	0	0	1	1	25	1	1	1	1	3	1	26.63	2	0
32523	3.16	0.062	0.25	2.72	29.3	0.96	0.043	0.127	0.108	0.14	3.31	0.7	1	0	0	0	1	35	2	1	1	1	3	2	29.63	3	0
32548	2.49	1.17	0.403	4.25	21.5	2.14	0.113	0.157	0.087	0.96	4.6	2.34	1	1	0	1	1	64	3	1	1	1	3	2	22.87	2	0
32556	2.92	0.166	0.229	2.82	21.3	0.39	0.083	0.176	0.091	0.2	1	0.72	1	0	0	1	1	41	1	2	2	1	3	1	26.97	2	0
32560	0.43	0.094	0.33	1.75	34.6	0.19	0.023	0.049	0.052	0.49	0.82	1.02	1	0	0	0	1	23	1	2	2	3	3	1	17.81	3	0
32566	2.33	0.131	0.29	7.46	296	0.33	0.074	0.409	0.185	0.28	1.77	3.62	1	0	0	1	1	43	2	1	1	1	4	3	30.92	3	0
32591	1	0.612	0.279	4.94	32.6	0.76	0.069	0.209	0.088	0.53	1.41	1.33	1	0	0	0	1	52	3	2	1	1	4	3	41.25	3	1
32596	0.96	0.109	0.262	2.39	25.6	0.3	0.023	0.147	0.015	0.29	0.76	0.84	1	0	0	0	3	29	3	2	1	1	4	2	34.52	3	0
32599	1.61	0.127	0.215	2.45	34	0.25	0.035	0.106	0.044	0.14	0.71	1.34	1	0	0	1	1	45	2	2	1	2	3	3	24.38	2	0
32609	2.46	0.124	0.4	8.8	48.7	2.16	0.048	0.195	0.055	0.14	2.76	0.94	1	0	0	0	1	45	3	1	2	3	1	2	39.6	3	0
32615	0.08	0.289	0.235	1.99	43.5	0.34	0.023	0.038	0.095	0.88	1.14	0.23	1	1	1	1	3	64	3	2	2	3	1	3	28.97	1	0
32616	1.83	0.142	0.668	5.21	49.5	0.73	0.159	0.178	0.132	0.88	0.65	0.23	1	0	0	0	1	24	3	2	2	3	3	3	23.47	3	0
32627	1.26	0.067	0.181	5.07	5.91	0.16	0.044	0.078	0.015	0.28	0.82	0.88	1	0	0	0	1	45	1	2	2	2	3	1	22.64	2	0
32629	0.68	0.03	0.161	1.71	14	0.18	0.023	0.035	0.021	0.4	1.22	0.68	1	0	0	1	3	71	2	2	1	1	3	2	22.01	3	0
32632	0.08	0.085	0.054	1.2	4.71	0.16	0.023	0.092	0.015	3.06	2.65	0.44	1	0	0	1	1	55	2	2	2	1	3	3	28.13	1	0
32636	1.23	0.191	0.579	9.92	49.4	0.43	0.023	0.062	0.386	0.86	1.65	4.5	1	0	0	0	3	41	1	2	1	1	5	3	22	3	0
32641	3.18	0.551	0.419	9.78	111	1.15	0.246	0.208	0.218	0.22	1.17	4.31	1	0	1	0	1	50	1	1	1	2	1	2	26.52	2	0
32653	1.12	0.362	0.518	11.5	124	4.38	0.228	0.241	0.162	0.14	4.88	0.93	1	1	0	0	1	20	3	1	1	3	1	1	28.73	1	0
32663	6.87	0.324	0.836	7.25	37.7	0.28	0.036	0.195	0.045	1.23	1.09	0.23	1	0	1	1	1	40	3	2	1	2	3	3	44.93	1	0
32668	2.57	0.733	0.286	8.73	82	1.34	0.531	0.265	0.067	1.2	1.41	2.24	1	0	0	0	1	34	3	2	3	1	3	1	24.03	1	0
32680	0.58	0.104	0.174	3.11	32.4	0.24	0.035	0.106	0.028	0.65	1.24	0.23	1	0	0	0	1	33	1	1	2	1	3	1	33.18	2	0
32681	0.56	0.36	0.317	5.83	27.8	0.93	0.036	0.244	0.038	0.57	3.09	0.79	1	0	0	1	1	67	1	2	2	3	3	3	25.38	3	0
32684	2.17	0.557	0.215	2.74	63.8	0.65	0.04	0.168	0.054	0.52	1.56	1.6	1	1	0	1	3	67	2	2	2	2	4	3	33.24	1	0
32690	1.12	0.213	0.141	1.53	34.9	0.18	0.038	0.052	0.056	0.38	0.93	0.68	1	0	0	1	1	56	1	2	2	1	3	1	26.82	3	0
32691	0.74	0.839	0.208	3.72	9.09	2.27	0.173	0.225	0.112	2.23	5.8	4.19	1	0	0	0	1	43	2	1	2	2	4	2	23.89	1	0
32708	3.68	0.495	0.733	6.27	47.3	0.8	0.052	0.276	0.068	0.4	1.73	1.95	1	0	0	1	3	53	2	2	1	1	4	1	35.93	3	0
32709	2.95	0.328	15	12.4	66.2	0.39	0.083	0.164	0.317	0.24	0.51	2.67	1	1	0	1	1	47	1	2	1	2	3	3	44.32	3	0
32714	0.7	0.124	0.349	1.63	24.8	0.11	0.023	0.057	0.015	0.24	0.77	0.23	1	0	0	0	1	26	1	2	3	2	3	1	19.34	2	0
32724	0.67	0.094	0.2	6.66	42.4	0.37	0.058	0.295	0.078	0.47	1.18	1.98	1	0	0	0	1	23	1	1	2	1	3	1	26.08	2	0
32733	1.66	0.061	0.157	1.26	10	0.25	0.023	0.025	0.032	0.47	1	0.23	1	0	0	0	1	40	1	2	1	1	3	1	24.88	2	0
32742	1.72	1.01	0.433	5.17	14.9	1.57	0.076	0.147	0.106	1.36	4.78	0.67	1	0	0	0	1	55	2	1	1	2	3	3	17.97	1	0
32756	5.99	0.196	0.517	8.68	27.6	1.84	0.088	0.18	0.113	0.24	3.43	0.93	1	0	0	0	2	69	2	1	1	1	3	3	40.18	2	0
32768	0.15	0.03	0.057	0.749	4.86	0.07	0.023	0.011	0.027	0.24	0.54	0.41	1	0	0	0	3	28	2	2	2	2	3	2	26.24	3	0
32775	1.7	0.446	0.272	3.22	33	1.21	0.034	0.441	0.262	0.56	3.18	1.9	1	0	0	0	2	69	3	1	2	2	4	3	38.68	2	0
32779	16.2	0.522	0.427	11.4	66.6	1.18	0.231	0.386	0.252	0.22	1.04	2.07	1	0	0	0	1	39	1	1	1	1	5	2	25.33	2	0
32781	0.24	0.085	0.242	6.3	124	0.36	0.22	0.141	0.122	0.14	0.58	0.23	1	0	0	0	3	26	1	2	2	2	4	3	21.06	3	0
32791	4.75	0.36	0.647	4.16	490	0.14	0.071	0.122	0.188	0.14	0.6	4.67	1	0	1	0	1	28	1	2	1	2	3	1	27.14	3	0
32794	19.8	0.215	2.06	8.38	24.8	0.61	0.086	0.294	0.083	1.45	0.99	0.23	1	0	0	0	1	26	3	2	3	3	3	3	20.69	1	1
32813	9.77	0.348	0.806	11.6	46.8	0.39	0.043	0.391	0.067	0.25	0.28	1.84	1	0	1	1	3	41	3	2	2	3	1	2	49.4	1	0
32825	1.27	0.096	0.275	3.25	47.6	0.35	0.049	0.169	0.111	0.39	2.69	6	1	0	0	0	1	37	1	1	2	1	4	1	34.22	2	1
32832	1.78	1.46	0.442	12.6	207	0.95	0.055	0.222	0.277	0.85	1.68	0.93	1	0	0	0	3	75	2	2	1	2	3	2	15.98	2	0
32837	2.21	0.185	0.332	5.4	55.3	0.66	0.178	0.355	0.219	0.14	0.94	2.09	1	0	0	0	2	33	1	1	1	2	4	2	34.28	3	0
32838	2.74	0.168	0.623	6.14	112	0.84	0.196	0.276	0.129	0.21	1.48	0.23	1	0	0	0	1	22	2	1	3	2	1	1	22.82	1	0
32868	85.7	1.62	2.15	11.5	47.6	0.89	0.11	0.562	0.159	1.2	1.64	0.99	1	0	0	1	1	41	2	2	2	3	5	3	42.65	1	0
32901	1.59	0.125	0.333	5.37	40.4	0.73	0.076	0.237	0.052	0.14	0.71	0.54	1	0	0	0	3	24	1	1	1	2	4	3	32.46	3	0
32908	2.43	1.48	0.508	8.76	46.1	3.33	0.111	0.202	0.333	1.9	3.2	0.64	1	0	0	1	3	62	2	2	2	3	4	3	30.29	1	0
32910	1.49	0.168	0.407	7.23	103	0.48	0.093	0.201	0.147	0.14	0.74	3.39	1	0	1	1	1	39	2	1	1	1	3	2	47.23	3	0
32921	2.88	0.175	0.775	8.11	24.8	19.1	0.102	0.275	0.044	1.07	12	0.63	1	0	0	0	1	23	3	1	2	3	1	3	21.95	1	0
32924	0.21	0.604	0.097	2.91	22	0.55	0.066	0.04	0.04	0.89	1.63	3.89	1	0	1	0	3	53	3	1	2	2	4	2	49.8	1	0
32925	1.94	0.524	0.479	7.78	163	1.7	0.056	0.149	0.081	0.75	2.17	0.71	1	0	0	0	1	43	3	1	1	3	1	3	26.52	1	0
32926	0.76	0.131	0.179	2.86	31.1	0.48	0.032	0.219	0.015	0.47	5.68	2.03	0	0	1	1	1	70	1	1	1	1	3	3	28.36	2	0
32938	0.32	0.089	0.112	1.7	9.76	0.28	0.023	0.124	0.015	0.43	1.75	0.23	1	0	0	1	3	79	2	2	1	2	3	3	26.52	2	0
32941	4.66	0.383	0.625	3.04	54.6	0.68	0.047	0.083	0.084	0.39	1.88	0.23	1	0	0	0	1	56	1	2	2	2	1	3	36.31	2	0
32960	5.4	0.258	0.939	4.55	51.4	0.9	0.065	0.079	0.111	0.47	1	1.63	1	0	0	1	3	42	3	2	1	2	4	2	45.27	3	0
32962	0.6	0.2	0.545	2.18	51	0.19	0.059	0.155	0.082	0.33	0.73	0.55	1	0	0	1	1	40	1	2	1	1	3	2	36.52	3	0
32963	8.88	0.219	0.402	6.75	35.1	5.42	0.102	0.255	0.029	0.2	13.4	0.5	1	0	0	0	1	32	3	1	1	2	1	2	29.19	2	0
32964	0.87	0.182	0.183	3.08	44.6	0.28	0.057	0.131	0.041	0.14	0.92	1.13	1	0	0	0	1	30	1	2	1	1	4	1	26.47	3	0
32972	0.25	0.056	0.145	1.03	22.4	0.3	0.023	0.032	0.038	0.38	2.33	0.23	1	1	1	1	1	67	2	2	1	2	1	3	23.26	3	0
32977	3.05	0.48	0.447	4.76	48.9	1.13	0.119	0.243	0.319	0.53	2.59	0.23	1	0	0	0	2	37	3	1	2	1	3	1	18.72	1	0
32988	0.29	0.06	0.113	3.93	8.1	0.21	0.023	0.039	0.015	0.29	1.87	13.9	1	0	0	0	1	39	1	1	1	1	3	3	34.06	1	0
32997	0.41	0.333	0.186	8.36	30.4	1.01	0.117	0.215	0.2	0.14	4.65	0.84	0	0	0	0	1	41	1	1	3	2	4	1	17.86	3	0
33014	1.08	0.048	0.1	3.4	18.7	0.79	0.023	0.056	0.034	0.14	0.44	0.23	1	0	0	0	1	35	1	2	1	1	3	2	24.12	3	0
33020	2.02	0.775	0.596	4.35	58.6	0.72	0.106	0.236	0.146	0.73	2.02	0.94	1	0	1	1	1	39	1	1	2	2	3	1	34.59	1	0
33022	1.78	0.193	0.445	4.68	29.1	0.26	0.056	0.179	0.067	0.28	0.54	0.67	1	0	0	0	1	30	1	2	3	1	5	2	32.98	2	0
33023	1.5	0.174	1.86	9.94	62.2	0.86	0.048	0.26	0.079	0.38	1.99	1.3	1	0	0	0	1	29	1	1	1	1	1	2	28.77	2	0
33026	2.7	0.193	0.524	8.65	181	0.8	0.098	0.217	0.092	0.24	1.21	0.78	1	0	0	0	1	36	1	1	3	1	3	1	24.79	3	0
33028	3.53	0.245	0.34	9.57	79.9	0.82	1.22	0.244	0.257	0.14	1.43	1.21	1	0	0	0	1	27	2	1	3	2	1	1	31.87	3	0
33046	1.37	0.03	0.216	1.99	57	0.07	0.293	0.074	0.045	0.2	0.39	0.8	1	0	0	0	1	30	1	2	1	2	3	2	29.94	3	0
33067	5.71	0.28	0.91	6.36	34.4	0.45	0.06	0.285	0.058	0.36	0.65	0.7	1	1	0	0	1	38	2	2	2	1	4	3	29.08	3	0
33071	0.15	0.03	0.058	0.672	8.68	0.07	0.023	0.032	0.015	0.14	0.61	0.75	1	0	1	1	3	69	3	2	1	3	3	2	30.71	3	0
33076	0.39	0.333	0.197	2.06	39.5	0.52	0.108	0.169	0.015	0.27	1.53	0.44	1	0	1	1	1	54	3	1	1	2	1	3	26.11	2	0
33077	1.59	0.524	0.357	3.72	33.4	0.79	0.125	0.224	0.129	0.3	1.47	1.07	1	1	1	0	2	72	1	1	1	2	3	1	29.97	2	0
33081	0.53	0.086	0.177	2.64	36.2	0.21	0.04	0.101	0.026	0.14	1.02	0.48	1	0	0	0	3	42	3	1	1	3	3	1	28.73	3	0
33092	0.52	0.2	0.429	14.7	80.6	0.38	0.071	0.597	0.141	0.28	0.56	2.25	1	0	0	1	1	32	1	2	3	2	3	1	38.7	3	0
33095	0.18	0.259	0.408	8.94	56.5	0.51	0.101	0.309	0.139	0.14	0.98	0.23	1	0	0	0	3	31	1	1	1	2	4	2	31.51	3	0
33140	3.72	0.174	0.243	6.43	42.5	0.37	0.046	0.155	0.042	0.28	1.12	2.53	1	0	0	1	1	42	3	1	3	3	5	2	32.45	2	0
33144	1.17	0.055	0.205	5.22	27.4	0.31	0.023	0.218	0.042	0.14	1.09	1.1	1	0	0	0	3	58	1	1	1	1	3	2	34.58	3	0
33168	0.56	0.089	0.085	0.7	7.96	0.29	0.023	0.047	0.015	1.12	4.99	1.03	1	0	0	0	1	52	2	1	2	3	3	3	25.54	1	0
33169	0.72	0.188	0.349	4.89	86	0.33	0.063	0.254	0.091	0.26	0.45	0.46	1	0	0	0	3	20	1	2	2	1	4	3	33.29	3	0
33170	3.04	0.479	0.545	7.77	121	2.57	0.167	0.324	0.351	0.43	1.59	0.58	1	0	0	0	1	42	2	2	1	2	1	3	26.33	2	0
33196	0.96	0.217	0.252	5.87	37.6	0.29	0.051	0.227	0.145	0.14	0.47	1.41	1	0	0	0	1	28	1	2	1	1	3	3	26.45	3	0
33207	1.02	0.371	0.437	6.24	16.1	0.71	0.043	0.139	0.069	3.02	2.65	1.99	0	0	0	1	1	62	3	2	2	2	3	2	21.22	1	0
33213	2.95	0.451	0.277	6.51	61.5	0.59	0.133	0.162	0.063	0.38	1.24	0.23	1	0	0	0	1	50	1	2	2	1	4	2	23.64	2	0
33221	1.34	0.081	0.351	2.54	47.3	0.67	1.47	0.041	0.108	0.14	2.3	0.47	1	0	1	0	1	40	3	1	1	3	1	3	30.9	3	0
33229	7.65	0.56	1.58	9.6	120	2.36	0.074	0.329	0.137	0.25	0.93	0.62	1	0	0	0	2	29	3	2	1	2	1	3	32.99	3	1
33230	0.66	0.925	0.306	11	82.3	0.79	0.086	0.161	0.101	2.55	1.8	0.79	1	0	0	0	2	41	2	1	1	1	4	1	34.62	1	0
33232	2.6	0.26	0.833	9.22	45	0.44	0.687	0.314	0.082	0.26	0.51	3.14	1	0	0	1	3	31	1	2	2	1	4	1	40.57	3	0
33236	0.4	0.438	0.386	10.5	72.8	1.08	0.151	0.528	0.083	0.34	1.49	2.1	1	1	1	1	1	68	1	2	1	1	3	1	30	2	0
33240	1.53	0.176	0.761	13.9	83.1	0.73	0.092	0.255	0.115	0.14	1.25	2.2	1	0	0	0	2	46	1	1	3	1	3	3	26.45	3	0
33244	1.9	0.311	0.327	5.86	57.4	0.38	0.075	0.214	0.021	0.14	0.48	3.89	1	0	0	0	1	28	2	2	1	1	3	3	22.04	3	0
33245	3	0.03	0.898	7.84	66.6	0.38	0.032	0.216	0.036	0.14	0.76	0.23	1	0	0	0	1	32	1	2	1	1	3	2	29.05	3	0
33260	1.07	0.466	0.093	2.06	41.9	0.46	0.084	0.082	0.065	0.46	1.38	0.23	1	0	0	1	3	67	3	1	2	2	3	3	28.54	2	0
33261	3.79	0.29	0.373	9.48	66.2	0.71	0.062	0.264	0.121	0.14	1.34	1.29	1	0	0	1	2	51	2	1	1	1	3	2	27.56	2	0
33262	0.3	0.101	0.684	1.54	32.2	0.69	0.242	0.057	0.137	0.36	1	0.66	1	0	0	0	3	29	3	2	1	3	1	2	25.58	3	0
33272	3.58	0.266	0.293	21.5	79	0.48	0.047	0.587	0.108	0.14	1.03	1.32	1	0	0	0	2	32	1	1	1	1	3	1	29.68	3	0
33280	1.6	0.475	0.308	8.56	94.1	0.44	0.17	0.445	0.322	0.14	0.71	0.23	1	0	0	0	3	35	1	2	1	1	3	3	29.98	3	0
33283	1.07	0.03	0.089	0.781	8.4	0.07	0.023	0.028	0.015	0.22	1.04	1.39	1	0	0	0	3	43	2	1	2	1	3	2	24.2	3	0
33309	0.5	0.379	0.522	2.23	21.8	0.33	0.033	0.087	0.028	0.6	0.89	0.79	1	0	0	0	1	28	1	2	1	2	4	3	18.17	3	0
33317	5.34	0.457	1.12	9.72	60.4	0.51	0.142	0.286	0.968	0.41	0.56	0.44	1	0	0	0	3	28	1	2	1	1	3	3	27.19	3	0
33320	0.3	0.178	0.06	1.84	66.7	0.6	0.023	0.045	0.056	0.31	3.14	0.89	0	0	1	1	2	85	3	2	2	2	4	2	23.64	3	0
33328	1.31	1.77	0.326	9.59	43.3	1.67	0.195	0.879	0.086	2.36	4.35	1.47	1	0	1	0	3	52	2	1	2	2	4	2	22.63	1	0
33338	1.04	0.347	0.98	2.98	24.7	1.05	0.065	0.078	0.087	0.61	4.15	1.01	1	0	0	1	3	85	1	2	1	2	3	2	27.95	3	0
33345	4.02	0.473	2.33	7.1	80.3	1.15	0.111	0.284	0.105	0.56	0.8	4.34	1	0	0	1	1	46	1	2	2	2	3	1	47.79	2	1
33347	2.13	0.285	0.576	7.48	102	1.4	0.093	0.294	0.105	0.14	2.2	3.17	1	0	0	0	1	45	3	1	1	2	1	3	24.06	3	0
33363	0.96	0.102	0.261	8.4	43	0.78	0.043	0.297	0.015	0.28	1.5	1.2	1	0	0	1	1	57	1	2	1	1	3	1	25.43	3	0
33379	1.11	0.098	0.567	6.39	66	1.46	0.083	0.151	0.059	0.14	1.33	0.23	1	0	0	0	3	24	3	2	3	2	1	3	25.72	3	0
33390	0.7	1.24	0.306	13.9	24.8	1.48	0.173	0.39	0.064	0.68	3.48	1.96	1	0	0	1	3	46	2	1	2	1	4	2	26.49	2	0
33410	2.85	0.03	0.466	2.48	25.7	0.25	0.023	0.108	0.05	0.2	0.73	0.71	1	0	0	0	1	43	1	2	1	3	3	1	24.9	2	0
33412	0.42	0.508	0.434	7.6	61.8	2.21	0.72	0.34	0.055	0.49	2.73	0.66	1	0	0	0	1	29	3	1	3	3	1	1	21.96	1	0
33426	3.45	0.753	0.408	11.6	60.6	1.93	0.133	0.158	0.162	0.54	2.01	1.28	1	0	0	1	3	43	1	1	1	2	3	2	29.25	1	0
33428	0.45	0.472	0.293	11	81.5	1.99	0.047	0.189	0.05	0.14	4.57	0.23	1	0	0	1	2	62	3	1	1	2	3	2	27.44	2	0
33437	1.99	0.581	0.482	4.99	59.1	1.27	0.106	0.187	0.064	1.03	2.27	2.08	1	0	0	0	1	41	1	1	1	3	5	3	28.98	1	0
33443	1.69	0.241	0.34	3.57	39	0.5	0.035	0.144	0.081	0.62	1.74	0.47	1	0	0	0	1	35	2	1	3	2	3	3	26.59	2	0
33452	1.05	0.509	0.341	33.5	44.8	1.53	0.245	0.258	0.18	0.46	3.59	2.64	1	0	0	0	1	59	1	1	1	1	3	2	29.57	2	0
33517	3.17	0.391	0.574	4.15	39.4	1.11	0.043	0.172	0.072	0.26	2.61	0.57	1	0	0	0	1	71	3	1	2	2	1	3	27	2	1
33541	0.46	0.03	0.134	0.915	7	0.07	0.023	0.032	0.015	0.14	0.48	1.12	1	0	0	0	1	28	1	2	1	1	3	1	22.74	3	0
33543	2.33	0.956	0.525	8.39	35.6	3.16	0.05	0.147	0.084	0.39	4.52	0.56	1	0	1	1	1	76	2	1	1	1	3	2	20.83	3	0
33552	0.43	0.864	0.173	2.89	24.1	0.57	0.053	0.272	0.081	1.62	2.08	2.05	1	0	0	0	2	67	3	2	2	3	5	1	21.8	3	0
33563	1.75	0.134	0.718	5.06	12.8	0.15	0.023	0.196	0.023	0.35	0.86	1.14	1	0	0	0	1	54	2	2	1	1	3	2	34.67	3	0
33577	0.99	0.169	0.095	7.32	28.3	0.22	0.023	0.119	0.021	0.42	1.21	1.19	0	0	0	0	2	55	1	2	2	3	3	2	27.58	2	0
33589	0.3	0.111	0.259	3.23	42.2	0.39	0.072	0.219	0.025	0.4	0.89	1.32	1	0	0	0	1	20	1	2	1	3	5	3	26.7	2	0
33591	5.76	0.807	0.668	8.87	59.8	1.92	0.055	0.235	0.077	0.14	0.6	5.55	1	0	0	0	3	65	1	2	2	2	1	2	27.57	3	0
33607	5.01	0.461	0.302	6.06	74.9	0.38	0.097	0.461	0.326	0.14	0.38	0.23	1	0	0	0	3	27	1	2	1	2	3	2	30.87	3	0
33608	2.2	0.124	0.436	4.18	65.2	1.16	0.377	0.134	0.114	0.14	1.79	0.54	1	0	0	0	1	39	1	1	2	1	3	2	21.24	3	0
33612	2.3	0.059	0.421	5.64	56.8	0.42	0.067	0.086	0.094	0.14	1.36	1.11	1	0	0	0	1	35	1	1	1	1	3	3	33.04	3	0
33617	9.79	0.585	9.21	5.92	56	1.38	0.19	0.269	0.181	0.61	3.66	1.38	1	0	0	0	1	48	2	1	1	1	3	3	25.12	2	0
33627	2.29	0.503	0.428	20	96.1	1.94	0.161	0.566	0.047	0.2	2.7	5.08	1	0	0	0	1	46	1	1	2	1	3	2	26.74	3	0
33629	5.54	0.23	0.763	6.93	15.7	0.65	0.073	0.171	0.138	1.03	0.93	1.31	1	0	0	0	1	34	2	2	1	1	3	1	32.95	1	0
33630	0.2	0.354	0.102	1.77	13.6	0.53	0.075	0.097	0.123	0.66	2.88	2.02	1	0	0	1	1	36	3	2	2	3	4	3	24.43	1	0
33642	36.6	0.864	0.374	9.79	31.4	0.62	0.081	0.152	0.039	0.54	1.52	0.92	1	0	0	1	1	77	1	2	1	1	3	3	18.69	1	0
33645	0.2	0.063	0.146	1.54	19.3	0.19	0.023	0.07	0.129	0.2	0.77	1.76	1	0	0	0	3	25	1	2	1	1	1	2	25.72	3	0
33657	1	0.067	0.41	2.5	27.1	0.3	0.06	0.151	0.044	0.21	0.65	1.22	1	0	0	0	3	23	2	2	2	3	4	2	32.38	3	0
33658	20	0.326	2.93	7.6	123	1.42	0.081	0.292	0.117	0.53	1.19	1.35	1	0	0	0	1	41	1	2	3	2	3	1	26.07	2	0
33662	0.7	0.3	0.125	9.05	30.4	0.83	0.067	0.528	0.095	0.5	2.7	0.23	1	0	0	0	1	45	1	2	2	2	3	2	24.28	1	0
33663	0.79	0.161	0.474	6.9	21.1	0.38	0.056	0.222	0.063	0.38	1.71	1.73	0	1	1	0	3	76	1	1	2	2	3	2	35.72	3	0
33675	1.23	0.279	0.461	8.54	136	0.46	0.056	0.318	0.658	0.14	0.79	0.88	1	1	1	1	1	56	1	2	2	2	3	3	38.29	3	0
33681	1.28	0.108	0.087	1.61	21.8	0.27	0.069	0.089	0.222	0.14	1.51	1.32	1	0	0	0	1	29	1	1	3	1	3	1	30.16	3	0
33682	0.83	0.1	0.505	6.15	14.6	0.71	0.054	0.198	0.045	0.14	1.06	1.29	1	0	0	0	1	38	1	2	2	1	3	1	22.94	3	0
33694	4.16	0.315	0.503	5.94	78.7	0.98	0.114	0.191	0.091	0.28	1.58	1.84	1	0	1	1	1	54	2	1	2	2	3	3	39.18	3	0
33726	3.3	0.216	0.505	7.9	70.1	2.24	0.081	0.168	0.015	0.3	2.19	0.26	1	0	1	0	1	66	3	1	1	3	1	3	39.61	3	0
33731	0.4	0.06	0.176	1.91	44.3	0.13	0.144	0.057	0.03	0.14	0.65	0.61	1	0	1	1	3	26	3	1	2	2	4	3	45.39	3	0
33739	1.85	0.045	0.205	1.84	22.4	0.31	0.023	0.09	0.068	0.22	1.15	2.76	1	0	0	1	1	25	1	1	2	1	3	1	24.81	1	0
33744	1.09	1.81	0.294	15.9	43.1	0.58	0.496	0.285	0.029	0.87	1.33	0.5	1	1	0	1	3	48	2	2	1	3	3	3	28.54	1	1
33754	2.34	0.083	0.32	5.62	92.6	0.56	0.04	0.137	0.099	0.25	2.12	0.64	1	0	0	0	1	48	1	1	1	1	1	2	23.82	3	0
33771	1.03	0.25	0.198	3.25	61.7	2.55	0.168	0.062	0.386	0.42	7.88	0.23	1	0	1	0	1	66	3	1	1	3	1	3	27.52	1	0
33778	2.59	0.211	0.432	7.7	108	1.09	0.102	0.175	0.418	0.14	1.45	0.45	1	0	0	0	1	40	3	1	1	2	3	3	24.75	3	0
33784	3	0.078	0.075	3.63	15.9	0.32	0.023	0.054	0.015	0.14	1.74	1.37	1	0	0	0	1	54	1	2	1	1	3	1	34.92	3	0
33792	0.23	0.094	0.251	1.35	11.5	0.26	0.023	0.021	0.015	0.14	3.12	0.37	1	1	0	1	3	73	3	2	2	3	1	3	24.5	3	1
33796	2.09	0.403	0.534	3.35	18.2	0.5	0.036	0.213	0.188	0.61	0.93	4.67	1	0	0	1	3	81	1	2	2	2	3	2	27.99	3	0
33838	0.4	0.442	0.116	3.68	4.86	0.33	0.023	0.084	0.015	3.98	2.93	1.7	1	0	0	0	1	57	2	2	1	2	3	2	20.99	1	0
33840	0.95	0.03	0.049	1.83	14	0.16	0.023	0.126	0.015	0.21	1.1	2.29	1	0	0	0	1	35	1	2	2	1	3	2	19.05	3	0
33841	1.04	0.03	0.419	5.34	114	0.85	0.181	0.178	0.175	0.14	0.72	0.81	1	0	0	0	1	21	3	2	2	2	4	1	76.07	3	0
33864	0.57	0.705	0.279	9.13	47.6	1.88	0.05	0.222	0.056	0.31	4.53	3.97	1	0	0	0	1	61	1	2	3	1	3	2	26.29	2	0
33867	2.45	0.253	0.34	2.98	135	0.42	0.064	0.173	0.088	0.55	1.96	1.44	1	0	0	0	1	29	1	1	2	1	3	1	26.49	1	0
33880	4.92	0.296	1.16	5.08	31.2	0.55	0.037	0.246	5.052	0.59	0.98	10.4	1	0	0	0	1	29	1	2	1	2	3	2	24.15	1	0
33885	0.45	0.123	0.137	5.23	23.8	0.17	0.023	0.162	0.139	0.22	0.6	4.99	1	0	0	0	1	40	1	2	1	1	3	1	24.16	3	0
33892	0.73	0.239	0.123	0.902	7.69	0.13	0.034	0.02	0.015	1.15	1.16	1.07	1	0	0	0	1	70	2	2	2	1	3	3	19.23	2	0
33895	1.59	0.93	0.423	17.4	56.3	1.23	0.052	0.428	0.066	0.22	1.52	1.63	1	0	0	1	1	64	1	2	1	1	4	3	30.22	3	1
33899	6.23	0.222	0.689	7.05	99.7	0.39	0.116	0.264	0.521	0.14	0.42	0.23	1	0	0	0	1	30	1	2	2	3	3	3	40.61	3	1
33907	0.21	0.243	0.189	2.82	25.7	0.19	0.038	0.165	0.015	0.28	0.69	1.02	1	0	0	0	3	26	1	2	1	3	1	3	21.2	3	0
33908	0.59	1.18	0.62	7.9	66.5	1.78	0.148	0.229	0.169	0.14	1.06	0.38	1	0	0	1	1	21	3	1	2	2	1	3	23.4	1	0
33910	1.58	0.491	0.406	14.8	66.4	0.73	0.062	0.456	0.057	0.26	1.78	3.23	1	0	0	0	3	42	1	1	1	2	4	1	29.19	3	0
33918	0.25	0.084	0.102	1.55	22.9	0.14	0.054	0.049	0.041	0.14	0.77	1.15	1	0	0	0	1	31	1	2	2	2	1	1	25.63	3	0
33924	0.34	0.305	1.03	5.37	71.5	1.33	0.078	0.437	0.089	0.31	1.27	1.61	1	0	0	0	3	24	3	2	2	3	2	3	22.8	3	0
33930	0.46	0.502	0.272	3.33	59.2	0.63	0.053	0.065	0.13	0.63	2.61	2.02	1	0	1	1	2	74	2	1	1	2	3	2	31.53	2	0
33934	0.36	0.131	0.114	2.04	22.4	0.56	0.023	0.169	0.029	0.14	2.12	0.92	1	0	0	0	2	57	1	1	1	1	3	3	39.72	3	0
33941	0.43	0.532	0.28	4.62	98.6	1.24	0.143	0.118	0.085	0.4	2.08	0.82	0	0	1	1	1	81	2	2	1	2	1	3	25.04	2	0
33945	1.69	0.99	0.653	15.8	59.5	0.89	0.05	0.585	0.039	0.46	1.47	0.68	1	1	0	1	2	65	3	1	2	1	3	2	30.67	1	0
33947	2.97	0.835	0.278	6.26	51.7	0.97	0.08	0.112	0.043	0.6	2.63	1.47	1	0	0	1	1	64	1	1	1	1	3	3	28.44	2	0
33952	0.32	0.049	0.083	1.12	18.6	0.16	0.023	0.025	0.031	0.14	1.71	0.68	1	0	0	1	2	21	3	1	2	2	1	3	26.57	3	0
33959	0.99	0.268	0.455	3.2	26.3	1	0.043	0.137	0.058	0.94	3.72	1.03	1	1	0	1	3	81	3	2	2	3	3	3	25.7	3	0
33972	14.6	2.38	1.45	17.4	92.3	2.54	0.044	0.305	0.13	0.73	1.82	0.88	1	0	1	0	2	65	1	1	1	1	4	2	21.26	1	0
33974	1.48	0.03	0.765	3.14	41.4	0.18	0.023	0.125	0.079	0.22	0.39	0.23	1	0	0	0	2	25	1	2	1	1	3	2	23.01	2	0
33981	0.65	0.069	0.321	4.38	18.4	0.38	0.073	0.139	0.023	0.14	0.94	1.12	1	0	0	0	3	20	1	2	2	3	4	2	35.8	3	0
33998	0.12	0.179	0.14	1.52	73.5	0.14	0.681	0.059	0.154	0.14	0.44	0.33	1	1	1	1	3	46	1	2	1	3	3	3	34.52	3	1
34004	0.79	0.326	0.375	13.9	49.6	1.73	0.185	0.443	0.297	0.14	1.3	0.83	1	0	0	0	1	46	2	1	1	2	3	2	42.31	3	0
34017	0.19	0.057	0.071	0.831	7.58	0.18	0.023	0.041	0.031	0.24	0.58	0.92	1	0	0	1	1	30	1	2	1	1	3	1	28.89	3	0
34023	1.09	0.205	0.368	6.06	79.8	0.58	0.07	0.463	0.069	0.14	0.52	1.28	1	0	0	0	1	24	2	1	1	2	1	3	33.54	1	0
34062	0.65	0.03	0.132	1.58	6.28	0.12	0.023	0.116	0.015	0.28	2.42	1.18	0	0	0	1	1	67	1	2	1	1	3	3	43.3	3	0
34069	0.98	0.783	0.345	4.11	243	0.65	0.023	0.224	0.065	0.68	1.72	2.63	1	0	0	1	1	62	1	2	1	1	3	3	29.31	2	0
34073	1.04	0.328	1.74	9.31	39.7	0.61	0.035	0.177	0.064	0.23	1.12	0.77	1	0	0	1	1	39	1	2	1	1	1	1	21.6	3	0
34080	5.35	0.258	0.267	7.42	35.4	0.97	0.057	0.297	0.062	0.26	2.31	0.39	1	0	0	1	3	44	1	1	1	2	3	2	24.96	3	0
34086	0.52	1.25	0.366	6.63	107	0.44	0.141	0.256	0.102	0.66	0.67	0.23	1	0	1	1	1	64	3	1	1	1	3	2	33.4	1	0
34092	2.93	0.03	0.28	3.61	11	1	0.052	0.1	0.062	0.31	3.75	1.11	1	0	0	1	1	55	1	1	1	2	3	2	28.08	2	0
34096	0.65	0.157	0.303	3.17	61.7	0.19	0.023	0.107	0.073	0.52	1.94	1.19	1	1	0	0	3	82	3	1	1	1	3	3	27.79	2	0
34101	4.9	0.111	0.732	7.45	87.1	0.58	0.117	0.222	0.487	0.21	0.33	0.4	1	0	0	1	1	26	1	2	1	1	3	3	27.22	3	0
34108	0.42	0.145	0.367	8.43	85.5	0.3	0.187	0.261	0.175	0.14	0.73	2.8	1	0	0	0	1	25	2	1	2	3	3	2	36.62	3	0
34109	2.14	0.34	0.269	4.73	32.6	0.3	0.053	0.204	0.158	0.36	0.95	0.84	1	0	0	0	3	47	1	1	1	1	3	1	24.61	3	0
34114	2.06	2.16	0.566	10.3	60.8	4.33	0.229	0.338	0.217	1.23	5.1	0.38	1	0	0	0	1	69	2	1	2	2	4	1	24.51	1	0
34118	0.61	0.491	0.681	5.42	91.2	0.63	0.084	0.255	0.271	0.29	1.49	0.58	1	0	0	1	2	39	1	1	1	1	4	1	32.28	3	0
34123	5.86	0.672	0.843	8.6	103	0.75	0.112	0.427	0.166	0.14	0.91	2.08	1	0	0	0	1	43	1	1	1	1	3	1	25.76	3	0
34129	0.68	0.147	0.711	5.42	34.4	0.34	0.051	0.12	0.11	0.14	0.62	0.52	1	0	0	0	2	33	3	2	1	3	1	2	26.67	3	0
34130	0.61	0.03	0.134	1.5	9.7	0.37	0.023	0.059	0.024	0.23	1.43	1.11	1	0	0	0	3	38	3	2	1	3	2	3	25.25	3	0
34133	0.88	0.6	0.525	8.5	41	1.34	0.058	0.278	0.048	0.34	1.84	7.06	1	0	0	0	3	61	2	1	3	2	4	1	27.96	2	0
34136	6.83	0.196	0.572	11	76	0.52	0.111	0.212	0.105	0.23	0.82	1.29	1	0	0	1	2	29	1	1	2	1	3	2	43.19	3	0
34141	6.22	0.187	0.356	6.53	61.3	0.35	0.054	0.262	0.08	0.4	0.64	1.85	1	0	0	0	1	26	1	1	1	1	3	1	23.02	1	0
34150	6.98	1.01	0.326	3.73	49.1	2.45	0.084	0.206	0.133	0.41	1.61	2	1	0	0	0	1	64	2	1	1	1	2	2	31.33	1	0
34165	0.97	1.03	0.443	8.11	47.6	0.74	0.07	0.352	0.047	0.77	1.95	0.23	1	0	0	1	1	52	2	2	3	1	3	2	34.95	1	0
34173	1.91	1.6	0.816	5.53	176	0.89	0.046	0.119	0.222	1.4	1.94	0.23	1	0	0	0	1	78	2	1	1	2	3	3	20.58	2	0
34176	3.36	0.531	0.839	3.52	73	0.84	0.068	0.112	0.07	0.52	1.5	1.49	1	0	0	0	2	45	3	2	1	2	1	3	23.01	2	0
34180	2.47	0.131	0.565	2.78	25.7	0.32	0.168	0.121	0.054	0.14	0.65	1.33	1	0	1	1	3	46	3	2	2	2	4	3	35.21	2	0
34183	0.25	0.154	23.3	1.9	63.1	0.19	0.041	0.057	0.052	0.14	0.51	1.96	1	0	0	1	3	44	2	2	1	2	4	2	27.23	3	0
34223	1.03	1.09	0.395	4.12	60.6	0.82	0.05	0.133	0.043	0.62	1.96	0.51	1	0	0	0	1	60	3	1	1	3	1	3	21.81	1	0
34231	3.5	0.175	0.524	6.33	56.4	0.5	0.037	0.105	0.03	0.26	0.94	0.76	1	0	0	0	2	44	1	1	1	2	4	1	22.62	3	0
34245	6.14	0.12	0.376	9.65	55	0.9	0.048	0.376	0.089	0.29	3.02	1.37	1	0	0	0	1	51	2	1	3	2	3	2	27.9	3	0
34250	1.21	0.321	0.154	3.8	25.8	0.56	0.062	0.284	0.083	0.61	1.89	0.45	1	0	0	0	1	48	1	1	1	1	3	1	24.26	1	0
34274	1.93	0.274	0.403	15.4	53.4	1.42	0.102	0.242	0.04	0.27	2.17	0.23	1	0	0	0	3	38	1	1	1	2	3	2	36.43	3	0
34283	1.66	0.91	0.681	8.89	99.7	1.7	0.217	0.302	0.192	0.93	1.95	0.91	1	0	0	1	1	44	2	2	1	1	3	2	23.51	1	0
34288	0.08	0.206	0.047	1.57	28	0.16	0.023	0.04	0.015	0.38	1.09	3.44	1	0	0	0	3	83	3	1	1	2	3	3	30.66	2	0
34291	0.56	0.094	0.105	2.24	33.3	0.56	0.079	0.067	0.198	1.61	1.3	1.48	1	0	0	0	1	26	3	1	3	3	3	3	24.09	1	0
34292	6.19	0.338	0.657	6.29	60.1	0.79	0.066	0.445	0.222	0.14	1.46	0.92	1	0	0	0	1	49	1	2	1	3	3	2	22.58	3	1
34295	0.49	0.199	0.245	5.41	74.6	0.37	0.082	0.308	0.126	0.3	0.95	0.73	1	0	0	0	3	28	1	1	1	1	4	1	30.83	3	0
34300	0.43	1.96	5.21	5.9	64.1	2.16	0.071	0.074	0.092	1.71	5.64	1.03	0	1	0	0	2	81	2	1	1	2	3	2	25.49	1	0
34303	1.98	0.566	0.303	4.76	25	1.68	0.126	0.078	0.134	1.1	4.22	1.24	1	0	0	0	1	49	3	1	1	3	3	3	23.66	1	1
34310	5.29	0.999	0.472	7.36	41.2	0.67	0.088	0.309	0.077	1.66	0.76	0.23	1	0	1	0	3	40	3	2	3	3	3	3	43.07	1	1
34311	0.77	0.52	0.225	5.03	78.4	1.02	0.055	0.221	0.46	0.92	2.49	1.36	1	1	0	1	1	48	3	1	3	1	4	2	40.68	1	0
34327	0.56	0.459	0.545	5.48	105	1.96	0.13	0.13	0.287	0.27	1.99	0.44	1	0	0	1	3	82	3	2	2	3	1	3	31.86	3	0
34335	1.23	0.072	0.387	9.34	77.4	0.74	0.423	0.218	0.107	0.14	0.73	0.52	1	0	0	0	2	26	2	1	2	2	3	1	21.94	3	0
34336	1.86	0.11	0.377	5.44	51.6	0.36	0.04	0.306	0.044	0.14	1.06	0.5	1	0	0	0	1	35	1	1	1	1	4	1	27.17	3	0
34343	5.74	0.252	0.463	6.34	39.3	0.55	0.084	0.451	0.064	0.27	0.75	2.65	1	0	0	0	1	33	1	2	1	2	3	1	39.88	2	0
34354	16.1	0.395	2.18	10.9	50.1	0.47	0.064	0.244	0.318	0.36	0.84	0.37	1	0	0	1	1	34	1	1	2	2	4	1	25.77	3	0
34361	0.25	0.811	0.4	12.1	85.9	5.27	0.22	0.322	0.051	0.46	2.46	0.39	1	0	1	0	1	85	3	2	2	2	3	2	31.56	2	0
34374	2.2	0.626	0.879	3.22	61	0.44	0.265	0.154	0.219	1.06	0.67	0.66	1	0	0	0	2	34	3	2	1	3	2	3	29.92	3	0
34375	6.86	0.658	0.898	6.7	47.1	1.11	0.17	0.139	0.076	0.66	1.07	6.14	1	1	1	1	3	75	2	2	2	2	1	3	35.61	3	0
34383	0.08	0.03	0.179	0.637	5.18	0.07	0.023	0.033	0.015	0.22	0.3	0.69	1	0	0	0	1	34	1	2	1	1	3	2	26.48	3	0
34393	1.37	0.807	0.468	3.97	25.9	2.83	0.055	0.252	0.061	1.35	5.95	0.23	1	0	0	0	1	69	2	1	2	1	3	2	23.03	1	0
34402	1.37	0.063	0.83	3.08	17.9	0.97	0.052	0.109	0.027	0.14	0.95	0.36	1	0	0	0	3	28	2	2	3	2	1	3	35.55	3	0
34410	1.21	0.378	0.417	2.28	14.5	0.39	0.07	0.111	0.06	0.14	0.18	1.21	1	0	0	0	1	29	1	2	2	2	4	3	19.58	3	0
34411	4.16	0.94	0.361	9.67	148	0.89	0.023	0.264	0.081	0.77	1.16	1.29	1	0	0	0	1	49	1	2	2	1	1	2	37.05	2	0
34418	0.76	1.08	0.462	5.32	230	0.63	0.135	0.187	0.323	1.36	1.71	1.98	1	1	0	1	2	63	2	1	1	1	3	2	22.91	2	0
34424	3.64	0.319	0.314	6.42	43.1	0.37	0.335	0.394	0.106	0.26	0.18	0.39	1	0	0	0	3	27	2	2	1	2	3	2	24.8	2	0
34427	2.3	0.753	0.347	4.49	41.1	1.24	0.122	0.111	0.081	0.58	2.51	0.23	1	0	0	1	3	74	3	2	2	2	1	2	26.86	2	0
34437	5.85	0.156	0.41	6.38	24.8	0.53	0.057	0.212	0.067	0.22	1.26	1.48	1	0	0	0	1	37	1	2	2	1	3	1	26.72	2	0
34438	1.14	0.148	0.363	7.56	72.3	0.62	1.02	0.251	0.067	0.14	1.02	0.89	1	0	0	0	1	25	2	1	1	3	3	2	17.64	2	0
34443	6.12	0.085	0.282	8.25	34.3	0.67	0.092	0.14	0.234	0.14	2.15	7.86	1	0	0	0	2	20	2	1	3	2	3	1	24.13	3	0
34444	9.54	0.18	0.688	24.5	89.8	2.12	0.203	0.468	0.607	0.14	1.31	0.69	1	0	0	0	3	29	1	1	1	3	2	1	23.07	3	0
34450	0.54	0.391	0.138	4.94	11.3	0.69	0.023	0.108	0.022	1.53	3.91	0.71	1	0	0	0	1	49	2	1	2	2	3	3	22.22	1	1
34457	13.7	1.05	1.45	9.64	299	3.67	0.318	0.384	1.967	0.66	1.42	0.91	1	0	0	0	1	44	1	2	3	1	3	3	22.97	2	0
34465	1.93	0.281	0.429	3.89	45.4	1.41	0.208	0.164	0.095	0.21	1.9	6.96	1	0	0	0	1	47	1	2	1	2	4	1	32.03	3	0
34467	1.9	0.704	0.797	9.48	24.6	0.38	0.052	0.344	0.07	0.3	0.92	3.4	1	0	0	0	1	42	1	2	1	1	3	1	28.47	3	0
34469	0.61	0.109	0.357	2.33	18.6	0.24	0.023	0.089	0.015	0.14	0.59	0.59	1	0	0	0	1	22	1	2	1	2	3	2	26.41	2	0
34470	1.46	0.126	0.633	4.05	42.2	0.4	0.023	0.161	0.024	0.54	1.42	2.56	1	0	0	0	2	60	1	1	1	1	3	1	26.63	3	0
34472	4.08	0.928	0.633	7.76	116	1.43	0.121	0.219	0.084	0.34	2.21	0.23	1	0	0	0	3	45	2	1	1	1	3	3	33.9	2	0
34504	0.22	0.03	0.067	0.611	5.41	0.12	0.023	0.03	0.025	0.5	1.22	0.76	1	0	0	1	3	58	2	2	1	1	5	2	40.26	3	0
34507	0.51	0.143	0.148	1.92	17.9	0.22	0.023	0.049	0.035	1.59	1.41	0.87	1	0	0	1	1	61	3	1	1	2	1	2	33.7	1	0
34509	1.38	0.354	0.74	3.12	56.9	0.27	0.069	0.086	0.015	0.44	0.73	0.81	1	0	0	0	1	39	1	2	1	1	1	2	27.17	3	0
34514	4.53	1.3	1.14	4.87	24.2	0.81	0.061	0.181	0.054	2.07	2.63	1.05	1	1	0	1	1	63	1	1	2	2	3	1	28.19	1	0
34534	2.31	0.3	1.07	5.72	69.8	0.35	0.033	0.228	0.075	0.14	0.91	0.8	1	0	0	0	3	52	1	1	1	2	3	1	29.52	3	0
34538	0.95	0.377	0.282	5.13	63.8	1.07	0.023	0.21	0.104	0.53	2.67	5.11	1	0	0	0	2	76	2	1	1	1	3	3	23.91	3	0
34540	0.49	0.181	0.14	2.48	8.21	0.3	0.023	0.037	0.038	1.8	1.34	0.55	1	0	0	0	3	46	1	2	1	1	1	3	23.72	1	1
34546	0.49	0.089	0.15	5.02	20.8	0.16	0.023	0.087	0.025	0.14	0.64	0.23	1	0	0	0	1	23	1	2	2	1	4	1	35.06	3	0
34563	1.21	0.25	0.655	4.46	103	0.42	0.135	0.151	0.149	0.35	0.52	0.48	1	0	0	0	1	26	1	2	3	3	4	3	25.97	3	0
34571	4.02	0.07	0.48	4.31	86.7	0.39	0.042	0.165	0.204	0.14	0.44	0.4	1	0	0	0	1	29	1	2	1	1	3	2	17.41	3	0
34586	5.83	1.01	0.691	8.49	26.5	1.11	0.04	0.264	0.071	1.58	2.54	0.98	1	0	0	0	2	65	2	1	2	2	3	3	22.77	1	0
34591	2.21	0.471	1.46	9.62	108	1.22	0.161	0.271	0.249	0.32	1.02	0.92	1	0	0	0	3	31	1	2	2	1	4	2	25.74	3	0
34607	0.49	0.092	0.084	0.499	60.5	0.22	0.023	0.024	0.374	0.33	1.15	1.14	1	0	1	1	3	63	2	2	2	2	1	3	25.49	3	0
34614	3	0.098	0.797	4.31	48.6	1.08	0.04	0.206	0.099	0.14	1.84	0.23	1	0	0	0	1	23	1	2	2	2	3	3	29.01	3	0
34623	4.15	0.333	0.707	8.84	56.3	0.58	0.103	0.168	0.104	0.14	0.5	0.68	1	1	0	1	1	32	1	2	1	1	4	1	24.61	3	0
34637	2.43	0.319	0.336	7.95	72.6	2.14	0.245	0.234	0.526	0.14	3.99	4.33	1	0	0	1	2	48	3	1	1	3	3	2	36.54	3	0
34640	4.42	0.25	0.397	5.19	57.8	0.33	0.055	0.164	0.096	1.12	0.62	0.86	1	0	0	0	1	24	2	1	2	3	3	1	22.76	1	0
34644	2.44	0.46	1.98	7	87.2	1.48	0.106	0.283	0.038	0.52	1.32	4.11	1	0	1	0	1	38	3	2	1	3	1	2	33.68	3	0
34647	0.66	0.389	0.129	2.27	12.3	0.32	0.023	0.076	0.015	1.01	3.61	2.47	1	0	0	0	2	70	3	2	1	1	3	3	18.21	1	0
34653	2.89	0.251	0.472	3.62	65.6	0.58	0.023	0.076	0.13	0.37	1.26	0.91	1	0	0	0	3	34	3	2	1	2	1	3	25.96	3	0
34662	1.97	0.283	1.46	6.04	38.1	1.18	0.094	0.156	0.186	1.29	1.25	0.77	1	1	0	0	1	44	3	2	1	2	1	3	31.07	1	1
34669	3	0.228	0.169	3.55	4.64	0.62	0.023	0.101	0.029	1.02	3	0.98	1	0	0	0	1	40	2	1	2	1	3	2	23.77	1	0
34671	0.8	0.23	0.237	2.42	28.5	0.35	0.074	0.098	0.053	0.3	0.85	2.41	1	0	0	0	3	20	1	2	2	1	4	2	19.09	3	0
34681	1.39	0.398	0.252	8.71	74.6	0.43	0.112	0.278	0.302	0.14	0.52	2.59	1	0	0	0	1	39	1	2	1	1	3	2	30.38	3	0
34711	1.44	0.182	0.189	1.76	98.6	0.58	0.04	0.039	0.23	0.58	2.39	0.23	1	0	0	0	3	76	3	2	2	2	1	3	29.69	3	0
34713	3.65	0.476	0.634	5.55	63.8	0.53	0.042	0.092	0.062	0.29	0.85	0.51	1	0	0	1	3	72	1	1	1	1	3	3	25.58	3	0
34717	15.4	0.066	0.802	4.21	91.8	1.58	0.072	0.27	0.126	0.24	3.1	4.71	1	0	0	0	2	42	1	1	1	1	3	1	31.16	2	0
34719	0.42	0.082	0.12	1.21	1.61	0.14	0.037	0.038	0.033	0.42	0.57	0.57	1	0	0	0	1	24	3	2	3	1	3	1	39.74	1	0
34724	0.67	0.116	0.103	1.04	8.14	0.12	0.023	0.034	0.032	0.14	1.28	3	1	0	0	0	1	39	1	2	1	1	3	1	33.71	2	0
34726	1.46	2.35	0.463	7.82	49.7	1.62	0.107	0.266	0.138	1.79	4.61	1.37	1	0	0	1	2	67	2	2	2	2	4	3	28.31	1	0
34731	2.6	0.444	0.753	5.81	36.7	1.71	0.084	0.236	0.056	0.35	1.04	0.7	1	0	0	0	1	49	1	2	1	1	3	1	30.76	3	0
34737	1.8	0.115	0.598	9.63	221	0.4	0.042	0.243	0.218	0.14	0.3	0.61	1	0	0	0	1	21	1	2	2	1	4	3	22.26	2	0
34740	1.27	0.467	0.382	5.04	27.9	0.83	0.062	0.19	0.477	0.25	1.19	3.09	1	0	0	0	1	42	2	2	1	1	1	1	38.75	3	0
34776	0.48	0.208	0.086	1.21	6.53	0.35	0.023	0.049	0.015	0.9	3.69	1.43	1	0	0	0	1	50	3	1	2	2	3	1	33.47	1	0
34777	2.14	0.454	0.449	6.16	18.6	0.46	0.078	0.168	0.051	0.43	0.96	0.23	1	0	0	1	3	74	3	2	1	3	1	3	26.43	2	0
34782	0.37	0.291	0.276	2.72	22.2	0.95	0.107	0.141	0.035	0.31	1.92	0.76	1	0	1	1	3	85	3	2	2	2	3	2	30.52	3	0
34786	0.41	0.03	0.131	2.18	11.6	0.15	0.046	0.097	0.032	0.14	0.89	1.51	1	0	0	0	1	39	1	1	2	1	3	1	22.68	3	0
34807	0.72	0.173	0.108	2.64	6.94	0.29	0.023	0.039	0.015	0.46	1.57	0.37	1	0	0	0	1	59	1	2	1	1	3	1	32.94	2	0
34822	4.29	1.79	0.687	3.28	48.1	0.75	0.089	0.158	0.133	2.75	1.64	0.97	1	0	0	1	1	46	1	1	2	2	3	3	28.44	1	1
34824	1.96	0.691	2.37	9.56	156	1.11	0.124	0.235	0.903	0.81	0.73	0.42	1	0	0	0	1	34	2	2	2	3	1	3	20.36	1	0
34827	0.44	0.639	0.238	3.11	62.8	0.71	0.036	0.104	0.038	0.34	1.63	0.81	1	1	1	1	3	54	2	2	1	2	2	3	23.8	2	0
34828	1.14	0.066	0.342	3.38	43.9	0.44	0.061	0.169	0.133	0.52	0.96	3.61	1	0	0	0	2	21	1	1	2	2	4	1	26.26	3	0
34838	0.37	0.179	0.402	2.79	45.3	0.4	0.083	0.222	0.208	0.87	1.48	0.94	1	0	0	0	1	31	2	2	2	3	4	3	32.21	1	0
34850	0.71	0.728	0.331	9.78	40.2	1.53	0.069	0.275	0.241	0.53	2.54	5.05	1	0	0	1	2	71	2	1	1	1	3	2	25.19	2	0
34887	1.26	0.168	0.358	3.67	47.2	1.04	0.075	0.217	0.094	0.28	2.61	0.58	1	0	0	1	1	52	1	2	1	1	3	1	33.03	2	0
34893	0.47	0.191	0.29	4.69	55.9	0.57	0.067	0.22	0.086	0.14	0.85	0.93	1	0	0	1	3	38	1	1	2	1	4	3	28.65	3	0
34914	2.04	0.366	0.824	5.58	74.7	0.72	0.111	0.355	0.121	0.29	0.95	0.76	1	0	0	0	3	28	1	2	2	1	1	1	37.19	3	0
34915	3.63	0.358	0.518	8.54	113	2.79	0.065	0.401	0.082	0.2	2.7	0.92	1	0	0	1	1	41	1	1	1	3	1	2	28.29	3	0
34928	1.07	0.585	0.319	5.66	95.3	1.69	0.078	0.15	0.046	0.27	4.61	0.23	0	0	0	0	2	85	1	1	1	2	3	3	22.13	3	0
34935	0.44	0.236	0.213	7.2	77.5	0.47	0.047	0.301	0.03	0.77	1.25	0.61	1	0	0	0	1	42	1	1	3	1	3	1	22.88	1	0
34939	4.9	0.78	0.79	9.22	53.2	0.55	0.126	0.335	0.074	0.26	0.69	0.84	1	0	0	1	1	35	1	2	2	2	3	2	39.45	3	0
34966	3.15	0.145	0.682	12.4	151	12.8	0.123	0.196	0.394	0.14	11	0.47	1	0	0	0	1	25	3	1	1	2	1	3	26.55	3	0
34987	1.35	0.075	0.389	5.64	73.5	0.77	0.178	0.235	0.541	0.14	2.46	1.31	1	0	0	0	1	25	1	1	2	2	1	1	22.19	2	0
34996	2.35	0.428	0.297	3.42	5.43	1.51	0.247	0.101	0.053	0.72	2.18	1.79	1	0	0	1	1	50	1	1	1	2	4	1	26.34	1	0
34997	2.68	1.55	0.81	6.32	110	0.91	0.148	0.348	2.512	0.55	1.91	5.45	1	1	0	0	3	78	3	1	1	2	3	3	21.3	2	0
35002	4.15	0.152	0.755	7.19	107	0.24	0.088	0.347	0.325	0.25	0.39	2.72	1	0	0	0	2	24	1	2	1	2	3	1	21.3	2	0
35015	0.9	0.131	0.613	4.47	34.2	0.07	0.023	0.177	0.073	0.14	0.46	0.47	1	0	0	0	1	28	1	2	1	2	3	1	29.82	3	0
35017	1.94	0.489	0.341	4.14	75.7	1.56	0.146	0.155	0.046	0.55	2.37	0.43	1	1	1	1	2	56	3	1	1	1	1	3	29.51	2	1
35022	2.01	0.228	1.43	6.11	102	0.48	0.077	0.262	0.397	0.28	0.81	1.57	1	0	0	0	3	29	1	2	1	1	3	1	17.79	3	0
35027	2.94	0.234	2.72	8.17	135	1.04	0.191	0.29	0.111	0.14	0.4	0.44	1	0	0	0	3	25	1	2	1	2	2	3	29.24	3	0
35038	2.14	0.058	0.15	1.05	31.6	0.32	0.023	0.068	0.015	0.53	3.29	1.5	1	0	0	0	1	37	1	2	1	1	3	3	32.48	3	0
35053	5.94	0.953	0.506	12.5	179	2.76	0.325	0.395	0.341	0.44	2.29	4.76	0	0	0	1	3	80	1	2	2	1	3	1	27.02	3	0
35058	0.94	0.95	0.733	10.5	61.8	0.66	0.103	0.283	0.516	0.23	0.8	0.57	1	0	0	0	1	32	1	2	1	1	3	1	24.16	3	0
35078	1.45	0.345	0.576	5.98	74.9	1.09	0.118	0.204	0.163	0.39	1.73	2.99	1	0	0	0	1	47	3	2	3	2	4	3	40.96	1	0
35100	0.22	1.22	0.213	6.94	20.7	0.48	0.036	0.126	0.022	0.53	1.4	3.13	0	0	0	1	3	60	3	2	2	2	4	2	28.82	3	0
35119	1.3	0.051	0.322	1.84	14	0.18	0.051	0.065	0.015	0.2	0.59	0.92	1	1	0	0	1	46	1	2	1	2	3	2	26.36	3	1
35120	0.23	0.244	0.157	1.85	62.9	0.55	0.175	0.106	0.282	0.25	1.47	0.23	0	1	0	1	3	76	3	1	2	2	4	3	33.07	3	0
35122	4.53	0.385	0.654	6.44	128	0.71	0.069	0.14	0.127	0.32	1.61	1.68	1	0	0	1	1	70	2	2	2	2	3	3	29.65	2	0
35128	6.84	0.332	0.532	5.59	68.1	0.62	0.1	0.19	0.111	0.14	0.5	1.02	1	0	0	1	1	48	1	1	1	1	1	2	24.28	3	0
35142	0.97	0.819	0.257	5.27	78.9	1.54	0.104	0.157	0.203	0.91	4.63	2.13	0	0	0	0	2	81	1	1	1	2	3	2	33.01	2	0
35151	0.79	0.351	0.195	3.4	29.2	0.84	0.023	0.101	0.036	0.7	3.01	1.27	0	1	0	1	3	81	2	2	2	2	3	2	27.34	3	0
35154	5.62	0.383	0.424	3.91	69	0.45	0.153	0.122	0.262	0.14	0.45	0.23	1	0	0	0	1	23	1	2	2	3	3	2	38.42	3	0
35157	0.08	0.137	0.062	1.01	8.06	0.13	0.023	0.069	0.015	0.34	0.68	1.92	1	0	1	1	3	46	1	1	2	3	4	1	27.83	3	0
35175	1.35	0.393	0.368	4.19	46.2	0.81	0.032	0.113	0.015	0.73	1.59	0.54	0	0	0	0	1	85	1	2	2	2	3	3	31.72	3	0
35178	1.44	0.085	0.225	1.8	48.1	0.35	0.023	0.044	0.029	0.42	2.14	3.89	1	0	0	1	3	69	1	1	1	1	4	2	22.48	2	0
35184	0.95	0.224	2.7	6.56	66.3	3.5	0.091	0.32	0.076	0.33	2.51	0.46	1	0	0	1	3	21	2	2	1	2	1	3	30.08	3	0
35185	4.37	0.792	0.707	8.03	227	1.34	0.14	0.131	0.621	0.51	1.83	0.75	1	1	0	1	3	81	3	1	2	2	3	2	26.8	2	0
35190	0.77	0.285	0.122	3.7	33.8	0.16	0.023	0.164	0.072	0.25	1.35	4.76	1	0	0	1	1	54	1	1	3	1	3	1	19.86	1	0
35198	0.87	0.059	0.098	2.86	18	0.38	0.023	0.083	0.067	0.32	2.9	8.28	1	0	1	1	1	61	2	2	1	1	5	2	23.67	3	0
35202	1.52	0.582	0.535	6.37	41.2	1.43	0.023	0.188	0.04	0.55	5.04	5.89	1	0	0	0	3	48	1	2	1	2	4	3	27.12	3	0
35203	1.92	0.505	0.715	5.36	246	3.03	0.061	0.147	0.125	0.35	2.9	2.02	1	0	0	0	1	72	2	2	2	2	3	2	18.56	3	0
35205	0.22	0.03	0.339	2.77	22.5	0.51	0.034	0.08	0.015	0.14	1.08	0.83	1	0	0	0	2	32	3	2	1	3	1	1	28.29	3	0
35206	0.44	0.36	0.216	3.65	60.3	0.65	0.071	0.11	0.075	0.6	3.43	0.23	1	1	1	1	3	68	3	1	1	2	3	3	29.71	2	0
35211	7.2	0.078	0.444	7.84	25.9	1.99	0.126	0.198	0.82	0.22	2.83	1.73	1	0	0	0	1	40	1	1	3	1	1	2	30	2	0
35218	1.5	1.23	1.12	6.14	35	1.74	0.17	0.333	0.122	0.63	2.01	1.89	1	0	0	0	1	37	1	2	2	1	5	3	22.58	3	0
35222	1.31	0.322	0.348	6.66	135	0.37	0.205	0.265	0.184	0.36	0.38	2.84	1	0	0	0	1	24	1	1	1	1	1	1	30.72	3	0
35224	1.28	0.808	0.576	9.49	117	0.62	0.148	0.731	0.16	0.2	0.75	0.39	1	0	0	0	1	20	1	2	2	3	5	2	48.47	3	0
35233	2.39	0.435	0.58	5.06	112	1.17	0.11	0.206	0.13	0.48	1.97	0.88	1	0	0	0	3	47	2	1	1	1	4	3	43.83	3	0
35241	1.41	0.074	0.207	2.08	27.3	0.79	0.092	0.07	0.186	0.25	1.3	0.8	1	0	0	0	1	30	3	2	2	3	1	3	34.78	2	0
35257	4.63	0.361	1.27	3.93	83	0.54	0.127	0.182	0.145	0.36	1.16	1.75	1	0	0	0	1	21	1	2	2	3	4	1	21.24	3	0
35260	1.02	0.175	0.231	5.18	32	0.48	0.091	0.115	0.173	0.36	1.95	1.19	0	0	0	0	3	74	3	2	1	2	3	3	24.16	3	0
35261	1.04	0.542	2.08	9.87	31.9	1.14	0.26	0.346	0.473	0.54	1.59	0.55	1	0	0	0	1	24	3	2	2	3	3	3	23.15	1	1
35263	11.2	0.116	0.143	2.98	34.5	0.18	0.042	0.115	0.04	0.14	0.92	0.49	1	0	1	0	3	27	3	2	3	2	4	1	36.17	3	0
35265	1.48	0.049	0.304	3.84	70.1	0.21	0.036	0.078	0.202	0.14	0.42	0.71	1	0	0	0	1	33	1	2	1	1	3	2	24.64	3	0
35280	3.78	0.347	0.596	6.66	16.2	1.42	0.163	0.4	0.418	0.28	0.92	0.78	1	0	0	0	2	23	3	1	2	2	4	1	21.39	3	0
35284	1.41	0.328	0.406	7.42	68.7	1.48	0.25	0.129	0.079	0.14	2.01	3.38	1	0	0	1	3	54	3	1	2	2	4	2	21.31	3	0
35290	1.89	1.73	0.738	11.9	80.9	3.66	0.088	0.189	0.083	5.24	3.98	0.23	1	0	0	1	1	52	1	1	2	2	3	1	33.58	1	1
35301	3.14	0.671	0.438	7.8	40.9	1.45	0.079	0.172	0.067	0.36	2.43	1.92	1	0	0	1	1	80	1	2	2	1	4	1	22.26	3	0
35313	0.31	0.196	0.169	1.39	5.74	0.07	0.023	0.022	0.015	1.64	2.15	0.96	1	0	0	1	1	76	3	2	2	2	5	3	21.06	1	0
35322	0.98	0.156	0.471	4.91	92.5	3.08	0.165	0.186	0.063	0.14	5.3	1.3	1	0	0	0	2	28	2	1	3	3	1	3	27.3	2	0
35325	1.97	0.795	3.29	4.56	37.2	1.59	0.293	0.193	0.048	0.72	1.95	0.58	1	0	0	0	1	35	3	2	1	2	1	1	26.47	3	0
35329	0.18	0.079	0.048	0.612	3.9	0.13	0.023	0.022	0.015	1.21	2.61	0.56	1	0	0	0	1	55	1	1	1	1	3	1	30.45	1	0
35343	2.23	0.902	1.48	6.87	28.5	1.21	0.042	0.326	0.029	0.51	1.72	7.17	1	0	0	0	2	36	1	2	1	1	4	2	30.93	2	0
35344	0.55	0.047	0.151	0.972	75.1	0.18	0.023	0.055	0.065	0.14	1.25	0.54	1	0	0	0	3	31	1	2	3	3	3	1	24.02	2	0
35345	1.47	0.374	0.259	6.42	55.7	0.53	1.55	0.241	0.111	0.23	1.47	1.12	1	0	0	0	1	48	1	1	2	1	1	1	26.64	2	0
35372	0.96	0.147	0.545	8.62	85.7	0.18	0.375	0.23	0.077	0.14	0.7	1.34	1	0	0	0	1	38	1	1	1	1	3	1	36.95	3	0
35377	2.52	0.149	1.13	8.18	52.2	0.5	0.093	0.599	0.09	0.22	0.74	1.48	1	0	0	0	1	22	2	2	3	2	3	1	23.89	3	0
35381	0.45	0.097	0.201	4.99	42.7	0.44	0.094	0.214	0.068	0.53	1.42	0.65	1	0	0	0	2	22	1	1	2	3	4	2	20.03	1	0
35408	1.94	0.476	0.259	1.92	18.8	0.64	0.057	0.067	0.015	0.89	3.48	0.4	1	0	0	0	1	66	3	1	2	2	3	3	24.62	1	0
35410	1.51	0.677	0.365	11.6	129	1.51	0.156	0.409	0.098	0.31	2.22	1.39	1	0	0	1	1	42	1	1	3	2	2	1	29.1	3	0
35413	1.67	0.12	0.153	3.73	7.88	0.33	0.023	0.15	0.015	0.39	1.45	3.67	1	0	0	1	2	63	1	1	1	1	3	1	25.53	2	0
35423	7.37	0.061	0.557	6.89	162	0.97	0.131	0.146	0.595	0.14	0.86	2.51	1	0	0	0	2	21	1	1	2	2	3	2	21.58	3	0
35432	1.5	0.179	0.275	3.52	52.1	0.65	0.053	0.127	0.057	0.23	2.21	0.87	0	0	0	1	2	84	1	1	1	1	3	3	22.14	2	0
35439	0.63	0.331	0.191	2.22	39.1	0.47	0.075	0.043	0.124	0.41	1.21	0.69	1	0	1	1	3	78	2	2	2	2	4	3	23.59	3	0
35441	3.21	0.345	0.752	6.58	103	0.95	0.095	0.234	0.374	1.12	1.28	0.95	1	0	0	0	1	20	3	1	3	1	4	1	30.29	1	0
35453	0.73	0.03	0.557	2.1	41.1	0.63	0.037	0.094	0.015	0.14	1.28	7.25	1	0	0	0	1	35	3	2	1	2	1	3	29.58	3	0
35456	0.34	0.11	0.083	0.909	11.7	0.19	0.023	0.032	0.015	0.22	0.83	0.23	1	0	0	0	3	30	3	2	1	2	1	3	27.15	3	0
35457	1.37	0.151	0.461	2.55	135	0.1	0.023	0.058	0.126	0.29	0.42	1.29	1	0	0	0	3	23	1	2	2	3	1	1	17.71	3	0
35473	1.22	1.04	0.266	3.02	65.6	2.53	0.112	0.148	0.225	2.07	4.78	3.74	1	1	1	1	1	49	1	1	2	3	4	2	28.28	1	0
35488	1.94	1.34	0.445	9.46	88.8	1.89	0.113	0.306	0.193	2.75	2.72	1.31	1	0	0	0	1	43	3	1	2	2	3	3	23.26	1	0
35493	2.16	0.989	1.27	7.28	57.8	1.52	0.176	0.278	0.08	0.57	3.16	1.98	1	0	0	1	2	69	1	1	1	1	3	3	28.09	3	0
35504	0.63	0.146	0.262	1.96	23	0.42	0.046	0.14	0.068	0.61	1.44	2.18	1	0	0	0	1	22	1	2	2	2	4	3	19.42	1	0
35509	1.23	0.5	0.573	14.6	277	1.94	0.09	0.352	0.114	0.35	1.62	0.59	1	0	0	0	1	43	2	1	3	1	1	3	33.99	2	0
35510	0.98	0.778	0.85	13.7	77.5	1.1	0.354	0.31	0.198	0.14	0.72	0.23	1	0	0	1	1	37	3	2	3	2	4	3	52.41	3	0
35548	2.05	0.911	1.43	5.69	62.7	0.49	0.122	0.223	0.105	0.26	0.64	1.36	1	0	0	0	2	24	1	2	3	2	4	2	27.83	2	0
35564	1.28	0.398	0.102	2.3	13.5	0.36	0.023	0.051	0.037	0.88	1.29	0.23	1	0	0	0	3	66	3	2	2	2	3	3	33.15	1	0
35577	1.18	0.889	0.411	9.79	97.3	0.39	0.338	0.24	0.07	0.48	0.75	0.46	1	0	0	0	1	38	2	2	2	1	3	1	21.83	1	0
35578	3.05	0.927	0.452	28.9	129	1.64	0.463	0.222	0.125	0.45	3.44	1.56	1	1	0	1	1	68	1	1	1	2	3	1	32.32	2	0
35580	3.71	0.367	0.601	7.69	340	0.32	0.046	0.414	0.152	0.14	0.67	3.23	1	0	0	0	1	44	1	2	2	1	3	1	21.67	3	0
35593	2.69	3.07	0.473	8.41	83.9	1.21	0.117	0.294	0.024	0.84	2.13	4.43	1	0	0	1	1	39	1	1	1	2	5	1	23.42	3	0
35614	1.23	0.549	0.418	3.6	52.8	0.77	0.075	0.166	0.635	0.14	1.51	2.06	1	1	1	1	2	73	2	1	1	2	3	3	23.39	3	0
35619	0.13	0.03	0.053	0.848	6.74	0.1	0.023	0.017	0.015	0.2	1.29	0.45	1	0	0	1	1	72	3	1	1	3	3	2	28.53	3	0
35621	2.14	0.2	0.462	3.63	43.5	0.59	0.144	0.136	0.254	0.47	0.73	1.78	1	0	0	0	2	20	1	2	1	1	3	2	32.56	1	0
35625	3.54	0.105	0.198	2.74	69.8	0.53	0.198	0.072	0.142	0.32	2.28	4.28	1	0	0	1	1	63	2	2	1	1	3	1	23.05	3	0
35632	0.83	0.378	0.391	9.96	101	0.77	0.095	0.314	0.056	0.14	1.3	0.5	1	0	0	0	1	41	1	1	1	1	4	1	31.88	3	0
35646	2.53	0.317	0.515	8.09	73.5	1.97	0.226	0.37	0.065	0.14	2.77	0.35	1	0	0	0	1	46	1	1	1	1	3	2	26.36	3	0
35651	1.25	0.077	0.122	1.75	20.3	0.17	0.023	0.069	0.056	0.14	0.28	2.15	1	0	0	0	2	31	1	1	1	1	3	1	31.12	3	0
35654	0.65	0.384	0.147	4.36	54.1	1.21	0.239	0.18	0.061	0.49	3.27	4.52	1	0	1	0	3	56	3	2	1	2	1	3	30.6	3	0
35659	0.64	0.871	0.36	4.77	71.2	1.23	0.045	0.454	0.039	0.8	2.8	4.96	1	0	0	1	1	53	2	2	2	1	4	3	32.28	2	0
35685	0.99	0.501	0.28	3.94	6.62	1.1	0.135	0.286	0.084	0.95	3.4	8.44	1	0	0	0	1	51	1	1	1	2	4	2	23.99	1	0
35686	0.62	1.21	0.195	7.08	21.3	0.66	0.062	0.114	0.029	0.75	1.11	0.34	0	1	1	1	2	54	2	2	2	3	3	3	35.12	1	0
35689	2.56	0.705	0.456	5.32	52.7	1.49	0.023	0.301	0.229	0.45	2.13	1.32	1	0	0	1	1	71	3	2	1	1	3	1	26.49	3	0
35690	2.51	0.312	0.604	4.84	86.6	0.42	0.084	0.21	0.092	0.14	0.62	0.95	1	0	0	0	1	35	1	2	3	1	3	1	21.97	3	0
35709	3.81	0.99	1.75	9.86	57	3.93	0.147	0.337	0.212	3.66	1.25	0.89	1	0	0	0	1	45	2	2	1	1	3	3	31.92	1	0
35737	2.63	0.229	0.171	2.46	17.9	0.62	0.023	0.06	0.015	0.25	2.5	1.01	1	0	0	1	1	77	1	2	2	1	3	3	29.63	1	0
35738	1.24	0.159	0.871	8.96	97.2	0.53	0.041	0.308	0.131	0.14	0.39	0.41	1	0	0	0	1	22	2	2	1	2	3	2	34	2	0
35756	0.46	0.628	0.214	6.08	18.3	0.27	0.023	0.122	0.023	0.81	2.01	2.26	0	1	0	1	3	80	2	2	2	2	3	2	25.7	2	0
35763	0.7	0.067	0.171	2.36	24.4	0.27	0.023	0.227	0.015	0.37	1.76	11.5	1	0	0	0	1	46	1	1	1	1	3	1	28.93	2	0
35775	0.28	0.127	0.5	1.6	7.59	0.07	0.023	0.078	0.015	0.63	0.5	1.55	1	0	0	0	1	42	1	2	1	1	1	1	31.77	2	0
35783	1.65	0.396	0.415	7.3	67.9	6.85	0.088	0.19	0.25	0.21	0.92	11.6	1	1	1	0	3	80	1	1	2	1	3	3	23.18	3	0
35788	2.16	0.385	0.541	11.4	249	2.03	0.178	0.278	0.083	0.14	1.77	0.89	1	0	0	1	2	72	1	1	1	1	3	2	28.88	3	0
35795	3.64	0.03	0.911	7.59	75.8	0.27	0.083	0.151	0.15	0.14	0.18	0.45	1	0	0	0	3	29	1	2	1	2	3	2	27.59	3	0
35798	0.56	0.21	0.239	3.77	19.4	0.57	0.04	0.098	0.087	0.28	2.29	2.55	1	1	0	1	2	65	2	1	1	3	3	3	26.08	2	1
35802	0.08	0.11	0.068	1.94	37.7	0.12	0.023	0.059	0.032	0.5	3.49	1.89	1	0	0	1	2	76	2	1	1	2	3	2	28.26	2	0
35808	0.58	0.681	0.85	12.4	115	0.73	0.138	0.233	0.114	0.39	0.92	4.94	1	0	0	0	1	50	1	2	1	1	3	1	21.57	3	0
35809	0.51	1.15	0.337	9.8	35.9	1.3	0.082	0.181	0.158	0.21	1.76	2.14	1	1	0	1	3	74	3	1	2	2	4	2	28.08	2	0
35822	2.04	0.03	0.153	2.31	34	0.47	0.042	0.092	0.029	0.14	2.12	3.1	1	0	0	0	1	42	1	1	1	2	3	1	34.84	2	0
35834	0.61	0.167	0.292	7.09	109	0.56	0.19	0.253	0.104	0.14	1.01	0.23	1	0	0	1	1	28	3	1	3	3	1	2	27.66	1	0
35846	6.08	0.401	0.456	12.6	83.6	0.79	0.699	0.361	0.115	0.14	1.28	1.86	1	0	0	0	1	39	2	1	2	1	3	1	24.38	3	0
35851	0.91	0.175	0.331	8.18	45.8	1.14	0.09	0.294	0.091	0.14	1.62	0.35	1	0	0	0	1	27	1	1	2	1	4	1	21.49	3	0
35874	1.86	0.241	0.359	4.68	41.8	1.6	0.055	0.198	0.085	0.14	3.76	0.23	1	0	0	1	1	51	2	1	1	2	3	3	26.78	3	0
35881	1.81	1.2	1.27	9.26	196	2.84	0.256	0.343	0.343	0.44	2.24	0.23	1	0	0	0	3	24	2	2	1	2	1	1	22.14	2	0
35890	1.66	0.183	0.322	3.55	27.8	0.44	0.07	0.212	0.04	0.23	0.49	0.43	1	0	0	0	3	23	2	2	3	2	1	3	32.13	3	0
35935	4.45	0.392	4.64	5.74	124	0.7	0.052	0.268	0.436	0.66	1.27	0.23	1	0	0	0	1	21	3	2	2	1	5	1	31.06	3	0
35937	1.63	0.209	0.382	4.31	88.8	0.71	0.059	0.197	0.046	0.24	2.37	1.89	0	0	1	1	3	54	3	2	1	2	2	1	29.52	3	0
35942	4.23	0.051	0.172	2.37	49.6	0.2	0.023	0.059	0.06	0.14	0.94	1.09	1	0	0	0	1	25	1	1	3	2	3	1	21.65	2	0
35956	0.54	0.347	0.316	5.04	89.4	0.49	0.116	0.301	0.205	0.22	0.66	3.3	1	0	0	0	1	37	3	2	2	1	4	2	38.81	3	0
35957	0.2	0.359	0.118	0.936	9.49	0.11	0.034	0.028	0.051	2.07	2.18	0.34	1	0	0	1	2	59	3	2	2	2	3	2	33.1	1	0
35959	0.52	0.076	0.091	2.13	22	0.15	0.023	0.06	0.015	0.35	0.66	1.08	1	0	0	0	1	43	1	2	1	1	2	2	27.27	1	0
35963	0.31	0.067	0.189	4.04	12.2	0.27	0.023	0.043	0.232	0.27	1.54	0.47	1	0	1	1	3	74	3	2	2	2	1	2	25.09	3	0
35972	2.68	1.97	0.333	6.89	27	2.14	0.139	0.199	0.029	0.36	3.12	0.72	1	0	1	1	1	61	1	1	1	2	3	3	31.78	2	0
35977	0.48	0.727	0.278	10	33.4	0.86	0.034	0.135	0.051	0.45	1.92	3.58	1	0	0	1	2	66	2	1	1	1	3	1	29.21	2	0
35980	0.48	0.03	0.11	2.78	9.84	0.24	0.04	0.082	0.015	0.28	1.86	1.55	1	0	0	1	1	54	1	2	2	1	3	1	22.48	3	0
35990	5.38	0.399	0.68	3.96	25.6	0.65	0.137	0.094	0.275	0.61	0.73	0.73	1	0	0	0	2	22	2	2	1	2	3	3	24.29	1	0
35991	4.35	0.646	0.562	3.45	50	0.46	0.091	0.151	0.044	1	0.69	0.81	1	0	0	0	1	28	2	2	1	1	3	3	26.49	1	0
36005	1.02	0.071	0.253	1.66	27.8	0.57	0.043	0.121	0.048	0.14	2.73	0.23	1	0	0	0	1	20	1	1	2	2	3	1	23.31	3	0
36006	1.44	0.064	0.426	2.63	26.6	0.32	0.023	0.1	0.028	0.2	1.54	8.03	1	0	0	0	3	25	1	2	2	2	3	1	26.74	3	0
36014	1.03	0.606	0.373	4.92	81.8	1.17	0.038	0.123	0.083	0.55	2.04	1.04	1	0	0	0	1	49	3	1	1	1	2	3	25.35	2	0
36031	4.09	0.457	0.762	8.4	92.3	1.02	0.16	0.191	0.426	0.23	0.76	0.44	1	0	0	0	1	27	1	2	1	3	1	1	20.12	2	1
36038	1.24	0.17	0.368	2.33	45.5	0.26	0.023	0.159	0.04	0.23	1.38	1.28	1	0	0	1	2	55	1	1	2	1	3	1	43.23	3	0
36040	3.3	0.299	0.748	5.28	100	2.45	0.05	0.206	0.12	0.2	2.26	0.5	1	0	0	0	3	28	1	2	2	2	1	3	28.78	3	0
36045	1.03	0.174	0.389	4.8	30	0.55	0.054	0.164	0.044	1.09	1.51	3.63	1	0	0	0	1	20	1	2	2	1	3	1	25.86	1	0
36058	0.82	0.345	0.287	5.51	10.3	0.91	0.058	0.324	0.015	0.14	2.13	4.18	1	0	0	1	2	69	3	2	2	2	4	2	41.61	3	0
36059	0.79	0.094	0.42	6.03	58.8	0.86	0.063	0.151	0.16	0.29	1.56	0.23	1	0	0	0	1	37	2	1	1	2	1	2	32.37	3	1
36060	1.63	0.291	0.403	10.3	77.6	1.32	0.177	0.406	0.187	0.22	2.29	0.51	1	0	0	0	1	30	1	1	1	1	3	1	24.48	1	0
36065	0.08	0.03	0.079	0.537	7.67	0.07	0.023	0.016	0.015	0.33	1.04	0.42	1	0	0	0	2	55	1	2	1	1	3	1	23.07	3	0
36077	2.6	0.484	0.472	7.7	27.5	0.76	0.058	0.428	0.111	0.34	1.16	1.34	1	0	0	0	1	72	2	2	1	2	3	1	27.83	3	0
36093	0.51	0.287	0.133	2.79	24.6	0.23	0.107	0.071	0.032	0.21	0.9	0.34	1	0	0	0	3	31	1	1	1	1	3	1	29.91	3	0
36099	2.18	0.194	1.07	5.26	35.6	0.15	0.053	0.129	0.058	0.14	0.34	1.35	1	0	0	0	3	30	1	2	1	1	3	2	36.69	3	0
36104	1.77	0.658	0.877	10.2	18.9	0.45	0.05	0.345	0.041	0.22	0.44	0.54	1	0	0	0	3	22	1	2	2	2	4	3	36.26	3	0
36108	0.81	0.637	0.424	3.82	83.3	1.39	0.095	0.095	0.131	0.14	2.24	0.62	1	1	0	0	3	76	3	1	2	3	1	3	27.46	3	0
36119	0.08	0.124	0.106	2.33	41	0.26	0.032	0.036	0.026	0.39	1.57	8.52	1	1	1	1	3	83	2	1	1	3	2	3	29.24	2	0
36133	3.13	0.125	0.316	1.91	7.37	0.24	0.023	0.119	0.015	0.63	1.1	0.67	1	0	0	0	1	43	1	2	1	1	4	1	34.59	3	0
36134	2.19	0.664	0.416	6.42	154	0.86	0.067	0.182	0.325	0.29	0.74	0.84	1	0	0	0	3	44	1	2	2	2	4	1	34.89	3	0
36159	0.6	0.324	0.357	3.85	14.7	1.08	0.109	0.075	0.029	0.3	3.3	1.73	0	1	1	1	1	65	3	1	1	2	4	3	31.54	3	0
36164	0.92	0.196	0.219	4.85	33.4	0.57	0.069	0.332	0.071	0.14	1.55	2.05	1	0	0	0	2	46	1	1	1	1	3	1	28.14	3	0
36186	1.81	0.07	0.677	5.71	104	0.72	0.065	0.151	0.093	0.14	1.25	0.65	1	0	0	0	1	22	3	1	2	2	2	1	21.86	3	0
36213	2.04	0.155	0.375	8.2	133	1.01	0.069	0.107	0.245	0.14	1.36	2.67	1	0	0	1	2	58	1	1	1	1	4	1	26.85	3	0
36218	1.1	0.371	0.337	37.7	59.3	0.9	0.042	0.206	0.18	0.34	1.82	0.96	1	0	0	0	1	54	1	2	2	1	4	2	29.38	3	0
36229	0.47	0.03	0.192	1.57	18.8	0.14	0.023	0.034	0.031	0.22	1.64	7.15	1	0	0	0	1	30	1	1	1	1	3	1	26.76	2	0
36232	2.75	0.182	0.433	5.33	71.8	0.57	0.103	0.12	0.235	0.14	0.79	0.55	1	0	0	0	1	30	2	2	2	1	3	2	36.98	3	0
36241	1.54	0.284	0.349	13.4	127	0.96	0.138	0.361	0.3	0.56	0.68	0.8	1	0	0	0	1	24	1	2	1	1	3	2	36.8	2	0
36257	6.46	0.688	0.676	8.79	178	2.11	0.12	0.212	0.613	0.85	2.19	0.23	1	0	0	1	1	55	1	2	1	2	3	3	32.08	1	0
36265	4.71	1.62	0.7	6.33	472	2.96	0.737	0.286	0.974	0.57	6.9	2.33	1	0	0	1	1	54	1	2	1	1	4	3	21.82	2	0
36267	2.93	0.111	0.331	4.24	37.4	0.4	0.036	0.304	0.05	0.3	0.72	1.04	1	0	0	0	1	20	2	2	2	1	4	1	23.49	3	0
36281	4.74	1.01	0.872	6.05	56	0.81	0.09	0.164	0.074	0.45	1.08	1.12	1	0	1	1	2	66	1	2	2	2	4	2	33.29	3	0
36291	1.13	0.566	0.41	4.6	10.7	2.35	0.074	0.098	0.028	1.03	5.49	0.23	1	0	0	0	1	72	2	1	2	2	4	3	21.81	1	0
36292	0.83	0.196	0.917	4.22	62.8	4.09	0.023	0.209	0.11	0.14	10.5	1.54	1	0	0	0	1	46	3	1	1	2	1	3	27.77	3	0
36311	2.61	0.505	0.48	7.67	191	1.86	0.279	0.195	0.194	0.14	3.02	1.03	1	0	0	1	1	63	3	1	1	1	3	1	25.98	3	0
36319	0.8	1.64	0.744	7.55	206	2.55	0.088	0.361	0.242	0.99	3.13	2.04	1	0	0	0	1	65	1	1	2	2	3	3	29.5	1	0
36321	1.03	0.165	0.247	2.99	26.5	0.2	0.023	0.112	0.045	0.14	0.98	1.66	1	0	0	0	1	22	1	2	2	2	4	1	24.31	3	0
36333	0.95	0.305	0.211	2.06	14.1	0.36	0.023	0.029	0.11	0.35	1.36	2.32	1	0	0	1	3	79	2	2	1	2	3	3	22.58	3	0
36335	0.77	0.103	0.125	1.7	11.5	0.21	0.023	0.142	0.024	0.47	1.05	4.18	1	0	0	0	1	46	1	2	2	1	3	2	18.26	3	0
36336	1.97	0.062	0.546	2.81	32.2	0.25	0.032	0.127	0.05	0.14	0.71	3.25	1	0	0	1	1	45	1	2	1	1	3	1	21.56	3	0
36343	0.27	0.126	0.112	1.34	20.4	0.11	0.023	0.029	0.069	0.72	1.36	0.71	1	0	0	0	1	48	1	1	2	2	3	2	24.11	1	0
36344	7.18	0.41	0.394	3.59	58.3	0.89	0.102	0.14	0.115	3.56	1.87	1.34	1	0	0	0	1	36	3	1	2	1	3	3	29.3	1	0
36346	0.08	0.345	0.125	1.94	52.2	0.9	0.023	0.076	0.117	0.3	2.8	0.23	0	0	0	0	3	85	1	1	1	2	3	3	21.68	3	0
36350	0.69	0.065	0.3	2.01	14.5	0.23	0.048	0.086	0.049	0.53	1.21	0.23	1	0	0	0	1	24	2	2	2	2	3	2	27.07	1	0
36370	1.11	0.183	0.952	4.22	81.2	1.17	0.039	0.098	0.067	0.25	1.63	0.23	1	0	0	0	3	24	1	2	1	3	1	2	24.63	3	0
36379	0.48	0.256	0.148	3.57	21.6	0.69	0.042	0.144	0.043	0.44	2.62	3.49	1	0	0	0	1	58	2	2	1	1	1	1	24.38	3	0
36389	0.39	0.054	0.077	1.64	8.56	0.23	0.023	0.189	0.023	0.21	1.69	12.1	1	0	0	0	1	49	1	2	1	1	3	1	20.98	2	0
36398	0.9	0.824	0.361	9.19	145	1.6	0.053	0.139	0.093	0.8	4.2	1.08	1	0	0	0	1	63	3	1	1	2	3	3	18.5	1	0
36405	0.6	0.186	0.176	2.47	40	1.14	0.036	0.092	0.054	0.14	3.47	6.46	1	0	0	0	1	54	1	1	1	2	4	1	25.07	3	0
36408	0.21	0.03	0.062	1.4	7.37	0.07	0.071	0.072	0.524	0.14	1.91	1.34	1	1	1	1	1	42	1	1	1	3	1	3	46.04	2	0
36427	1.04	0.51	0.354	7.22	23.1	0.86	0.066	0.192	0.024	0.28	2.05	3.02	1	0	0	0	1	53	1	2	1	1	3	1	25.13	3	0
36432	0.2	0.198	0.225	6.1	36.6	0.79	0.023	0.105	0.052	0.51	4.05	1.12	0	1	0	1	1	84	2	2	2	2	3	2	33.02	2	0
36436	2.05	0.566	0.328	3.65	73.6	0.83	0.099	0.442	0.116	0.34	2.16	1.54	1	0	0	0	3	49	1	2	2	1	4	2	36.28	3	0
36444	6.66	0.168	1.84	15.2	57.1	0.55	0.084	0.43	0.08	0.14	0.45	0.6	1	0	0	0	1	22	1	2	2	2	3	2	22.24	3	0
36454	0.27	0.03	0.148	1.43	4.52	0.07	0.023	0.034	0.015	0.21	0.18	1.73	1	0	0	0	1	24	1	2	2	1	3	2	21.54	3	0
36465	1.75	0.193	0.513	3.77	23.2	0.69	0.034	0.181	0.015	0.27	1.74	1.7	1	0	1	1	1	32	2	2	3	2	1	1	32.94	3	0
36472	0.49	0.049	0.146	2.24	15	0.23	0.023	0.05	0.015	0.27	1.38	1.01	0	0	0	1	3	82	3	2	2	2	3	2	30.34	3	0
36483	1.67	0.51	0.468	19.3	64.7	0.74	0.154	0.229	0.178	0.49	1.49	0.4	1	0	0	1	1	50	1	2	2	1	3	1	28.44	3	0
36484	0.69	0.238	0.266	2.71	32.4	0.63	0.034	0.071	0.286	0.5	3.44	0.89	1	0	0	1	2	85	2	1	1	2	3	2	25.03	3	0
36493	1.29	0.145	0.137	1.58	15.4	0.3	0.023	0.061	0.024	0.26	0.78	1.57	1	0	0	0	1	47	2	2	2	2	2	3	46.39	3	1
36498	2.04	0.126	0.46	6.43	46.1	1.11	0.072	0.163	0.127	0.33	1.54	1.35	1	0	0	0	1	26	1	1	2	1	1	1	31.4	1	0
36499	1.66	0.515	0.322	63.7	25.9	0.64	0.023	0.109	0.044	0.86	2.86	1.74	1	0	0	0	2	54	3	1	1	1	3	3	25.6	1	0
36515	10.2	0.795	0.707	13.1	36	0.82	0.063	0.265	0.091	0.33	0.64	0.23	1	0	0	0	1	44	1	2	2	2	3	2	27.18	2	0
36517	2.98	0.156	0.524	8.26	94.9	0.53	0.137	0.281	0.134	0.14	0.44	0.23	1	0	0	0	3	26	1	2	3	2	4	1	34.72	3	1
36518	5.47	0.906	0.586	13.7	106	1.58	0.052	0.256	0.133	1.14	2.23	3.34	1	0	0	1	1	63	3	1	2	1	3	3	25.66	1	0
36523	1.73	0.223	0.636	10	59.1	1.15	0.048	0.269	0.044	0.14	1.05	2.08	1	0	0	0	3	45	3	2	1	2	3	3	16.91	2	0
36528	3.06	0.368	0.675	6.17	74	3.11	0.087	0.112	0.091	0.42	5.31	0.23	1	0	0	1	1	78	1	1	1	2	1	1	29.72	3	0
36530	0.44	0.03	0.405	3.1	6.46	0.18	0.061	0.041	0.026	0.74	0.87	3.06	1	0	0	0	1	26	1	2	2	1	3	1	22.44	1	0
36532	0.92	0.365	0.451	31.3	87.5	0.56	0.082	0.325	0.141	0.33	0.65	0.84	1	0	0	0	1	26	1	2	3	1	3	1	23.56	3	0
36538	0.35	0.189	0.364	4.48	17.5	0.3	0.023	0.228	0.015	0.49	0.81	0.34	1	0	0	0	1	43	1	2	2	1	1	1	26.4	3	0
36545	0.68	0.1	0.145	3.02	36.5	0.25	1.02	0.106	0.034	0.3	1.16	0.42	1	0	0	0	1	26	3	1	3	3	1	1	25.49	1	0
36548	0.82	0.603	0.21	2.88	24.3	0.41	0.038	0.096	0.035	0.86	1.52	0.7	0	0	0	0	2	77	2	2	2	2	3	3	32.97	2	0
36582	1.04	2.25	0.623	6.29	31.6	2.86	0.151	0.176	0.184	0.84	3.16	0.42	1	1	0	1	3	61	3	2	2	3	4	3	19.38	2	0
36601	1.54	0.385	0.195	5.41	35.6	0.43	0.12	0.15	0.092	1.05	1.24	4.51	1	0	0	0	1	46	1	2	2	1	3	1	29.51	1	0
36625	0.31	0.499	0.244	2.64	41.9	0.9	0.051	0.101	0.022	0.14	1.58	0.79	1	0	0	0	3	36	3	2	3	3	1	3	36.6	3	0
36628	1.53	0.139	0.743	6.59	60.3	1.2	0.081	0.231	0.135	0.49	0.79	2.12	1	0	0	0	1	42	1	2	1	1	4	2	24.72	3	0
36645	0.54	0.599	0.325	8.32	39.6	0.88	0.066	0.44	0.046	0.4	1.77	1.35	1	0	0	1	1	58	3	2	1	2	3	2	31.98	3	0
36647	4.35	0.559	0.789	6.1	51.8	0.9	0.038	0.404	0.042	0.25	1.5	1.78	1	0	1	1	1	75	2	1	1	1	4	2	24.34	2	0
36649	0.89	0.097	0.195	5.32	40	0.22	0.033	0.109	0.089	0.14	0.71	0.61	1	0	1	0	1	69	2	2	1	1	1	2	32.21	3	0
36666	1.38	0.03	0.085	1.2	7.33	0.14	0.023	0.057	0.024	0.14	1.01	4.01	1	0	0	0	1	20	2	2	1	1	3	1	17.55	3	0
36687	7.96	0.383	0.698	7.6	123	1.26	0.16	0.217	0.553	0.14	0.65	1.21	1	0	0	0	1	32	1	2	1	1	3	3	27.09	2	0
36690	1.66	0.473	0.353	3.64	35.5	0.66	0.099	0.064	0.073	0.4	1.33	0.23	0	1	0	1	3	85	3	2	2	2	3	3	21.83	3	1
36698	1.59	0.104	0.248	2.51	25	0.51	0.051	0.116	0.059	0.14	1.5	2.45	1	0	0	0	1	27	1	1	2	1	4	1	25.79	3	0
36723	4.47	0.158	0.502	3.78	76.5	0.33	0.079	0.206	0.086	0.14	0.51	1.7	1	0	1	1	3	36	1	1	1	2	1	1	42.01	3	0
36729	1	0.238	0.136	2.11	57	0.18	0.023	0.044	0.015	0.68	1.1	1.03	1	1	0	0	1	85	1	2	2	2	3	2	29.89	3	0
36739	0.41	0.203	0.115	1.54	36.8	0.2	0.023	0.038	0.088	0.49	1.15	0.42	1	0	0	1	3	62	1	2	2	2	1	3	25.9	3	0
36741	1.11	0.132	0.27	3.56	80.6	0.57	0.148	0.299	0.085	0.29	1.22	1.26	1	0	0	0	1	21	2	1	2	1	3	3	26.42	1	0
36743	5.52	0.706	1.05	7.51	65.6	0.5	0.165	0.315	0.117	0.29	0.66	8.74	1	0	0	0	1	30	2	2	1	1	4	1	24.85	3	0
36747	0.67	0.43	0.282	5.4	53.1	1.04	0.071	0.085	0.047	0.46	2.45	0.23	1	0	0	0	3	64	3	2	1	3	1	2	33.4	1	0
36749	0.93	0.261	0.726	2.06	11.1	0.22	0.023	0.064	0.015	0.42	1.15	0.61	1	0	0	1	1	50	2	2	1	2	3	2	35.27	2	0
36753	0.26	1.25	0.352	6.22	54.5	0.86	0.067	0.169	0.045	0.61	1.37	0.89	1	0	0	1	3	59	2	2	1	2	1	3	44.68	3	1
36773	0.15	0.185	0.029	2.22	4.52	0.15	0.023	0.049	0.015	0.68	2.42	1.33	1	0	0	1	1	54	1	2	2	1	3	1	29.12	2	0
36779	1.39	0.258	0.817	3.7	55.8	5.78	0.119	0.147	0.076	0.23	6.19	0.7	1	0	1	1	3	53	3	2	1	3	1	3	38.5	3	0
36783	1.7	0.66	0.709	6.76	130	0.89	0.127	0.218	0.37	0.28	0.6	1.26	1	0	0	0	1	35	2	2	1	2	4	3	36.97	3	0
36792	2.11	0.575	0.621	5.28	153	1.6	0.115	0.223	0.168	0.35	1.67	1.77	1	0	0	0	2	25	3	1	1	3	1	3	26.61	3	0
36798	1.33	0.212	0.242	2.21	21.8	0.64	0.062	0.144	0.039	0.24	1.03	1.61	1	0	0	0	1	51	2	2	1	1	4	2	27.43	3	0
36801	1.98	0.2	0.524	6.24	56.8	0.47	0.072	0.191	0.191	0.4	0.63	5.82	1	0	0	0	3	46	1	2	2	1	3	1	24.41	3	0
36804	2.09	0.03	1.49	1.94	12.7	0.07	0.023	0.086	0.015	0.43	0.54	1.67	1	0	0	0	3	20	1	2	2	2	3	3	25.75	3	0
36809	1.08	1.06	0.231	9.72	35	0.75	0.068	0.328	0.044	0.86	0.99	0.7	1	0	0	0	2	78	1	1	1	2	3	3	21.44	2	0
36813	0.94	0.213	0.357	8.52	35.8	0.5	0.761	0.22	0.015	2.4	1.17	0.23	1	0	0	0	1	25	2	1	1	2	3	1	20.21	1	0
36814	2.9	0.224	0.381	4.93	88.6	0.55	0.088	0.213	0.175	0.24	0.7	0.23	1	0	0	0	1	28	1	1	3	2	3	2	26.4	2	0
36815	5.3	0.03	0.448	2.56	19	0.3	0.023	0.055	0.027	0.14	2.15	0.87	1	0	0	1	1	42	1	1	2	3	3	1	26.85	3	1
36819	0.61	0.206	0.108	2.53	33.7	0.34	0.208	0.196	0.336	0.14	0.95	0.68	1	0	0	1	1	39	2	1	2	2	4	2	38.22	1	0
36830	1.23	0.084	0.275	3.94	28.3	0.46	0.048	0.193	0.022	0.14	1.34	2.13	1	0	0	1	3	60	1	1	1	1	4	2	29.12	3	0
36832	0.46	0.03	0.105	1.81	16.3	0.33	0.023	0.074	0.037	0.44	2.31	1.44	1	0	0	1	1	77	1	2	1	2	3	3	23.47	2	0
36838	0.84	0.939	0.397	15.8	45.6	0.88	0.093	0.246	0.086	0.56	1.19	2.19	1	1	0	0	1	69	2	1	2	2	3	2	25.44	2	0
36849	0.24	0.88	0.22	6.09	46.8	1.29	0.06	0.241	0.245	0.35	4.29	0.71	1	0	1	0	3	80	1	1	2	2	3	3	28.96	2	0
36894	1.31	0.115	0.288	3.18	56.8	0.76	0.214	0.07	0.305	0.84	1.62	2.98	1	0	0	0	2	20	3	1	1	2	3	1	17.72	1	0
36907	1.78	0.188	0.191	5.19	55.8	0.19	0.105	0.17	0.116	0.34	0.78	1.27	1	0	0	0	1	27	2	2	2	1	3	1	19.4	3	0
36916	5.89	0.198	0.573	6.81	33.6	1.78	0.123	0.266	4.562	0.25	2.06	1.74	1	0	0	0	1	40	3	1	1	2	1	3	33.63	2	1
36931	0.68	0.555	0.253	6.52	50.8	1.1	0.075	0.236	0.088	0.3	2.91	1.28	1	0	0	1	2	81	1	1	2	2	3	2	30.12	3	0
36934	0.76	0.03	0.244	2.47	39.9	0.28	0.023	0.12	0.032	0.14	1.06	0.55	1	0	0	0	1	33	1	2	1	2	3	1	23.04	3	0
36935	1.34	0.093	0.155	2.6	17.2	0.07	0.023	0.157	0.116	0.14	0.34	4.48	1	0	0	1	1	34	1	2	1	1	4	1	44.25	3	0
36946	1.26	0.195	0.396	8.48	46.4	0.76	0.091	0.297	0.034	0.14	1.04	1.73	1	0	0	0	1	32	1	2	1	1	2	1	23.23	3	0
36947	2.21	0.571	0.514	7.73	29.7	0.6	0.023	0.223	0.046	1.06	1.86	0.23	1	1	0	0	2	85	2	2	2	3	3	3	26.2	3	0
36952	0.73	0.294	0.251	2.89	99.2	0.57	0.023	0.124	0.049	0.51	2.09	2.2	1	0	0	0	3	78	1	1	1	2	3	3	21.18	2	0
36984	2.63	0.197	0.396	5.72	46.3	0.68	0.092	0.182	0.046	0.38	1.83	1.37	1	0	0	0	1	38	2	1	1	2	1	2	24.86	3	0
36986	3.16	0.667	0.667	5.43	79.5	0.34	0.058	0.274	0.064	0.66	0.84	0.53	1	0	1	0	3	50	3	2	1	2	4	2	38.56	1	0
36992	7.46	0.458	10.2	7.24	79	0.66	0.062	0.377	0.042	0.44	0.87	2.11	1	0	1	1	1	49	1	2	1	2	4	1	30.53	3	0
36998	1.13	0.475	0.283	7.56	16.5	0.67	0.083	0.391	0.058	0.24	1.47	8.93	0	0	0	0	1	55	1	2	1	1	3	1	25.87	2	0
37001	6.48	0.624	0.428	8.54	94	0.64	0.084	0.616	0.162	0.14	0.64	1.02	1	0	0	0	1	32	2	2	1	2	4	1	39.44	3	0
37002	2.32	0.083	0.294	12.8	29.3	1.16	0.086	0.25	0.113	0.23	1.44	1.15	1	0	0	1	2	23	1	1	3	1	3	2	35.33	3	0
37025	0.17	1.11	0.21	3.52	63.4	1.28	0.052	0.099	0.094	0.88	2.78	0.23	1	0	0	0	3	83	2	1	1	2	3	2	21.13	3	0
37031	1.41	0.411	0.197	1.43	26.7	1.21	0.046	0.065	0.629	1.7	6.84	0.58	1	1	0	1	1	53	1	2	1	1	4	2	40.55	1	1
37038	1.21	0.271	0.243	3.49	14	0.39	0.046	0.21	0.015	0.21	1.56	1.05	1	0	0	0	3	49	2	1	2	1	4	1	27.61	3	0
37046	1.47	0.354	1.05	3.04	15.9	0.49	0.043	0.129	0.047	0.93	0.83	0.23	1	0	0	0	1	45	1	2	1	1	4	1	35	3	0
37049	0.88	0.478	0.448	4.3	74.4	0.9	0.07	0.141	0.206	0.24	1.07	1.47	1	0	0	0	3	70	3	2	1	1	1	2	22.75	3	0
37056	2.89	1.08	0.433	7.42	96	2.76	0.172	0.222	0.093	0.43	3.5	1.48	1	0	0	0	2	45	1	1	1	3	3	3	31.24	3	0
37088	0.73	0.788	0.431	2.61	14.7	0.49	0.067	0.062	0.015	0.85	1.78	1.6	1	0	0	1	2	66	3	1	1	1	5	3	28.86	2	0
37092	3.28	0.289	1.28	7.09	107	0.92	0.178	0.264	0.169	0.14	0.88	0.23	1	0	0	0	1	26	2	2	1	1	1	2	26.16	3	0
37115	1.04	0.296	0.206	2.56	56.1	0.47	0.101	0.053	0.057	0.42	0.98	0.33	1	0	1	1	2	62	3	2	1	3	1	3	30.88	3	1
37120	9.29	0.1	0.727	4.08	286	1.68	0.239	0.18	0.157	1.01	1.73	0.66	1	0	0	0	1	46	3	2	1	2	1	3	30.08	1	0
37128	0.55	0.874	0.349	4.86	139	4.78	0.057	0.113	0.152	0.48	11.4	0.67	1	0	0	0	2	64	3	2	2	1	4	3	29.77	2	1
37129	12.3	0.258	0.223	7.66	47.5	2.67	0.147	0.27	0.092	0.3	5.43	0.88	1	1	1	1	2	61	3	1	1	2	1	3	33.01	3	0
37134	2.09	0.635	0.537	4.82	76.8	1.98	0.132	0.23	0.156	0.27	3.8	1.66	1	1	0	1	3	75	1	2	1	1	3	3	43.17	3	0
37154	2.32	0.166	0.388	2.12	18.7	0.23	0.043	0.069	0.031	0.55	1.11	1.53	1	1	1	1	3	83	2	2	1	2	3	2	29.27	3	0
37174	2.92	0.088	0.143	4.89	22.2	0.68	0.023	0.113	0.015	0.14	1.98	0.71	1	0	0	1	3	63	2	2	1	1	4	2	30.77	3	0
37176	1.02	0.35	0.386	6.32	172	0.43	0.023	0.182	0.652	0.36	0.94	0.55	1	0	0	1	1	38	1	1	1	1	5	2	32.66	3	0
37206	5.12	0.309	1.51	4.49	111	1.25	0.137	0.198	0.424	1.86	1.36	0.23	1	0	0	0	1	33	1	1	3	3	3	3	25.36	1	0
37218	2.21	0.399	0.253	12.6	69.6	2.45	0.334	0.243	0.179	0.26	2.84	0.23	1	0	1	1	3	80	3	2	2	2	3	3	40.86	3	0
37238	5.7	0.211	0.417	6.14	87.8	0.63	0.364	0.25	0.512	0.14	0.83	0.83	1	0	0	0	2	36	1	1	1	1	1	3	33.77	3	0
37239	0.91	0.152	0.375	2.4	58.4	0.12	0.023	0.116	0.03	0.31	0.57	0.23	1	0	0	0	3	20	2	1	2	1	1	1	21.81	3	0
37240	0.3	0.14	0.279	3.54	25.8	0.52	0.023	0.099	0.043	0.14	1.55	1.59	1	0	0	0	1	34	3	2	1	3	1	3	27.56	3	0
37243	9.13	0.269	0.537	21.2	63.6	1.81	0.057	0.391	0.042	0.25	1.57	1	1	0	0	0	1	64	2	1	1	1	3	2	23.91	2	0
37244	4.64	0.225	0.28	4.95	45.8	0.86	0.243	0.226	0.071	2.94	0.86	0.92	1	0	0	0	1	22	1	2	2	2	2	1	20.57	1	0
37256	1.68	0.809	0.502	5.9	94.1	3.17	0.252	0.732	0.13	0.28	5.36	0.39	1	1	0	1	3	53	1	1	2	3	1	2	22.31	2	1
37275	1.03	0.244	0.25	5.18	43.4	0.81	0.064	0.155	0.057	0.14	1.15	0.9	1	0	0	1	2	61	1	1	3	1	4	2	27.89	2	0
37295	1.33	0.241	0.542	7.81	106	0.72	0.133	0.366	0.075	0.3	1.26	0.88	1	0	0	0	1	22	1	1	2	2	2	2	32.61	3	0
37296	12.4	0.272	2.5	8.52	207	1.11	0.11	0.512	0.127	0.24	0.75	2.85	1	0	0	0	3	46	3	2	2	3	4	1	30.38	3	0
37301	2.35	0.03	0.367	3.22	12.7	0.37	0.034	0.102	0.054	0.34	1.44	1.27	1	0	0	0	1	53	1	2	1	2	3	2	29.48	2	0
37302	2.22	0.237	1.94	4.44	52.1	0.74	0.049	0.131	0.134	0.39	1.61	0.48	1	0	0	0	1	22	2	2	2	2	1	2	22.19	2	0
37312	0.93	0.888	0.361	5.02	37.7	1.01	0.077	0.131	0.029	0.49	1.87	1.24	1	0	0	1	1	76	1	1	1	1	3	2	31.21	2	0
37316	0.53	0.171	0.459	5.86	195	1.48	0.116	0.236	0.057	0.14	1.07	0.67	1	0	0	0	1	32	2	1	3	3	1	3	27.85	2	0
37326	0.75	0.107	0.213	3	13	0.25	0.023	0.076	0.07	0.54	1.25	0.5	1	0	0	1	1	41	1	2	2	1	3	3	34.07	1	0
37329	0.41	0.638	0.217	7.19	34.6	0.26	0.051	0.179	0.015	0.96	1.54	1.64	1	0	0	0	3	69	3	2	3	2	3	2	34.47	1	0
37330	0.87	0.207	0.697	5.45	154	0.3	0.023	0.135	0.038	0.42	1.28	0.47	1	0	0	1	2	68	1	2	1	2	3	3	20.17	2	0
37332	0.98	0.052	0.154	0.658	2.29	0.11	0.023	0.015	0.015	1.33	3.22	0.23	1	1	0	1	1	46	3	2	2	1	3	2	25.66	1	0
37333	2.59	0.088	0.274	7.02	109	0.55	0.06	0.184	0.084	0.28	1.16	3.49	1	0	0	0	1	30	1	1	2	1	3	1	26.33	3	0
37339	1.82	0.242	0.77	12.6	45.1	1.38	0.066	0.195	0.168	0.25	2.05	0.61	1	0	0	0	1	40	3	1	1	1	1	2	36.59	2	0
37350	5.18	0.31	0.311	3.15	15.4	1	0.037	0.098	0.108	0.69	3.14	0.5	1	0	0	0	1	60	1	2	2	2	3	3	23.15	2	0
37353	3	0.102	0.433	4.86	52.9	0.51	0.062	0.077	0.151	0.14	1.83	3.92	1	0	0	0	1	45	3	1	1	3	1	3	24.4	3	0
37361	1.44	1.1	0.291	9.65	132	0.53	0.035	0.3	0.184	0.85	1.15	1.55	1	0	0	1	3	66	1	2	1	1	5	2	23.33	3	0
37367	2.55	0.327	0.36	13.2	20.3	1.05	0.08	0.193	0.034	0.36	2.18	3.45	1	0	0	0	1	54	1	1	1	2	3	1	30.27	2	1
37369	0.34	0.86	0.421	7.15	21.2	1.7	0.045	0.567	0.023	0.34	3.04	0.62	1	0	0	0	3	70	1	1	1	1	4	3	26.8	2	0
37374	4.5	0.251	0.493	4.67	102	0.33	0.101	0.135	0.144	0.21	0.72	0.41	1	0	0	1	3	31	1	1	1	1	3	3	22.27	3	0
37393	2.47	0.03	0.53	3.79	59.1	0.28	0.075	0.145	0.156	0.22	0.71	1.88	1	0	0	0	1	31	1	2	1	1	3	3	41.5	3	0
37395	2.04	0.251	0.45	4.98	35	1.15	0.108	0.092	0.052	1.52	2.2	0.47	1	0	0	0	1	22	3	1	2	3	1	1	22.28	1	0
37400	3.22	0.06	0.477	3.9	69.6	0.22	0.049	0.128	0.154	0.14	0.47	0.77	1	0	0	1	1	42	1	2	1	1	3	2	21.8	3	0
37410	0.61	0.045	0.157	2.34	21.8	0.15	0.036	0.101	0.083	0.25	0.95	5.32	1	0	0	0	1	29	1	1	1	1	3	1	25.13	3	0
37418	3.11	0.053	0.434	3.38	67.2	0.57	0.074	0.135	0.16	0.59	0.7	0.23	1	0	0	0	1	21	1	2	2	2	3	3	20.49	1	0
37457	1.99	0.819	0.455	4.34	54.6	1.12	0.023	0.17	0.041	1.36	2.27	8.53	1	0	0	1	1	72	1	2	2	2	3	2	24.23	1	0
37465	1.35	0.091	0.157	4.58	70.8	0.84	0.134	0.145	0.068	0.25	0.79	0.66	1	0	1	1	3	61	3	1	1	2	1	1	30.6	3	0
37478	1.23	0.311	0.196	3.57	47.6	1.27	0.061	0.179	0.015	0.3	2.99	0.66	1	0	0	0	1	66	1	1	3	1	2	1	24.02	2	0
37480	1.67	0.155	0.173	2.05	27.6	0.45	0.023	0.077	0.015	0.36	1.71	5.62	1	0	0	0	1	50	1	2	2	1	4	1	31.61	3	0
37510	4.88	0.285	0.686	9.36	103	1.56	0.081	0.106	0.071	0.14	2.62	0.97	1	0	0	0	1	73	1	1	2	1	3	1	27.62	3	0
37521	0.36	0.336	0.352	7.5	35.1	0.76	0.086	0.568	0.038	0.28	1.11	4.2	1	0	1	0	1	52	2	1	2	1	4	3	29.24	2	0
37526	1.5	0.13	0.201	3.67	41.7	0.54	0.048	0.119	0.049	0.14	1.81	5.62	1	0	0	0	2	48	1	1	1	1	3	1	27.74	2	0
37536	2.7	0.044	0.65	3.82	57.6	0.63	0.063	0.251	0.072	1.37	1.85	0.23	1	0	0	0	1	20	3	1	2	2	3	2	18.41	1	0
37540	1.11	0.243	0.494	2.97	28.4	1.62	0.023	0.056	0.032	0.32	5.11	0.39	1	0	0	0	1	70	3	2	2	2	4	1	30.36	2	0
37544	14.3	0.421	0.813	6.07	42	0.56	0.062	0.15	0.025	0.42	1.18	1.13	1	0	0	1	3	56	3	1	1	2	2	2	23.86	2	1
37557	1.19	0.163	0.396	7.54	36.5	3.05	0.158	0.267	0.211	0.2	5.36	0.97	1	0	0	0	1	31	3	1	1	2	1	1	22.51	3	0
37570	2.57	0.346	0.294	5.57	14.5	3.73	0.222	0.131	0.079	0.47	4.23	0.23	1	0	0	1	2	53	2	1	2	2	4	2	37.36	1	0
37576	3.61	0.08	0.364	5.03	27.3	0.57	0.048	0.113	0.038	0.14	0.78	4.81	1	0	0	0	1	35	1	2	1	1	1	2	28.83	3	0
37604	2	0.601	1.67	8.03	88.2	2.34	0.103	0.208	0.205	0.23	2.48	2.61	1	0	0	1	3	73	3	2	1	2	3	3	45.18	3	0
37608	0.57	0.03	0.112	2.33	9.65	0.16	0.023	0.045	0.015	0.37	1.61	0.23	1	0	0	0	3	41	1	2	1	1	5	2	31.24	3	0
37611	1.11	0.08	0.301	7.32	20.1	0.34	0.072	0.194	0.085	0.2	0.55	2.9	1	0	0	0	1	27	1	2	2	2	1	1	31.89	2	0
37616	1.64	0.202	0.078	0.823	10.5	1.43	0.083	0.033	0.015	2.01	2.24	0.23	1	0	0	0	1	52	3	1	2	1	3	3	22.59	1	1
37629	1.11	0.282	13.2	8.08	198	2.37	0.48	0.197	0.541	0.29	3.96	2.91	1	0	0	1	1	80	3	1	2	2	3	3	24.74	2	0
37646	0.24	0.289	0.114	5.32	63.9	0.49	0.043	0.178	0.131	0.14	1.79	0.69	1	0	0	1	2	66	2	1	2	2	4	2	28.21	3	0
37649	0.7	0.552	0.219	7.53	51.8	0.75	0.077	0.197	0.103	0.21	1.07	0.53	1	0	0	0	2	71	2	1	1	1	4	2	25.23	2	0
37650	0.21	0.07	0.099	1.63	5.72	0.11	0.023	0.062	0.015	0.63	1.76	0.23	1	0	0	1	3	60	3	2	1	2	3	2	27.79	2	0
37653	0.82	0.926	0.762	5.89	153	0.32	0.037	0.206	0.046	0.55	0.7	1.64	1	0	1	0	3	82	1	2	2	1	3	3	27.27	3	0
37664	0.42	0.329	0.706	7.63	87.4	3.61	0.145	0.252	0.251	0.36	3.15	0.71	1	0	0	0	1	26	3	1	1	3	1	1	30.59	3	0
37665	2.47	0.21	0.467	4.59	66.2	0.45	0.023	0.121	0.2	1.06	0.97	0.93	0	0	0	0	1	76	1	2	1	2	3	1	22.98	2	0
37667	1	0.507	0.602	1.27	76	1.18	0.092	0.176	0.298	0.91	7.23	4.25	1	1	1	1	1	65	1	1	1	1	4	2	26.25	2	0
37686	0.22	0.129	0.135	1.05	12.2	0.07	0.038	0.055	0.027	0.37	0.56	1.08	1	0	0	0	3	29	1	2	2	1	3	2	23.29	3	0
37690	13	0.302	0.369	10.1	24.6	0.31	0.023	0.239	0.043	0.54	0.4	2.19	1	0	0	1	3	58	1	2	2	2	3	3	48.48	2	0
37705	1.91	0.128	1.35	5.24	17.2	0.14	0.023	0.135	0.082	0.3	0.73	0.5	1	0	0	0	3	35	1	2	1	1	3	3	25.67	3	0
37710	1.96	0.251	0.355	13.8	137	0.64	0.102	0.5	0.124	0.33	1.14	1.54	1	0	0	0	1	43	1	2	2	1	3	1	22.17	3	0
37718	3.21	0.698	0.643	14	61.2	1.53	0.319	0.568	0.122	0.6	1.41	3.37	1	1	0	0	1	48	1	1	2	1	3	3	31.01	1	0
37727	2.27	0.204	0.233	6.94	29.2	0.73	0.042	0.247	0.041	0.36	2.07	9.58	1	0	0	1	1	65	1	1	1	1	3	2	24.14	3	0
37738	14.1	0.123	0.623	40	51.6	0.51	0.075	1.68	0.045	0.14	0.82	0.61	1	0	1	0	3	30	1	2	1	3	2	3	22.81	3	0
37739	1.35	0.104	0.469	8.45	62.4	0.22	0.035	0.202	0.135	0.14	0.39	0.23	1	0	0	0	1	28	1	2	3	2	3	1	19.12	3	0
37741	1.16	0.38	0.184	3.48	23.5	0.98	0.05	0.132	0.021	0.43	2.48	20.8	1	1	1	1	1	54	1	2	2	1	4	2	24.96	3	0
37754	0.43	0.667	0.266	11.3	50	2.35	0.056	0.198	0.036	0.32	3.21	0.96	1	0	0	1	2	82	2	1	2	2	3	3	32.41	2	0
37767	3.31	0.407	0.747	5.12	77.8	0.32	0.134	0.183	0.138	0.14	0.88	0.6	1	0	0	0	3	31	1	1	1	2	5	1	25.38	3	0
37787	3.26	0.715	0.491	6.04	57.1	0.98	0.125	0.112	0.128	0.65	1.28	0.86	1	0	0	1	1	45	2	2	2	2	4	2	37.65	3	0
37792	6.59	0.633	0.245	5.48	63.6	1.14	0.063	0.203	0.201	1.3	3.25	1.63	1	0	1	0	1	50	1	1	2	1	1	1	36.39	1	0
37803	3.35	0.792	0.685	4.25	60.5	0.44	0.132	0.368	0.115	0.71	1.08	1.1	1	0	0	0	3	68	1	2	2	1	4	3	20.74	3	0
37806	1.06	0.109	0.289	6.31	73.5	0.7	0.064	0.202	0.08	0.14	1.57	1.71	0	0	0	1	3	62	1	1	1	1	3	1	29.05	3	0
37810	0.44	0.26	0.145	4.28	20.1	0.07	0.044	0.071	0.05	0.32	0.29	2.17	1	0	0	0	1	75	3	2	1	2	3	3	24.37	3	0
37812	2.02	0.03	0.164	1.71	12.3	0.1	0.023	0.053	0.049	0.2	0.58	1.59	1	0	0	0	1	27	1	1	1	1	3	1	27.66	3	0
37817	27.8	0.286	0.92	6.77	269	1.4	0.131	0.174	0.508	0.14	0.76	0.39	1	0	0	1	2	28	1	1	1	1	3	1	24.62	3	0
37822	3.94	0.325	0.557	7.96	94	1.15	0.136	0.253	0.057	0.23	1.31	3	1	0	0	0	1	33	1	2	1	1	3	1	23.72	2	0
37840	2.94	0.435	0.515	6.08	71.4	2.32	0.167	0.176	0.049	0.14	2.54	1.84	1	0	0	0	2	25	3	1	1	3	1	3	24.84	3	0
37848	0.45	0.221	0.248	7.68	49.7	0.4	0.091	0.282	0.032	0.14	1.69	9.47	1	0	0	0	1	57	1	2	2	1	3	1	24.24	3	0
37856	5.81	0.246	0.392	4.84	69.4	1.16	0.135	0.29	0.14	1	3	1.83	1	0	0	0	1	35	2	1	1	2	3	1	27.84	1	0
37860	1.54	0.425	0.32	4.23	38.2	0.82	0.023	0.163	0.078	0.33	3.6	7.21	1	0	0	1	1	65	1	1	1	1	4	2	26.17	2	0
37861	3.01	0.165	0.588	5.17	47.8	0.44	0.061	0.109	0.117	0.14	0.63	0.66	1	0	0	0	1	26	1	2	1	1	3	2	26.75	2	0
37867	5.81	0.294	0.51	10.3	17.8	1.16	0.545	0.287	0.267	0.25	2.4	3.89	1	0	0	0	1	46	1	1	1	1	3	1	28.53	3	0
37870	1.06	1.49	0.36	12.2	96.6	1.53	0.352	0.31	0.072	0.51	1.61	1.27	1	0	0	0	1	70	3	1	1	2	3	3	27.41	2	0
37877	4.71	0.206	1.39	5.55	96.5	1.4	0.094	0.292	0.142	0.25	0.7	0.66	1	0	0	0	1	22	1	2	1	1	1	2	31.64	2	0
37881	6.7	0.322	0.319	7.79	26	1.04	0.07	0.261	0.097	0.32	1.73	2.2	0	0	0	1	1	40	3	1	1	1	3	2	33.89	1	0
37901	0.73	1.52	0.207	4.58	30	0.99	0.045	0.077	0.052	1.09	5.69	0.56	1	0	1	1	2	77	3	1	1	2	3	3	25.74	2	0
37915	0.34	0.101	0.232	5.6	34.1	0.26	0.023	0.413	0.086	0.25	1.2	10.2	1	0	0	1	1	47	1	1	1	2	4	2	31.53	3	0
37922	3.47	0.282	0.327	6.28	64.2	1.03	0.056	0.105	0.066	0.25	2.5	3.42	1	0	0	0	1	85	3	2	1	2	3	3	27.53	2	0
37930	0.91	1.32	0.409	3.07	35.9	0.46	0.074	0.215	0.063	4.08	1.72	3.59	1	0	0	1	1	48	3	1	2	2	4	3	23.82	1	0
37936	1.71	0.574	0.298	7.09	33.2	1.01	0.047	0.266	0.036	1.48	2.48	0.33	1	0	0	1	1	44	2	1	1	1	3	3	28.47	1	0
37942	1.5	0.312	1.35	9.04	57.3	0.33	0.084	0.262	0.052	0.2	0.33	1.02	1	0	0	0	1	27	1	2	1	1	3	3	25.57	3	0
37947	4.98	0.273	0.592	8.78	59.2	0.6	0.174	0.285	0.181	0.14	0.53	0.23	1	0	1	1	2	44	1	1	1	3	3	2	36.46	3	0
37952	0.61	0.045	0.258	1.68	19.9	0.07	0.023	0.058	0.015	0.29	0.49	0.23	1	0	0	0	1	22	2	2	2	1	3	1	27.17	2	0
37953	1.44	0.229	0.412	4.86	81.8	0.93	0.08	0.296	0.16	0.14	1.49	0.76	1	0	0	0	1	48	2	1	1	1	3	2	23.02	1	0
37957	2.32	0.706	0.558	5.18	34.4	0.9	0.083	0.162	0.099	1.48	1.28	0.6	1	0	0	1	3	49	1	2	2	1	4	2	44.13	1	0
37961	2.27	1.07	0.962	6.4	151	2.72	0.145	0.169	0.081	0.53	1.53	0.23	1	0	0	0	3	45	3	1	3	3	1	3	30.32	1	0
37967	0.18	0.235	0.147	2.62	29.4	0.81	0.061	0.102	0.089	0.24	1.47	0.77	0	0	0	1	3	68	1	2	2	2	4	2	41.41	3	0
37969	1.19	0.065	0.156	2.72	57	0.27	0.023	0.098	0.046	0.14	1.35	1.92	1	0	0	0	1	26	1	1	3	3	3	1	25.7	1	0
37973	4.87	0.177	0.705	6.68	44.6	0.42	0.154	0.169	0.232	0.22	0.59	1.39	1	0	0	1	1	30	1	2	2	1	1	1	18.86	3	0
37982	4.28	0.26	1.89	5.31	116	0.34	0.023	0.206	0.173	0.45	0.58	0.45	1	0	0	0	3	23	1	2	1	1	3	1	21.32	3	0
37991	0.34	0.03	0.029	0.575	16.1	0.07	0.033	0.021	0.015	0.26	0.6	0.96	1	0	0	1	1	24	2	1	1	2	1	1	25.28	2	0
37996	2.85	3.66	0.766	9.84	98.5	2.83	0.086	0.387	0.337	1.35	1.46	1.27	1	0	0	1	1	45	2	2	1	1	3	1	25.68	1	0
38000	1.17	1.29	0.291	3.13	33.2	0.75	0.24	0.081	0.085	0.51	1.38	0.33	1	1	0	1	3	85	3	1	1	3	4	3	21.41	2	0
38033	3.57	0.326	1.07	5.89	288	0.57	0.097	0.154	0.652	0.31	0.51	0.23	1	0	0	0	3	28	1	2	1	1	3	3	25.9	3	0
38038	0.98	0.283	0.212	3.85	59.8	0.4	0.11	0.186	0.061	0.14	1.22	0.82	1	0	0	1	1	34	3	1	2	2	4	1	27.87	3	0
38042	1.19	0.374	0.201	1.81	53.2	0.44	0.042	0.044	0.046	0.85	1.23	0.23	1	0	0	0	1	63	1	2	2	2	4	2	25.36	2	0
38045	1.13	0.304	0.436	6.63	32.6	0.83	0.023	0.182	0.028	0.94	2.17	0.7	1	0	0	0	2	40	1	1	3	1	3	2	26.27	1	0
38050	1.07	0.369	0.384	6.72	38.1	0.38	0.04	0.137	0.027	0.5	1.06	0.49	1	0	0	1	3	85	3	2	2	2	1	3	27.66	3	0
38055	1.61	0.387	0.37	7.62	15.2	1.21	0.061	0.122	0.069	0.86	3.37	3.06	1	0	0	1	1	55	3	1	1	1	3	1	33.05	1	0
38056	0.59	0.054	0.156	2.37	49.1	0.39	0.033	0.082	0.015	0.14	1.69	2.36	1	0	0	0	1	29	1	2	1	1	3	1	20.81	3	0
38062	0.51	0.06	0.18	3.31	36.3	0.2	0.057	0.119	0.032	0.14	0.61	0.94	1	0	0	0	1	26	2	1	2	2	1	1	24.94	3	0
38079	6.24	0.367	0.807	31.4	78.6	0.95	0.044	0.185	0.054	0.24	0.98	1.56	1	0	0	0	1	40	1	2	1	1	3	1	21.59	3	0
38087	2.03	0.03	0.527	5.01	113	0.41	0.187	0.138	0.209	0.14	0.99	0.64	1	0	0	0	1	23	1	1	3	2	3	2	31.16	3	0
38098	1.78	0.835	0.318	19.4	113	1.21	0.038	0.632	0.037	0.31	2.34	0.62	1	0	1	0	1	67	1	2	2	2	2	1	25.22	2	0
38100	2.3	0.347	0.403	5.82	21	0.97	0.023	0.214	0.041	1.58	2.8	1.61	1	1	1	1	3	65	1	2	2	2	2	3	34.5	1	0
38113	1.21	0.385	0.418	3.73	35.6	2.09	0.06	0.315	0.041	0.69	1.81	0.23	1	0	0	0	1	29	3	1	1	2	1	3	31.42	1	0
38118	2.15	0.948	3.22	7.14	82.1	1.11	0.077	0.394	5.599	1.32	1.82	0.75	1	1	0	1	1	46	1	2	1	2	4	1	20.59	3	0
38128	12	0.243	0.758	4.92	127	0.36	0.288	0.191	0.172	0.4	0.73	0.23	1	0	0	0	1	30	1	1	3	1	3	1	32.52	1	0
38134	1.36	0.923	0.877	10.2	174	1.06	0.056	0.526	0.206	3.82	1.48	1.69	1	0	0	0	1	33	1	1	2	2	3	2	23.62	1	0
38154	2.39	0.82	0.643	12.2	83.7	1.66	0.049	0.346	0.646	0.43	3.41	0.79	1	0	0	1	2	66	2	1	1	1	3	3	35.22	2	1
38166	0.35	0.233	0.09	1.32	18.8	0.23	0.033	0.068	0.063	0.26	1.58	0.83	0	1	1	0	3	62	1	2	2	1	3	1	25.53	3	0
38175	1.54	0.453	0.185	4.34	15.7	1.05	0.034	0.297	0.015	0.37	2.48	3.77	1	0	0	1	3	74	1	2	2	1	4	2	38.76	3	0
38181	1.29	0.206	0.271	2.98	45.4	0.92	0.067	0.084	0.073	0.14	2.7	1.73	1	0	0	0	1	25	3	1	1	1	1	1	24.03	3	1
38182	1.14	0.528	0.434	7.32	55.6	1.36	0.225	0.2	0.024	0.25	2.54	0.72	1	0	0	0	1	56	3	1	2	2	4	3	28.35	2	0
38188	1.74	0.71	1.2	9.52	68.6	0.67	0.356	0.363	0.473	0.29	0.53	0.23	1	0	0	0	1	24	1	2	2	1	3	1	26.72	2	0
38207	1.71	0.912	0.356	9.7	102	1.68	0.453	0.191	0.112	0.67	2.21	0.23	1	0	0	1	3	60	3	1	2	1	4	3	25.58	2	0
38216	2.35	0.578	1.67	9.34	90.7	1.21	0.079	0.294	0.051	0.22	1.4	0.71	1	0	0	1	1	40	1	2	1	3	1	1	35.13	1	0
38219	2.12	0.57	1.21	7.38	58.5	0.78	0.202	0.473	0.791	0.22	1.5	4.24	1	0	0	0	1	40	3	2	1	2	4	2	40.26	2	0
38220	0.34	0.18	0.121	2.17	12.2	0.42	0.023	0.084	0.015	0.3	2.39	0.36	1	0	1	1	1	67	1	2	1	1	3	1	27.15	2	0
38222	14.2	0.215	1.42	12.4	25.8	1.19	0.662	0.199	0.342	0.93	0.76	0.44	1	0	0	0	1	23	2	1	3	2	3	1	23.86	1	0
38245	0.91	0.104	0.168	3.89	31.4	0.24	0.036	0.123	0.083	0.94	0.53	0.23	1	0	0	0	1	21	2	2	1	2	3	3	31.62	1	0
38249	5.19	0.183	0.323	5.76	105	0.53	0.153	0.168	0.211	0.76	0.57	0.39	1	0	0	0	1	21	2	2	3	3	1	3	27.22	1	0
38251	6.4	0.326	0.699	5	182	1.15	0.47	0.144	0.135	0.53	2.2	0.34	1	0	0	0	3	58	1	1	1	1	3	1	25.38	2	0
38260	1.35	2.24	0.513	19.4	36.6	1.74	0.212	0.308	0.052	0.39	1.9	3.23	1	0	0	0	1	69	1	1	1	1	3	2	28.05	2	0
38261	2.88	0.222	0.406	5.9	52.5	0.44	0.067	0.219	0.054	0.27	0.85	0.53	1	0	0	0	3	32	1	2	1	2	4	3	26.15	3	0
38271	0.6	0.118	0.161	2.76	17.1	0.21	0.023	0.078	0.155	0.2	0.76	1.07	1	0	0	1	1	31	1	2	3	1	3	1	24.15	3	0
38280	0.57	1.5	0.35	8.66	60.7	1.05	0.102	0.176	0.085	2.76	2.39	1.37	1	0	0	1	1	54	2	1	2	1	3	2	19.59	1	0
38290	4.59	1.45	0.986	4.62	21	1.77	0.1	0.05	0.066	0.51	4.95	0.23	1	1	0	0	1	73	1	1	1	1	3	1	28.95	2	0
38302	2.63	0.157	0.453	6.86	40.3	0.68	0.083	0.303	0.076	0.14	0.67	0.53	1	0	0	0	3	32	3	2	2	3	4	3	29.4	3	0
38336	2.92	0.063	0.416	2.14	35.8	0.27	0.067	0.068	0.059	0.14	0.45	0.23	1	0	0	1	1	25	2	1	3	1	3	1	49.52	3	0
38342	3.19	0.109	0.858	5.62	96.3	0.4	0.07	0.209	0.117	0.14	0.66	0.7	1	0	0	0	1	42	1	2	1	1	3	1	24.04	3	0
38348	0.51	0.678	0.186	5.3	38.8	0.51	0.023	0.135	0.015	0.44	1.32	6.32	1	0	1	0	3	56	1	2	2	1	4	2	21.78	3	0
38364	0.71	0.086	0.146	2.3	26.6	0.28	0.193	0.04	0.237	0.14	0.42	0.23	0	0	1	1	3	63	3	2	1	2	3	3	37.55	3	1
38368	4.45	0.589	0.157	6.25	37	0.49	0.098	0.102	0.047	0.26	1.07	1.75	1	0	0	1	3	60	1	2	1	1	3	2	29.86	2	0
38377	5.21	0.525	0.489	12.4	98.8	0.51	0.086	0.556	0.101	0.23	0.53	6.88	1	0	0	0	1	43	1	2	1	1	3	1	35.3	2	0
38393	2.27	0.091	0.401	6.56	10.9	0.54	0.098	0.115	0.015	0.23	0.78	1.96	1	0	1	1	1	51	1	2	1	1	3	3	38.07	3	0
38394	5.5	0.491	0.475	5.27	67.5	1.12	0.137	0.294	0.141	0.32	1.97	0.78	1	0	0	0	1	47	1	1	3	1	3	2	29.91	2	0
38396	2.93	0.238	0.501	10.8	124	0.46	0.117	0.56	0.062	0.21	0.89	0.94	0	0	0	0	3	24	1	1	2	3	3	1	24.9	3	0
38406	1.85	0.461	0.428	6.48	47.2	0.95	0.208	0.216	0.025	0.57	1.78	0.23	1	0	0	0	3	49	2	2	1	1	1	3	36.21	2	0
38422	1.47	0.601	0.389	5.82	51.3	1.64	0.334	0.274	0.133	0.21	3.54	2.64	1	0	0	0	1	27	2	1	1	3	1	3	29.74	3	0
38426	8.84	0.294	0.703	5.96	35	3.07	0.171	0.192	0.086	0.14	4.4	5.7	1	0	0	1	2	53	1	1	1	1	3	2	40.48	3	0
38432	2.04	0.669	0.523	6.85	71.8	0.45	0.049	0.219	0.09	0.37	1.33	0.67	1	0	0	1	3	69	2	2	2	2	4	2	27.65	3	0
38443	0.65	1.02	0.367	11.9	141	0.62	0.056	0.763	0.245	0.21	0.94	0.9	1	0	1	1	3	40	1	2	2	3	4	1	51.3	2	0
38464	0.79	0.384	0.263	4.22	127	0.3	0.059	0.966	0.133	1.49	1.04	2.11	1	0	0	1	1	37	1	2	1	2	4	1	54.78	1	0
38467	0.99	0.234	0.345	5.2	95	1.6	0.089	0.497	0.173	1.59	2.52	2.69	1	0	0	0	1	35	1	2	1	2	4	2	28.57	1	0
38469	0.47	0.252	0.117	2.44	7.22	1.7	0.125	0.101	0.045	1.37	4.79	0.66	1	0	1	0	1	58	1	1	1	1	3	3	31.75	2	0
38475	5.38	0.113	0.904	2.69	39.8	0.26	0.023	0.101	0.086	0.2	0.72	2.69	1	0	0	0	1	36	1	2	1	1	3	2	24.37	3	0
38477	0.38	0.17	0.421	2.77	84	0.35	0.032	0.122	0.073	0.5	1.17	0.75	1	0	0	0	3	31	1	2	1	1	2	2	27.27	3	0
38508	0.93	0.702	0.463	11.6	75.8	1	0.036	0.27	0.015	1.06	2.64	0.23	1	0	0	0	2	54	2	1	3	3	3	3	26.18	1	0
38509	0.51	0.435	0.566	4.21	85.2	0.94	0.045	0.148	0.069	0.79	3.64	2.25	1	0	0	0	2	67	1	1	2	1	3	1	26.59	3	0
38514	4.02	0.981	1.35	15.9	107	0.74	0.037	0.499	0.118	0.44	1.06	1.14	1	0	0	1	1	46	1	2	2	1	3	2	51.27	3	0
38518	1.46	0.27	0.341	4.25	44	0.91	0.07	0.243	0.112	0.51	1.93	1.69	1	0	0	0	1	23	1	1	2	1	3	1	50.94	1	0
38534	2.39	0.082	1.21	2.69	54.1	1	0.156	0.072	0.148	0.2	0.79	0.39	1	0	0	0	1	22	3	2	2	2	4	3	35.3	3	0
38536	0.6	0.068	0.139	3.51	24.4	0.22	0.048	0.075	0.038	0.14	0.65	0.78	1	0	0	0	2	45	1	1	2	1	3	1	34.57	3	0
38552	3.66	0.238	0.677	7.84	347	1.32	0.195	0.113	2.183	0.14	1.26	1.02	1	0	0	0	1	22	3	2	2	3	1	2	27.7	3	0
38553	1.18	0.134	0.278	5.85	123	0.67	0.085	0.41	0.229	2.29	0.88	2.57	1	0	0	0	1	25	2	2	1	1	3	1	33.64	1	0
38558	2.03	0.086	0.332	2.75	26.8	0.55	0.043	0.116	0.052	0.14	1.69	1.03	1	0	0	0	1	45	1	1	1	1	3	1	23.21	3	0
38559	1.12	0.559	0.333	11.6	223	1.07	0.055	0.129	0.16	0.32	1.3	0.74	1	0	0	1	1	67	1	2	2	1	3	2	57.31	3	0
38560	1.94	0.19	0.461	6.28	174	0.72	0.13	0.119	0.18	0.14	0.91	0.23	1	0	0	0	1	20	2	2	2	1	3	1	27.58	3	0
38562	2.39	1.68	3.32	4.72	35.2	0.87	0.22	0.104	0.183	0.37	2.92	0.87	0	1	0	1	1	81	2	1	1	2	3	2	29.44	2	0
38568	0.68	0.329	0.248	4.62	34.2	0.31	0.023	0.102	0.051	0.31	0.84	1.05	1	0	1	1	3	67	3	2	1	2	3	3	40.54	3	0
38575	12.8	1.11	2.98	9.6	47.1	2.35	0.074	0.181	0.08	0.49	2.54	0.92	1	1	0	0	3	66	1	1	1	2	3	1	32.76	1	0
38577	0.78	0.345	0.438	3.26	28.1	1.13	0.068	0.069	0.055	0.49	3.13	0.23	0	1	0	1	3	81	1	2	2	2	3	2	31.88	3	0
38578	1.94	0.312	0.442	9.17	132	0.54	0.065	0.778	0.101	0.24	0.76	0.86	1	0	0	0	1	46	1	2	1	2	3	2	30.52	3	0
38585	1.17	0.098	0.289	7.43	41.3	0.42	0.041	0.233	0.034	0.14	0.79	0.87	1	0	0	0	1	33	1	2	1	1	3	2	31.77	2	0
38608	0.21	0.345	0.098	3.88	48.1	0.74	0.045	0.211	0.107	0.45	3.46	1.58	0	0	1	1	3	74	3	2	1	2	4	1	23.12	3	0
38614	0.44	0.107	0.029	0.538	7.77	0.12	0.023	0.016	0.025	1.4	2.83	1.63	1	0	0	1	1	58	1	1	2	2	3	3	29.83	1	0
38637	1.35	0.443	0.198	3.81	26	0.52	0.023	0.601	0.095	0.57	1.56	3.46	1	0	0	1	2	69	1	1	1	1	5	1	29.78	2	0
38642	3.04	0.068	0.501	7.8	171	0.74	0.276	0.3	0.413	0.25	0.67	0.23	1	0	0	0	1	20	1	1	2	1	3	1	21.88	1	0
38664	2.53	0.308	0.699	7.72	105	0.65	0.095	0.424	0.141	0.29	0.97	1.52	1	0	0	0	1	40	3	1	1	2	1	3	29.24	3	0
38677	1.32	0.03	0.241	0.944	8.23	0.33	0.023	0.033	0.037	2.73	0.64	1.44	1	0	0	0	1	22	2	2	1	2	3	1	22.19	1	0
38678	0.66	0.188	0.169	4.15	45.7	0.3	0.032	0.102	0.032	0.44	1.66	2.46	1	0	0	1	1	68	2	2	1	2	3	3	25.63	3	0
38681	2.32	0.86	0.399	7.98	54.2	5.19	0.12	0.118	0.069	1.54	6.5	1.65	1	0	0	0	1	41	2	1	1	1	3	3	20.69	1	0
38687	1.18	0.171	0.225	5.85	182	1.35	0.161	0.258	0.147	0.14	1.68	0.66	1	0	0	0	1	20	3	1	1	2	4	3	20.68	3	1
38689	3.92	2.69	0.854	8.26	291	1.28	0.356	0.161	0.857	3.6	2.07	1.63	1	1	1	1	1	62	3	1	2	3	4	3	30.05	1	1
38702	1.49	0.067	0.324	5.63	49.6	0.64	0.691	0.161	0.286	0.14	1.46	0.49	1	0	0	0	1	54	3	2	2	2	1	3	26.71	3	1
38705	1.12	0.582	0.398	7.88	76.6	1.14	0.16	0.265	2.465	0.42	0.69	0.59	1	0	0	0	1	39	2	2	1	1	1	3	25.41	1	0
38732	0.85	2.44	0.466	6.5	86	2.65	0.105	0.355	0.135	0.78	3.56	2.98	1	0	1	1	1	64	3	2	2	3	4	3	41.96	2	0
38764	0.71	0.185	0.114	3.57	9.16	0.3	0.042	0.072	0.023	0.4	1.74	3.83	1	0	0	0	1	59	2	2	1	1	3	2	26.71	2	0
38771	1.68	0.165	0.36	3.78	34.7	0.1	0.069	0.135	0.082	0.14	0.67	2.98	1	0	0	0	1	42	1	2	3	1	3	3	21.42	3	0
38796	0.72	0.221	0.237	3.64	61.7	0.62	0.037	0.054	0.211	0.43	2.71	0.62	0	1	0	1	1	85	2	2	2	2	3	3	35.68	3	0
38803	1.86	0.555	0.532	2.87	39.1	2.22	0.079	0.107	0.088	2.65	3.48	2.53	1	0	0	0	1	47	1	1	1	3	4	1	31	1	0
38817	2.08	0.08	0.33	5.48	25.8	3.03	0.107	0.269	0.168	0.34	4.24	0.73	1	0	0	0	1	25	3	1	2	2	4	1	24.28	1	0
38819	1	1.76	1.09	13.2	54.7	1.45	0.183	0.164	0.173	1.51	1.61	1.88	1	0	0	0	1	52	2	2	1	1	3	3	23.61	1	0
38821	0.17	0.03	0.029	0.906	10.1	0.07	0.023	0.038	0.015	0.14	0.5	1.03	1	0	0	0	1	29	2	2	1	2	3	2	36.19	3	0
38830	0.24	0.03	0.062	0.694	31.8	0.15	0.023	0.022	0.015	0.14	1.73	0.47	1	0	0	0	1	42	3	1	1	2	1	3	23.5	3	0
38831	3.08	0.03	0.241	2.29	25.9	0.27	0.051	0.047	0.113	0.73	1.33	0.23	1	0	0	0	1	24	2	1	1	1	3	2	21.83	1	0
38838	0.21	0.545	0.104	1.04	15.4	0.31	0.065	0.042	0.015	2.21	2.53	2.32	1	1	0	1	2	63	2	2	1	2	3	2	26.15	1	0
38850	3.35	1.49	0.307	3.38	38.2	0.41	0.043	0.139	2.822	1.04	1.75	1.96	1	0	0	0	1	61	1	2	3	1	5	1	24.24	2	0
38852	1.3	0.063	0.167	2.01	16.5	0.17	0.023	0.071	0.03	0.14	0.68	2.15	1	0	0	0	2	28	2	2	1	1	3	1	32.35	2	0
38853	0.16	0.048	0.061	2.76	7.92	0.11	0.023	0.049	0.015	0.32	1.12	0.67	1	0	0	0	2	60	1	1	1	1	3	2	27.59	2	0
38854	0.38	0.487	0.342	6.31	192	1.28	0.08	0.271	0.166	0.27	2.38	0.95	1	0	0	0	1	64	3	1	2	2	1	1	28.75	2	1
38856	0.92	0.051	0.305	2.1	9.95	0.33	0.097	0.063	0.05	0.27	0.7	0.77	1	0	1	0	1	29	3	1	2	2	1	3	25.12	1	0
38857	1.68	0.434	1.44	3.96	79.8	0.52	0.078	0.294	0.073	0.85	1.02	1.41	1	0	0	0	1	24	1	2	3	1	3	2	26.08	2	0
38859	6.67	1.52	1.89	39.9	349	6.34	0.179	0.496	4.143	0.25	4.04	4.02	1	0	0	0	1	44	3	1	2	2	3	2	34.58	3	0
38860	1.26	0.808	0.436	10.5	133	0.9	0.097	0.389	0.078	0.48	0.92	3.65	1	0	0	1	1	54	3	2	1	1	3	3	26.19	3	0
38861	0.47	0.271	0.521	6.82	47	0.78	0.066	0.291	0.102	0.29	1.33	0.93	1	0	1	1	3	73	3	1	2	1	3	2	37.67	2	0
38901	3.71	1.65	0.499	13.8	42.1	2.97	0.087	0.424	0.084	0.38	2.79	3.51	1	0	0	1	1	53	1	1	1	1	3	1	27.74	2	0
38905	1.56	0.489	0.646	16.6	62.7	0.57	0.095	0.364	0.134	0.23	0.55	1.25	1	0	0	1	1	38	1	2	1	1	4	2	24.32	3	0
38910	0.79	0.354	0.123	1.9	20.8	0.4	0.068	0.091	0.015	0.94	1.98	1.56	1	1	0	1	2	56	1	1	1	2	5	3	36.47	1	1
38914	3.88	0.221	0.789	4.92	58.6	0.34	0.289	0.164	0.04	0.28	0.56	0.51	1	0	0	0	1	41	1	2	1	1	3	2	31.8	3	0
38931	0.9	0.043	0.637	2.88	38.7	0.67	0.066	0.085	0.083	0.14	0.79	0.49	1	0	0	0	3	25	3	2	1	3	1	3	25.65	3	0
38934	0.44	0.03	0.155	0.947	6.72	0.12	0.023	0.026	0.015	0.4	1.32	1.84	1	0	0	0	3	33	1	2	1	1	3	1	19.17	3	0
38936	0.72	0.155	0.16	2.33	32.6	0.2	0.023	0.124	0.03	0.79	1.58	0.42	1	0	0	0	1	62	1	1	1	1	3	2	24.89	1	0
38941	0.91	0.853	0.373	25	121	2.24	0.246	0.664	0.108	0.65	1.84	0.74	1	0	0	0	1	37	2	1	1	2	4	3	24.73	3	0
38948	5.38	0.083	0.721	8.09	70.2	0.28	0.05	0.283	0.162	0.14	0.18	0.41	1	0	0	0	2	22	1	2	1	1	3	2	30.9	3	0
38958	0.15	0.147	0.176	3.34	46	0.62	0.041	0.107	0.028	0.29	1.94	0.66	1	0	1	1	3	69	1	2	2	1	4	3	55.12	2	0
38961	1.02	0.842	0.48	3.88	24.8	0.61	0.052	0.22	0.056	0.5	0.93	3.55	1	0	0	1	3	47	1	2	2	2	4	2	38.78	3	0
38965	1.36	0.112	0.265	8.09	14.2	0.88	0.101	0.181	0.087	0.75	1.2	0.23	1	0	0	0	1	27	1	2	1	2	4	3	56.76	1	1
38967	1.65	0.158	2.68	4.66	68.3	0.84	0.068	0.151	0.147	0.26	0.29	0.23	1	0	0	0	3	30	2	2	1	2	3	1	33.85	3	0
38969	0.97	0.306	0.128	2.96	13.9	0.54	0.023	0.049	0.015	1.37	2.07	1.58	0	0	0	0	2	77	3	2	2	2	3	3	26	1	0
38970	0.35	0.549	0.285	3.09	11.3	1.62	0.054	0.077	0.045	0.81	9.6	1.14	1	1	1	0	1	82	3	1	2	3	4	3	16.97	1	1
38974	2.16	0.152	0.305	3.07	37.2	1.12	0.106	0.119	0.149	0.2	2.2	0.96	0	0	0	1	3	55	1	1	1	1	4	2	38.62	2	0
38977	1.8	0.146	0.245	2.2	42.2	0.23	0.107	0.3	0.118	0.14	0.6	0.87	1	0	0	0	3	28	1	2	2	2	4	1	30.84	3	0
38980	0.67	0.273	0.266	6.99	33.2	1.32	0.126	0.179	0.376	0.14	3.3	1.62	1	0	0	1	2	64	1	1	1	1	3	2	28.26	3	0
38983	0.63	0.405	0.562	9.96	71.6	1.09	0.143	0.368	0.157	0.64	1.1	0.23	1	0	0	0	1	23	3	1	2	2	4	3	26.84	2	0
38987	0.19	0.178	0.204	6.93	62.2	0.41	0.5	0.39	0.05	0.14	0.73	1.47	1	0	1	1	1	61	1	1	2	1	1	3	34.74	3	0
39004	7.03	0.622	0.53	7.21	155	0.87	0.576	0.373	0.186	0.77	1.05	0.81	1	0	0	0	1	23	1	1	3	1	3	1	23.21	1	0
39018	4.08	0.183	0.367	19.4	40.1	0.84	0.132	0.465	0.05	0.14	1.58	1.11	1	0	0	0	2	35	2	1	1	2	3	2	31.92	3	0
39022	3.44	0.391	0.353	9	42	1.27	0.317	0.166	0.056	0.21	1.71	1.28	0	0	0	0	2	55	1	1	3	1	4	3	25.46	2	0
39035	1.12	0.154	0.802	4.43	54.2	0.28	0.09	0.38	0.024	0.27	0.43	1.56	1	0	0	0	3	47	1	2	1	1	4	3	29.8	3	0
39054	0.3	1.07	0.602	12.6	29.5	0.74	0.057	0.108	0.015	0.88	1.93	0.95	1	0	0	0	2	50	2	2	2	3	3	3	26.11	1	1
39060	0.56	0.16	0.167	2.04	9.06	0.4	0.023	0.034	0.015	0.85	4.66	0.56	1	0	0	1	1	75	3	2	1	2	3	3	17.4	1	0
39064	0.51	0.121	0.283	2.58	9.51	0.21	0.023	0.09	0.015	0.44	1.56	1.42	1	1	1	1	1	81	1	1	2	2	3	2	28.93	2	0
39065	4.07	0.239	0.225	5.25	23.2	0.38	0.052	0.086	0.075	0.25	1.98	5.2	1	0	1	1	1	55	1	2	1	1	3	2	44.77	2	0
39077	1.75	0.151	0.243	3.22	8.21	0.63	0.091	0.19	0.058	0.26	1.75	1.47	0	0	0	0	1	75	1	1	2	2	3	1	25.8	3	0
39080	1.63	1.1	2.56	7.11	50.2	1.3	0.023	0.235	0.18	0.6	2.42	0.23	1	0	0	0	3	70	1	2	3	3	3	2	35.78	2	0
39086	1.63	0.791	0.188	3.54	45.3	0.77	0.125	0.175	0.063	0.29	1.6	4.35	1	0	1	1	1	62	3	1	1	1	4	3	38.23	3	0
39092	1.43	0.108	0.43	16.9	56	1.11	0.158	0.408	0.224	0.14	1.41	1.17	1	0	0	0	2	50	1	1	1	1	3	1	24.63	3	0
39098	1.15	0.279	0.599	6.2	101	0.93	0.081	0.197	0.229	0.22	1	0.46	1	1	1	0	3	72	3	1	1	3	3	3	22.59	2	0
39099	0.08	0.065	0.043	0.899	7.55	0.1	0.023	0.016	0.015	0.31	1.18	0.64	1	0	0	1	3	53	2	2	2	2	4	3	22.85	3	1
39116	0.67	0.365	0.211	5.1	44.9	0.57	0.075	0.101	0.091	0.42	1.21	1.2	1	0	1	1	3	60	1	1	1	1	4	2	32.15	3	0
39124	0.08	0.147	0.101	1.47	18.1	0.18	0.023	0.039	0.045	0.37	0.81	4.64	1	0	0	0	1	58	1	2	1	1	3	1	24.94	3	0
39136	2.53	0.277	0.485	7.29	68.2	0.9	0.078	0.256	0.096	0.14	1.03	1.45	1	0	0	0	1	36	2	2	1	2	1	3	27.27	3	0
39154	0.38	0.03	0.029	0.534	3.87	0.07	0.023	0.017	0.015	1.84	1.89	2.56	1	1	0	1	2	50	1	2	2	3	1	2	24.94	1	0
39161	1.78	0.174	0.749	7.84	81.4	0.67	0.045	0.509	0.099	0.35	0.92	1.62	1	0	0	1	1	56	1	2	1	1	3	2	38.83	2	0
39175	21	0.921	2.12	9.19	41.6	2.19	0.169	0.618	0.132	0.51	3.08	1.07	1	0	1	1	2	83	1	1	1	2	3	2	29.03	2	0
39178	3.19	0.36	0.378	6.66	37.5	0.99	0.3	0.127	0.039	0.14	2.74	0.23	1	0	0	0	1	30	2	1	2	1	3	1	24.9	1	0
39181	4.85	0.567	0.57	4.73	28.8	0.75	0.534	0.35	0.404	0.78	3.35	1.59	0	1	0	1	1	81	2	2	2	2	3	3	21.47	2	0
39190	2.39	0.305	0.195	3.54	44.2	1.02	0.656	0.116	0.036	0.66	4.35	2.57	1	1	0	0	2	85	1	1	1	1	3	2	17.34	2	0
39203	2.97	0.71	0.239	6.97	27.4	3.95	0.091	0.145	0.087	0.28	4.56	1.1	1	0	0	1	1	80	2	1	1	2	3	2	28.79	2	0
39204	0.33	0.226	0.226	3.15	14	0.2	0.023	0.053	0.015	0.82	0.8	0.7	1	0	0	0	1	42	1	2	1	1	3	3	36.59	1	0
39220	8.22	0.8	0.87	16.5	161	2.24	0.157	0.739	0.223	0.14	1.32	1.04	1	0	0	0	3	61	1	2	2	1	4	2	24.33	3	0
39232	1.27	0.458	0.263	4.66	55.6	0.94	0.112	0.096	0.037	0.26	1.73	1.63	1	0	0	0	2	77	1	1	2	2	4	1	26.26	2	0
39241	8.26	0.303	0.575	7.59	24.5	0.84	0.041	0.307	0.015	0.44	1.32	0.64	1	1	0	0	3	78	1	1	1	3	3	2	24.23	3	0
39246	7.49	0.299	0.357	3.62	134	0.38	0.051	0.067	0.139	0.36	1.18	0.88	1	1	0	1	1	85	3	2	2	1	3	3	32.65	3	0
39248	1.93	0.532	0.645	5.11	80.2	1.17	0.167	0.204	1.052	0.45	1.87	0.97	1	0	0	0	2	60	1	1	1	1	3	1	25.2	3	0
39249	0.22	0.03	0.089	0.786	16.5	2.07	0.033	0.028	0.015	0.43	1.03	5.01	1	0	0	0	3	58	1	1	1	1	3	2	30	2	0
39251	2.03	0.143	0.166	4.07	26.5	0.66	0.042	0.079	0.044	0.14	1.88	3.44	1	0	0	1	1	67	1	2	1	1	3	2	21.99	2	0
39281	1.81	0.249	0.46	3.8	39.9	0.35	0.098	0.167	0.317	0.25	0.59	0.99	1	0	0	0	1	50	1	2	1	1	3	2	22.71	3	0
39285	0.14	0.101	0.188	2.33	23.2	0.31	0.046	0.05	0.148	0.14	1.17	0.7	1	0	1	1	1	44	1	2	1	1	3	2	39.03	2	0
39302	3.97	1.3	0.658	7.09	65.6	3.34	0.316	0.241	0.218	0.41	2.85	0.76	1	0	0	0	3	40	1	2	2	2	4	1	35.45	3	0
39307	1.51	0.431	0.826	9.82	52.1	2.19	0.045	0.184	0.069	0.43	5.09	0.75	1	1	0	0	2	81	1	1	1	2	3	2	21.92	2	0
39311	1.23	0.335	0.347	12.4	66.6	1.39	0.051	0.44	0.038	0.27	2.33	1.03	1	0	0	0	1	35	1	1	1	1	2	3	33.37	3	0
39322	0.58	0.164	0.12	0.999	40.6	0.56	0.194	0.051	0.033	0.41	3.88	3.86	1	0	0	0	1	41	3	1	3	3	1	3	29.64	1	0
39323	0.27	0.064	0.102	6.05	13	0.36	0.033	0.12	0.032	0.14	2.3	6.68	1	0	0	1	1	63	1	1	1	1	3	2	29.34	3	0
39344	0.65	0.078	0.138	1.19	9.46	0.44	0.04	0.034	0.015	0.45	3.4	0.23	1	0	0	0	1	56	1	1	2	3	4	1	22.67	2	0
39346	0.92	0.256	0.471	8.43	133	7.17	0.088	0.173	0.105	0.24	12.3	1.37	1	0	0	0	1	33	3	1	1	3	1	3	25.58	1	0
39363	0.21	0.735	0.438	3.55	40.3	0.51	0.06	0.176	0.047	1.18	1.16	0.46	1	0	1	1	1	50	2	2	1	2	4	3	47.07	1	0
39390	0.4	0.383	0.352	4.73	37.4	0.41	0.069	0.116	0.133	0.47	0.8	1.13	1	0	0	1	1	37	1	2	2	3	4	1	27.78	3	0
39391	3.49	0.167	0.4	5.49	63	0.75	0.066	0.227	0.217	0.14	0.69	0.23	1	0	0	0	3	39	1	2	1	1	3	2	19.4	2	0
39400	0.15	0.102	0.335	2.04	21.7	0.81	0.036	0.089	0.071	0.4	5.8	0.9	1	0	0	1	1	67	1	2	2	1	3	3	26.51	3	0
39413	0.42	0.091	0.095	1.33	52.2	0.28	0.048	0.038	0.041	0.3	0.76	1.71	1	0	0	1	3	53	2	2	2	2	3	1	36.93	3	0
39419	2.87	0.384	0.464	6.23	125	0.95	0.254	0.377	0.31	0.54	0.9	0.62	1	0	0	0	2	24	1	1	2	2	4	1	28.44	1	0
39422	0.87	0.061	0.302	4.1	18	0.41	0.036	0.099	0.015	0.24	1.94	0.58	1	0	1	0	3	51	3	1	1	1	3	1	30.41	3	0
39436	1.02	1.29	0.36	11.1	27.4	1.76	0.08	0.31	0.143	0.85	2.9	1.04	1	0	0	0	2	48	1	1	1	1	4	1	22.44	1	0
39446	0.39	0.03	0.182	1.78	8.68	0.18	0.023	0.125	0.015	0.32	0.79	0.54	1	0	0	0	1	43	1	2	1	2	3	2	23.94	3	0
39448	3.75	1.4	0.478	7.4	63	1.26	0.582	0.555	0.084	0.77	2.05	9.51	1	0	0	0	3	60	1	2	1	2	5	3	19.76	3	0
39452	0.47	0.063	0.029	0.991	9.95	0.12	0.048	0.055	0.015	2.02	1.94	2.68	1	0	0	1	1	36	1	1	1	1	3	2	23.47	1	0
39455	1.43	0.162	0.67	1.95	4.3	0.2	0.023	0.085	0.028	0.74	0.9	1.56	1	0	0	0	3	46	1	2	1	1	3	1	23.35	3	0
39463	1.24	0.172	0.565	7.83	17.8	1.17	0.126	0.114	0.042	0.14	0.8	2.87	1	0	1	1	1	50	1	2	1	3	3	3	23.05	2	0
39464	1.02	1.63	1.33	6.33	114	1.28	0.13	0.162	0.296	0.6	1.33	0.23	1	0	0	0	3	44	3	2	3	3	1	3	33.4	1	0
39475	1.59	0.257	0.504	3.97	77.9	0.17	0.072	0.151	0.091	0.39	1.15	0.35	1	0	0	1	1	75	2	2	1	2	3	2	19.91	2	0
39476	1.79	0.03	0.299	1.7	128	0.76	0.048	0.065	0.084	0.14	2.22	2.92	1	0	0	0	2	70	1	1	1	1	3	3	28.13	3	0
39478	4.32	0.233	0.399	5.67	41.7	1.02	0.169	0.212	0.058	0.14	1.68	2.01	1	1	0	1	2	57	1	1	1	1	3	1	34.36	2	0
39489	0.51	0.325	0.258	6.88	70	0.5	0.179	0.521	0.107	0.14	0.99	1.09	1	0	0	0	2	26	1	1	1	2	4	2	25.42	3	0
39490	2.02	0.522	0.418	5.84	38.2	1.14	0.057	0.152	0.067	0.35	3.33	2.72	1	1	0	1	1	69	3	1	1	2	3	3	25.97	2	1
39511	0.65	0.401	0.104	1.39	11.6	0.37	0.023	0.033	0.015	2.14	3.19	0.23	1	1	0	1	1	65	3	2	1	2	2	2	23.42	1	0
39531	1.01	0.207	0.606	5.27	48.3	0.27	0.055	0.386	0.242	0.32	0.4	0.78	1	0	0	0	1	23	1	2	2	2	4	2	34.34	3	0
39533	2.15	0.458	0.768	5.06	207	1.87	0.099	0.226	0.112	0.63	2.81	0.48	1	0	0	0	3	65	1	2	1	1	1	1	24.07	3	0
39543	2.62	0.484	0.274	4.53	85.8	1.3	0.05	0.165	0.102	1.47	2.73	2.27	1	1	0	1	1	76	1	2	1	1	3	2	26.51	2	0
39546	0.22	0.078	0.208	2.72	39.9	0.29	0.055	0.073	0.015	0.14	1.6	0.8	1	0	0	0	1	38	3	2	1	3	1	3	29.33	3	0
39547	0.42	0.451	0.642	6.32	17.2	0.71	0.042	0.047	0.023	0.64	3.67	0.47	1	0	0	0	2	83	1	1	1	2	3	2	21.5	2	0
39553	1.99	0.34	0.325	8.77	90.2	1.13	0.154	0.235	0.116	0.48	2.7	1.49	0	0	0	1	1	70	1	2	1	1	3	1	31.79	3	0
39568	0.77	0.152	0.529	4.92	71.4	0.33	0.08	0.203	0.121	0.14	0.37	1.09	1	0	0	0	1	34	3	2	1	2	3	3	31.89	3	0
39570	0.25	0.2	0.284	1.47	14.2	0.32	0.041	0.045	0.015	0.32	1.24	0.14	1	0	1	0	1	51	3	2	1	2	1	3	28.85	3	1
39577	0.66	0.47	0.156	5.71	76.4	0.69	0.051	0.202	0.258	0.61	0.95	0.63	1	0	0	1	1	67	1	2	2	2	1	2	27.18	3	0
39584	6.96	0.139	0.35	4.37	34	0.63	0.058	0.106	0.116	0.39	1.32	1.94	0	1	1	1	3	72	2	2	1	2	4	3	48.06	2	0
39587	0.61	0.03	0.103	1.52	5.17	0.07	0.023	0.111	0.015	0.14	0.7	1.23	1	0	0	0	3	25	3	2	3	3	2	3	20.73	3	0
39591	1.12	1.44	0.601	8.46	209	4.53	0.242	0.197	0.253	0.59	4.73	1.18	1	0	0	0	1	61	1	2	2	1	3	1	23.98	2	0
39599	2.76	0.138	0.412	6.09	42.3	1.26	0.095	0.368	0.111	0.41	2.02	2.55	1	0	0	0	1	37	1	2	1	1	3	3	26.63	1	0
39608	0.72	1.14	0.226	3.81	79.5	2.3	0.14	0.153	0.085	0.47	3.66	0.78	1	0	0	0	3	85	3	1	2	3	3	3	20.72	3	0
39624	3.8	0.207	0.929	8.1	205	1.17	0.094	0.287	0.485	0.14	0.76	4.28	1	0	0	0	1	29	1	2	2	1	3	2	21.4	3	0
39676	2.26	0.517	0.596	5.19	65.7	0.94	0.094	0.181	0.092	0.43	1.48	2.15	1	0	0	0	1	67	1	2	2	1	4	2	35.96	3	0
39700	2.61	0.103	0.603	4.3	125	0.34	0.033	0.203	0.06	0.37	0.52	0.37	1	0	0	0	1	27	1	2	1	2	3	3	26.7	1	0
39717	2.74	0.13	0.405	18.4	117	0.33	0.196	0.197	0.165	0.14	0.9	0.23	1	0	0	0	1	32	2	1	1	1	3	3	27.54	1	0
39723	6.67	0.126	0.188	3.76	73.3	0.32	0.098	0.141	0.106	0.25	1.34	4.21	1	0	0	1	1	59	1	1	1	1	3	1	27.14	2	0
39725	1.12	0.49	0.484	6.29	57.3	0.85	0.165	0.12	0.082	0.46	1.68	0.61	1	1	1	1	1	79	3	2	1	2	3	3	27.45	2	0
39761	0.26	0.646	0.384	1.18	23.7	0.46	0.037	0.051	0.248	0.83	4.93	0.66	1	0	0	1	2	56	3	1	1	2	4	1	27.44	3	0
39765	1.46	0.03	1.85	2.69	31.2	0.77	0.048	0.163	0.058	1.89	2.09	0.81	1	0	0	0	1	34	3	2	3	2	4	3	26.57	1	0
39768	5.32	0.344	0.454	8.17	105	0.6	0.132	0.227	0.703	0.6	1.12	1.98	1	0	0	0	3	34	1	1	3	2	4	3	25.48	1	0
39772	6.75	0.783	0.354	3.42	70.2	0.69	0.064	0.083	0.05	1.24	1.91	0.23	1	0	0	1	1	61	2	1	2	1	3	2	28.36	1	0
39790	0.31	0.03	0.112	1.24	10.4	0.24	0.023	0.088	0.015	0.28	1.67	1.56	1	0	0	1	1	69	2	2	1	1	3	2	26.57	3	0
39793	0.97	0.414	0.271	6.85	45.7	0.47	0.076	0.349	0.036	0.14	1.32	12.6	0	0	0	1	2	70	1	1	1	1	3	1	29.05	3	0
39802	12.9	0.71	0.505	5.26	48.7	0.57	0.078	0.152	0.038	1.16	1.09	2.38	1	0	0	0	1	45	3	2	3	3	4	2	39.65	1	0
39806	0.08	0.03	0.052	0.78	10.4	0.07	0.041	0.027	0.015	0.14	0.69	1.48	1	0	0	0	1	23	2	2	2	2	1	2	20.31	2	0
39828	1.46	0.191	0.29	8.34	74	0.64	0.091	0.243	0.06	0.14	0.44	0.39	1	0	0	0	1	26	1	2	2	2	4	2	31.38	3	0
39833	0.72	0.214	0.161	4.34	53.3	0.29	0.034	0.314	0.034	0.21	0.55	1.03	1	0	0	0	1	37	3	2	1	2	2	2	38.35	3	0
39834	2.1	0.271	0.349	6.14	32.3	2.83	0.069	0.158	0.078	0.2	2.78	1.42	1	0	0	1	3	71	3	2	1	2	3	2	24.46	3	0
39845	1.5	0.154	0.529	7.96	70.1	0.63	0.077	0.221	0.651	0.28	0.82	0.4	1	0	0	0	3	24	1	2	1	2	1	1	34.59	3	0
39847	1.75	0.087	0.3	1.86	85.2	0.07	0.034	0.087	0.015	0.47	0.93	1.45	1	0	0	0	1	34	1	2	1	1	3	1	25.67	3	0
39851	0.85	0.086	0.277	3.05	10.4	0.61	0.039	0.148	0.022	0.14	1.82	0.23	1	0	0	0	2	34	3	2	3	3	1	3	31.27	3	0
39860	2.5	0.092	0.151	4.14	16.4	0.65	0.069	0.232	0.065	0.14	1.87	5.28	1	0	0	1	3	58	1	2	1	1	4	1	35.1	3	0
39869	0.64	0.071	0.06	1.14	5.84	0.21	0.036	0.043	0.015	0.29	2.17	1.67	1	0	0	0	1	48	1	2	1	1	3	1	21.31	3	0
39884	0.41	0.236	0.152	2.28	15.4	0.23	0.106	0.162	0.041	1.16	1.36	1.46	1	0	0	0	1	47	1	2	3	1	3	2	22.27	1	0
39896	1.08	0.361	0.415	8.9	80.3	3.23	0.103	0.356	0.115	0.23	2.61	4.6	1	0	0	0	1	32	3	1	2	3	3	3	36.65	3	0
39914	3.05	0.613	0.492	7.01	33.9	1.17	0.053	0.375	0.035	0.39	2.39	6.22	1	0	0	0	1	47	1	2	1	1	3	2	24.85	2	0
39930	0.69	1.78	0.335	8.68	60	1.64	0.076	0.178	0.097	1.34	2.58	0.75	1	0	0	0	1	50	1	1	2	3	3	3	19.37	1	1
39939	4.65	0.089	0.595	4.36	64.1	0.61	0.072	0.105	0.137	0.31	0.81	0.45	1	0	0	0	1	20	1	2	2	2	2	1	23.74	3	0
39941	14.1	0.679	2.18	11	240	0.88	0.132	0.291	0.255	0.35	0.55	0.87	1	0	0	0	1	26	1	2	1	2	4	2	24.12	3	1
39947	0.88	0.811	0.43	11	23.6	1.29	0.153	0.341	0.167	0.5	1.41	1.23	1	0	0	0	3	43	3	2	1	3	1	1	25.55	3	0
39956	2.53	0.436	0.231	4.16	53.2	0.44	0.046	0.104	0.031	0.36	0.71	2.99	1	0	0	0	3	35	2	2	1	2	1	2	24.59	3	0
39957	1.13	0.113	0.536	4.26	26.4	1.25	0.727	0.229	0.185	0.14	1.55	0.23	1	0	0	0	3	34	3	2	3	3	1	1	23.69	3	0
39958	1.68	0.927	0.698	5.49	64.4	1.07	0.101	0.187	0.566	0.36	1.37	0.35	1	0	1	1	3	78	2	2	1	2	1	3	23.36	3	0
39963	1.51	0.939	1.17	6.21	8.13	0.76	0.121	0.157	0.048	5	2.4	0.54	1	1	0	0	2	41	3	2	2	3	3	3	35.83	1	0
39970	0.4	0.344	0.261	3.69	69	1.54	0.096	0.357	0.293	0.14	3.44	0.23	0	0	0	1	3	71	3	2	2	2	4	3	36.26	3	0
39976	0.44	0.194	0.65	7.54	72.9	3.42	0.058	0.215	0.04	0.21	7.3	0.34	1	0	0	0	1	70	3	1	1	3	1	2	31.27	2	0
39982	0.21	0.03	0.029	0.472	7.06	0.07	0.023	0.016	0.015	0.14	0.18	0.94	1	0	1	0	3	27	1	2	1	2	3	1	29.91	3	0
39989	1.9	0.508	1.36	4.43	71.6	0.63	0.084	0.236	0.092	0.59	1.26	0.83	1	0	0	0	1	44	1	2	2	3	5	2	27.11	3	0
40000	1.55	0.094	0.421	3.93	75.7	0.25	0.108	0.181	0.142	0.14	0.64	0.59	1	0	0	0	1	21	1	1	2	2	3	1	30.81	3	0
40001	1.07	0.208	0.241	5.44	35.2	0.6	0.091	0.124	0.078	0.76	1.25	2.24	1	0	0	0	1	38	1	2	1	1	3	1	24.8	1	0
40004	1.5	0.495	0.303	1.88	30	0.5	0.092	0.061	0.154	0.22	1.89	1.57	1	1	0	1	1	51	2	2	1	2	3	3	31.75	2	0
40010	5.61	0.201	0.771	5.52	110	1.14	0.243	0.176	0.265	0.33	2.32	0.23	1	1	1	1	3	63	1	2	2	1	3	3	29.96	3	0
40011	0.08	0.049	0.041	1.31	7.86	0.07	0.023	0.043	0.015	0.14	1.05	1.02	1	0	0	0	1	36	1	1	2	2	1	1	23.38	2	0
40025	0.3	0.098	0.127	1.36	20.2	0.36	0.023	0.031	0.039	0.26	2.59	0.23	1	1	0	1	1	61	3	1	1	2	1	3	26.43	3	0
40034	1.25	0.068	0.34	1.45	11.2	0.2	0.033	0.05	0.035	0.34	0.8	1.51	1	0	0	1	3	33	1	2	1	3	3	2	32.01	3	0
40038	0.92	0.443	0.343	3.55	40.3	0.68	0.067	0.186	0.091	0.14	2.43	0.8	1	0	0	0	1	38	1	1	1	1	1	2	29.2	3	0
40039	2.93	0.252	0.433	10.4	86.7	0.6	0.501	0.21	0.474	0.31	0.35	0.62	1	0	0	0	1	21	3	2	2	3	3	3	36.14	2	0
40044	2.16	0.081	0.424	0.727	16.8	0.27	0.068	0.025	0.043	0.56	3.2	0.23	1	0	1	1	2	79	1	2	2	2	3	2	29.69	3	0
40055	0.17	0.03	0.053	0.742	17.4	0.14	0.023	0.036	0.059	0.21	1.49	1.55	1	0	0	0	1	44	1	1	2	3	3	3	27.62	3	0
40058	0.25	0.254	0.177	2.79	16.7	0.16	0.023	0.095	0.022	2.05	1.44	0.63	1	1	0	0	1	40	1	2	2	2	3	3	31.05	1	0
40061	1.39	0.03	0.276	4.64	71.6	0.62	0.033	0.156	0.178	0.14	1.88	1.99	1	0	0	1	1	31	1	1	1	1	3	3	23.85	2	0
40063	5.23	0.129	0.853	5.68	133	1.83	0.116	0.156	0.1	0.14	2.91	0.23	1	0	0	1	1	25	3	1	2	2	1	3	28.33	3	0
40064	1.82	0.312	0.678	7	83.5	2.5	0.274	0.175	0.095	0.14	2.57	0.5	1	0	0	0	3	56	3	1	1	2	1	3	31.34	3	0
40082	4.59	0.634	0.779	4.83	73.4	1.08	0.327	0.271	0.099	0.31	1.71	1.58	1	0	0	0	1	44	2	1	1	2	2	3	28.41	3	0
40096	4.91	0.109	0.718	3.53	71.6	0.22	0.048	0.101	0.158	0.2	0.72	0.5	1	0	0	0	1	31	1	2	1	1	3	2	23.68	3	1
40108	1.05	0.144	0.304	6.18	78.4	0.77	0.069	0.207	0.057	0.28	2.03	2.71	1	0	0	0	1	46	2	1	1	2	3	2	27.22	2	0
40124	0.17	0.859	0.606	2.6	84.3	0.43	0.032	0.057	0.147	1.6	3.97	0.23	1	0	1	1	1	80	3	2	2	2	4	2	22.8	1	0
40133	1.2	0.087	0.222	2.34	10	0.17	0.023	0.071	0.077	0.45	0.59	0.98	1	0	0	0	1	21	1	2	2	3	1	1	16.77	1	0
40136	0.74	0.076	0.125	2.63	31.6	0.3	0.064	0.059	0.054	0.23	0.79	0.72	1	0	0	0	1	31	1	2	1	1	1	2	22.33	2	0
40144	2.12	0.158	0.598	3.8	33.2	0.24	0.062	0.144	0.103	0.56	0.79	0.23	1	0	0	0	2	24	2	2	3	3	1	1	28.9	3	0
40152	1.07	0.325	0.256	10.7	41.5	0.69	0.063	0.252	0.065	0.31	1.15	0.6	1	0	1	0	3	68	1	1	1	1	1	2	29.08	3	0
40153	1.86	0.197	0.244	4.26	69.5	0.57	0.108	0.112	0.091	0.75	1.42	0.23	1	0	0	0	3	46	3	1	1	1	1	3	26.44	1	0
40169	1.36	0.083	0.284	4.78	91	0.56	0.409	0.25	0.079	0.14	1.23	1.69	1	0	0	0	1	27	2	1	2	2	3	3	27.36	2	0
40220	0.68	0.069	0.129	2.02	12.5	0.34	0.037	0.089	0.025	0.25	2.23	1.57	1	0	0	0	1	45	1	2	1	1	3	2	25.57	2	0
40244	1.26	0.546	0.257	13.1	49	0.89	0.068	0.282	0.404	0.37	2.13	2.52	1	0	0	1	1	46	1	1	1	1	4	1	26.77	3	0
40256	1.46	0.119	0.461	3.45	90.2	0.38	0.853	0.238	0.107	0.36	0.77	0.23	1	0	0	0	3	29	1	2	1	1	1	2	27.01	3	0
40265	1.03	0.616	0.883	2.79	33	0.2	0.023	0.119	0.071	1.01	0.8	0.83	1	0	0	0	3	52	1	2	1	2	3	1	22.74	3	0
40282	0.63	0.158	0.057	1.22	12.5	0.33	0.023	0.045	0.015	0.25	1.35	0.5	1	0	0	0	3	67	2	2	1	2	1	2	29.13	3	0
40290	9.51	0.627	2.14	7.64	67.9	0.91	0.139	0.249	0.133	0.45	0.64	1.08	1	0	0	0	3	31	1	2	2	2	4	1	44.55	3	0
40291	0.23	0.093	0.133	1.54	24.5	0.39	0.046	0.084	0.084	0.27	2.49	0.54	1	0	0	0	3	28	2	1	1	1	1	3	24.88	3	0
40318	1.13	0.104	0.114	2.19	28.4	0.25	0.038	0.045	0.03	0.26	1.54	0.71	1	1	1	0	2	74	1	1	1	2	5	1	29.28	2	0
40335	0.55	0.384	0.333	6.18	83.3	0.42	0.1	0.155	0.143	0.24	0.48	0.69	0	0	1	1	3	61	2	2	1	1	5	2	31.76	3	0
40358	5.23	2.23	0.425	7.77	56.1	1.61	0.041	0.356	0.062	0.56	2.48	2.68	1	0	0	0	2	63	1	2	3	2	3	2	30.17	2	0
40364	1.74	0.315	0.41	9.76	47.7	1.12	0.169	0.328	0.046	0.25	1.58	3.81	1	0	0	0	1	52	1	1	2	1	1	1	28.76	3	0
40373	4.69	0.327	0.669	12.1	64.6	0.97	0.111	0.456	0.041	0.14	1.77	3.44	1	0	0	0	3	43	3	1	3	3	3	1	23.52	2	0
40378	4.43	0.391	0.656	4.08	50.7	1.01	0.15	0.21	0.247	2.35	2.49	0.23	1	0	0	1	1	34	2	1	1	3	3	1	28.16	1	0
40382	5.45	0.519	0.387	6.41	58.7	1.93	0.059	0.215	0.108	0.96	2.91	0.23	1	0	0	1	3	83	1	1	2	1	3	3	28.79	3	0
40388	1.02	0.17	0.226	3.88	38.5	1.13	0.145	0.212	0.214	0.14	0.94	0.48	1	0	0	0	1	22	3	1	3	2	4	1	39.17	2	0
40389	0.54	0.264	0.278	3.95	22.7	1.34	0.072	0.163	0.041	0.34	3.7	7.37	0	0	0	0	2	71	2	1	2	2	3	2	49.13	2	0
40399	2.52	1.44	0.257	7.7	81.1	0.94	0.083	0.171	0.08	0.71	2.11	1.82	0	1	0	1	2	85	1	1	1	1	3	2	23.96	2	0
40408	0.35	0.453	0.159	3.86	55.7	0.85	0.239	0.118	0.09	1.03	1.82	0.23	1	0	1	1	2	49	2	1	3	1	4	3	45.27	1	0
40420	0.56	0.394	1.54	7.63	53.1	0.94	0.156	0.226	0.064	0.32	0.85	0.23	1	0	0	0	3	25	3	2	3	3	2	3	25.79	3	1
40421	0.37	0.03	0.137	0.346	17.2	0.11	0.023	0.027	0.015	0.74	0.74	0.87	1	0	0	0	1	40	2	2	1	2	4	1	19.5	3	0
40431	1.39	0.185	0.376	6.34	53.5	1.2	0.083	0.338	0.047	0.14	2.35	1.02	1	0	0	1	1	34	2	1	1	2	3	1	28.37	3	0
40433	4.15	0.158	0.347	4.06	94	0.55	0.147	0.2	0.366	0.2	0.83	1.24	1	0	0	0	1	22	2	1	2	2	3	3	21.85	1	0
40434	0.69	0.086	0.065	3.3	32.2	0.24	0.076	0.092	0.158	0.14	1.38	3.45	1	0	0	0	1	38	2	1	1	1	3	3	27.77	3	0
40436	0.88	0.03	0.238	3.44	46	0.2	0.023	0.131	0.039	0.14	0.83	3.16	1	0	0	0	1	23	1	1	2	1	3	1	22.79	3	0
40459	1.49	0.22	0.134	2.83	8.42	0.31	0.04	0.058	0.025	0.7	1.89	1.19	1	0	0	0	1	54	2	1	1	1	3	2	24.49	1	0
40465	3.54	0.278	3.16	10.5	170	0.85	0.16	0.358	0.43	0.32	0.55	1.19	1	0	0	0	1	26	2	2	1	2	2	2	33.08	3	0
40467	0.83	0.049	0.097	1.2	12.1	0.52	0.036	0.047	0.041	0.14	0.91	0.23	1	0	0	0	3	25	3	2	1	2	1	3	22.2	3	0
40481	1.27	0.279	0.36	3.23	132	0.42	0.11	0.138	0.439	0.14	0.89	0.46	1	0	0	1	1	36	1	1	1	1	4	1	35.32	3	0
40483	0.92	0.168	0.298	6.32	104	0.3	0.095	0.469	0.04	0.14	0.58	0.58	1	0	0	1	1	24	1	1	1	1	4	1	31.23	3	0
40490	6.23	0.368	0.755	5.67	75.4	0.68	0.649	0.218	0.104	0.23	0.4	2.73	1	0	0	0	1	36	2	2	3	2	5	2	26.26	3	0
40501	0.89	0.136	0.256	3.06	11.9	0.34	0.297	0.131	0.146	1.49	0.81	1.96	1	0	0	0	1	20	3	2	3	2	4	3	19.76	3	0
40514	0.52	0.162	0.223	8.43	44.7	0.16	0.034	0.075	0.037	0.27	0.47	1.15	1	0	1	1	1	45	1	2	2	1	3	1	56.22	3	0
40515	0.84	0.657	0.884	2.86	31	0.57	0.107	0.067	0.06	1.22	2.55	0.84	1	1	0	1	2	73	2	1	2	2	3	3	22.33	1	0
40530	1.91	0.178	0.635	5.23	25.9	0.76	0.274	0.217	0.252	0.98	0.72	0.23	1	0	0	0	1	24	3	2	2	3	3	3	23.13	1	1
40540	0.44	0.121	0.371	5.69	5.85	0.2	0.023	0.091	0.015	0.55	2.18	0.66	1	1	0	0	3	82	1	1	2	1	3	3	28.52	2	0
40545	1.03	0.67	0.279	4.96	31.6	1.27	0.038	0.242	0.03	0.24	1.44	1.21	1	0	0	0	1	78	1	2	2	1	3	2	19.91	2	0
40557	1.35	0.396	0.33	5.61	40.1	0.84	0.203	0.186	0.197	0.14	1.42	7.09	1	0	1	1	1	58	1	2	1	1	3	1	36.2	3	0
40564	2.45	0.288	0.587	11.7	95	2.89	0.16	0.229	0.389	0.14	1.96	1.14	1	0	0	0	1	26	3	1	1	3	1	1	28.3	3	0
40573	0.31	0.168	0.234	3.3	29.9	0.21	0.083	0.094	0.028	0.42	1.27	0.9	0	1	1	1	3	83	3	2	2	1	3	3	30.67	2	0
40575	2.41	1.11	0.311	7.84	64.5	0.95	0.05	0.185	0.232	0.84	1.99	1.87	1	1	1	1	2	85	2	1	2	2	3	2	28.48	2	0
40583	2.25	0.285	0.668	24.4	127	0.48	0.05	0.404	0.136	1.44	0.9	1.16	1	0	0	1	1	30	1	1	2	3	3	1	31.05	1	0
40589	3.45	0.528	0.441	7.15	66.4	0.75	0.143	0.357	0.049	0.4	1.48	3.73	1	0	0	0	1	35	1	1	1	1	5	1	26.62	3	0
40592	0.41	0.19	0.456	4.73	75.6	0.33	0.057	0.278	0.065	0.26	0.81	1.22	1	0	0	0	3	40	1	2	1	1	5	1	22.87	3	0
40596	0.78	0.443	0.281	4.06	8.11	1.3	0.047	0.201	0.09	0.94	3.59	0.86	1	0	0	0	1	44	2	1	2	3	4	1	23.38	1	0
40612	0.22	0.289	0.145	4.59	31.3	0.12	0.052	0.08	0.045	0.14	0.67	0.86	1	0	1	1	3	36	3	1	1	3	4	3	58.13	3	0
40630	4.24	0.102	0.476	3.08	49.4	0.69	0.07	0.147	0.075	0.21	2	0.33	1	0	0	0	1	20	2	1	3	2	4	1	39.4	3	0
40655	4.19	0.204	0.44	5.01	105	0.74	0.123	0.082	0.234	0.26	1.31	1.13	1	0	0	0	3	38	1	1	1	2	5	1	30.94	3	0
40674	1.45	0.245	0.22	8.73	99.5	0.48	0.041	0.235	0.093	0.21	0.81	0.71	1	0	0	0	3	37	1	1	1	1	3	1	27.11	3	0
40681	0.49	0.347	0.424	10.6	67.4	0.73	0.129	0.504	0.093	0.27	0.68	8.88	1	0	0	0	1	32	3	2	2	1	4	3	26.03	3	0
40688	1.58	0.239	0.498	9.42	68.7	2.18	0.075	0.297	0.068	0.14	3.82	0.68	1	0	0	1	1	43	1	1	1	2	3	2	27.17	3	0
40702	1.24	0.602	0.248	8.79	74.6	0.92	0.101	0.208	0.426	0.22	1.42	1.32	1	0	1	0	1	49	2	1	1	1	3	3	38.28	3	0
40706	1	0.03	0.365	2.54	20.8	0.23	0.038	0.117	0.066	0.24	0.51	1.37	1	0	0	0	3	23	1	2	2	3	4	1	23.99	3	0
40725	1.93	0.156	0.482	5.49	82.6	0.6	0.271	0.235	0.127	0.14	1.1	0.89	1	0	0	0	2	40	2	1	1	2	3	1	24.68	3	0
40737	1.02	0.124	0.089	1.34	11.9	0.29	0.101	0.07	0.057	0.38	1.86	1.39	1	0	0	0	1	63	1	2	1	1	3	3	31.04	3	0
40755	0.56	0.116	0.11	1.87	18.4	0.56	0.023	0.086	0.034	0.28	3.96	2.76	0	0	0	0	1	70	3	2	1	2	3	2	31.01	3	0
40763	1.84	0.475	0.179	1.62	38.3	0.49	0.034	0.049	0.039	0.9	4.35	0.81	1	0	0	1	1	66	2	2	2	2	3	3	27.53	2	0
40765	0.79	0.256	0.296	5.9	25.1	0.53	0.038	0.186	0.041	0.47	1.93	10.2	1	0	0	1	1	59	1	2	1	1	3	1	18.89	2	0
40767	1.62	0.618	0.47	4.96	48.6	1	0.023	0.131	0.046	1.02	3.39	5.32	1	0	0	0	1	61	1	2	2	2	3	2	25.84	2	0
40791	2.93	0.055	0.35	4.36	52	0.81	0.1	0.153	0.076	0.37	0.85	0.23	1	0	0	0	1	29	1	2	3	2	3	3	24.78	1	0
40800	0.98	0.332	0.206	3.76	57.1	0.6	0.023	0.129	0.024	0.54	2.25	1.35	0	0	0	1	1	81	2	1	1	2	3	2	31.38	2	0
40829	4.1	0.827	21.6	8.96	147	0.86	0.117	0.243	0.133	0.2	0.57	1.23	1	0	1	0	1	56	3	2	2	2	1	1	27.24	3	1
40850	1.63	0.398	0.277	7.18	48.5	0.65	0.066	0.138	0.033	1.11	1.78	1.81	1	0	1	0	1	56	1	1	1	1	3	3	36.26	1	0
40857	1.12	0.205	0.353	4.38	87.6	0.95	0.14	0.232	0.141	2.53	1.62	0.23	1	0	0	0	1	24	1	1	3	2	4	1	32.9	1	0
40861	1.22	0.6	1.12	4.6	39.8	1.32	0.068	0.147	0.062	0.43	2.76	1.31	1	0	0	0	3	46	1	2	2	1	4	1	26.67	3	0
40869	1.04	2.14	1.32	9.77	84.1	1.48	0.086	0.316	0.084	0.96	1.67	1.39	0	0	0	1	2	85	1	2	1	1	3	3	29.29	2	0
40877	0.5	0.074	0.162	1.84	16.5	0.25	0.023	0.084	0.081	0.22	2.06	0.9	1	0	0	0	1	41	3	1	1	3	1	3	28.4	3	0
40890	0.73	1.91	0.357	7.12	45.6	0.95	0.089	0.216	0.077	1.81	1.08	0.23	1	0	0	0	1	40	3	2	1	3	3	3	18.27	1	0
40906	4.9	0.258	0.511	5.01	77.4	0.38	0.096	0.221	0.373	0.14	0.18	1.26	1	0	0	0	1	35	1	1	2	1	3	1	33.16	2	0
40921	1.76	0.696	0.583	6.05	42.3	1.98	0.282	0.234	0.055	1.54	2.5	0.52	1	0	0	0	1	52	1	2	1	1	3	3	29.34	1	0
40926	0.65	0.14	0.65	3.04	125	0.88	0.051	0.045	0.033	0.24	1.99	0.23	1	0	0	0	3	22	3	2	1	2	1	3	21.94	2	0
40940	0.08	0.112	0.181	4.61	26.2	0.82	0.041	0.065	0.074	0.3	3.95	1.11	1	0	0	1	3	85	2	1	2	2	3	3	21.86	3	0
40949	3.41	0.41	4.55	16.1	75.4	1.76	0.275	0.225	0.276	0.14	0.98	0.74	1	0	0	0	3	26	3	2	1	2	3	3	30.3	3	0
40951	1.12	0.408	0.222	4.28	22.6	1.17	0.181	0.201	0.04	0.41	2.12	1.01	1	0	0	1	3	53	1	2	1	2	4	3	39.09	3	0
40961	0.95	0.03	0.062	1.77	5.49	0.19	0.023	0.035	0.015	0.27	1.86	3.09	1	0	0	0	2	53	2	2	1	1	3	1	21.52	2	0
40963	0.3	0.075	0.231	1.99	26.9	0.15	0.147	0.125	0.015	0.34	1.17	0.66	0	1	0	1	2	55	1	1	2	2	3	1	39.67	3	0
40965	0.83	0.369	0.259	5.12	21	1.59	0.162	0.189	0.289	0.75	3.9	1.01	1	0	0	1	1	50	1	1	1	1	1	2	27.74	1	0
40980	1.13	0.667	0.619	9.4	83.2	0.39	0.321	0.205	0.083	0.81	0.65	1.1	1	0	1	1	2	40	2	2	1	2	3	3	43	1	0
40985	1.36	0.468	0.501	8.61	67.8	0.99	0.129	0.179	0.193	0.44	1.38	4.92	1	0	0	0	1	44	1	2	1	1	3	1	20.98	2	0
41010	0.68	0.165	0.43	7.19	36.5	0.67	0.511	0.206	0.025	0.28	0.75	2.2	1	0	0	0	3	26	3	1	3	3	1	1	25.09	3	0
41022	1.17	0.34	0.205	3.93	60.1	0.55	0.161	0.092	0.071	0.24	1.86	0.94	0	0	1	1	2	66	3	1	1	1	4	2	31.13	2	0
41026	0.28	0.107	0.074	2.56	10.4	0.3	0.023	0.045	0.015	0.59	2.53	0.23	0	1	1	1	3	83	3	2	1	3	4	3	24.46	3	0
41033	0.83	0.165	0.533	5.26	26.1	0.2	0.186	0.223	0.05	0.14	0.63	0.23	1	0	0	0	1	20	1	2	2	1	4	3	30.82	3	0
41036	0.58	0.266	0.223	4.82	31.3	0.77	0.088	0.198	0.083	0.76	1.9	0.71	1	0	0	1	1	37	3	1	3	3	3	2	38.5	1	0
41044	0.29	1.31	0.779	2.39	19.3	0.2	0.023	0.15	0.023	1.56	0.83	2.17	1	0	0	0	2	43	3	2	1	1	5	3	22.8	1	0
41046	0.27	0.135	0.13	3.39	27.1	0.43	0.023	0.122	0.022	0.14	1.19	2.85	1	0	0	0	1	46	1	2	1	2	2	3	26.64	3	0
41048	2.06	1.06	0.463	5.57	89.2	0.66	0.06	0.301	0.105	0.66	1.5	1.03	1	0	0	1	1	40	1	2	2	2	4	1	40.92	3	0
41049	3.87	0.747	0.667	17.5	58.2	1.49	0.272	0.404	0.153	0.25	1.71	9.41	1	0	0	0	1	52	1	2	1	1	3	1	24.42	3	0
41074	4.39	0.323	0.37	9.72	137	1	0.13	0.392	0.048	0.25	1.01	1.09	1	0	0	0	1	34	1	1	1	1	3	1	24.45	2	0
41087	2.61	0.42	0.365	7.75	87.8	1.41	0.129	0.201	0.141	0.28	2.54	3.4	1	0	0	1	2	51	1	1	1	1	3	3	35.64	2	0
41089	1.84	0.06	0.088	0.808	9	0.33	0.023	0.04	0.025	0.71	2.51	0.69	1	0	0	0	3	47	1	2	1	2	3	2	37.68	1	0
41094	0.24	0.412	0.341	9.62	66.3	2	0.258	0.123	0.171	0.14	1.3	1.04	1	0	1	1	2	46	1	1	1	1	3	2	42.67	3	0
41097	1.38	0.244	0.32	5.47	93	0.39	0.059	0.176	0.091	0.55	0.96	2.31	1	0	0	0	3	22	1	2	2	3	5	1	18.7	3	0
41105	0.86	0.482	0.386	19.7	198	1.65	0.17	0.405	0.173	0.48	1.93	0.43	1	0	0	1	3	66	1	2	2	3	4	2	40.19	3	0
41111	16	0.519	1.31	12.4	144	1.46	0.109	0.412	2.679	0.36	0.73	3.69	1	0	0	0	1	25	1	1	2	3	3	1	26.24	1	0
41123	1.02	0.326	0.587	7.6	84.4	1.79	0.055	0.463	0.024	0.14	1.04	0.6	0	0	0	0	3	32	3	2	1	3	1	3	35.7	3	0
41167	6.88	0.549	0.448	6.23	70.1	1.62	0.658	0.244	0.1	0.29	1.96	1.34	1	0	0	0	3	52	2	2	2	2	4	3	44.5	3	0
41175	8.78	0.416	0.606	7.61	72.9	3.85	0.102	0.296	0.188	0.25	3.17	0.38	1	0	0	0	1	52	1	1	1	3	3	3	31.89	2	0
41179	0.6	0.08	0.153	4.32	10.8	0.22	0.023	0.164	0.027	0.5	1.17	0.83	1	0	0	0	1	36	1	1	1	1	3	3	29.36	1	0
41189	1.9	0.162	0.896	5.4	53.4	0.28	0.099	0.079	0.073	0.65	0.64	0.58	1	0	0	0	1	28	2	2	3	3	3	2	19.48	1	0
41190	1.66	0.363	0.167	2.86	20.9	1.09	0.038	0.122	0.061	0.35	4.36	1.2	1	0	0	1	1	65	1	1	1	2	3	2	28.44	2	0
41191	4.22	2.95	0.78	7.7	131	4.22	0.207	0.285	0.167	1.05	6.27	0.7	1	0	0	1	2	48	2	1	1	3	3	1	31.5	1	0
41194	0.64	0.575	0.145	1.95	11.8	0.47	0.038	0.07	0.015	1.21	1.84	0.81	1	0	0	1	3	66	3	2	1	2	3	3	32.47	1	0
41201	1.31	0.76	0.818	8.32	80	0.6	0.099	0.318	0.061	1.85	1.11	0.6	1	0	0	0	1	39	1	2	1	2	4	3	39.72	1	0
41208	2.7	0.343	0.515	10.4	211	0.99	0.091	0.345	0.145	0.38	0.56	1.65	1	0	0	1	1	46	2	2	1	1	3	2	38.95	2	0
41212	1.82	0.169	0.688	3.49	64	0.33	0.075	0.162	0.254	0.21	0.61	1.01	1	0	0	0	3	41	3	2	1	2	2	2	32.42	3	0
41220	6.65	0.188	0.15	1.39	17.2	1.72	0.171	0.031	0.031	0.67	5	1.23	1	1	0	1	3	82	3	1	2	2	4	3	20.85	3	1
41234	2.63	0.228	0.275	2.94	32.6	0.92	0.042	0.173	0.117	0.31	2.77	2.23	1	1	1	1	2	78	1	1	1	2	3	3	33.03	2	1
41236	1.3	0.058	0.163	1.83	25.5	0.19	0.046	0.06	0.015	0.14	1.18	0.43	1	0	0	0	2	57	1	1	1	1	3	2	29.97	3	0
41238	3.85	0.662	0.334	3.46	24.6	0.82	0.045	0.099	0.015	0.95	3.81	1.9	1	0	0	0	1	53	1	1	2	2	3	3	23.97	1	0
41240	4.73	0.262	0.476	4.33	43.7	0.22	0.07	0.144	0.027	0.25	0.52	0.23	1	0	0	0	3	26	1	2	1	2	3	2	37.08	3	0
41244	3.83	0.418	0.885	8.08	38.7	0.82	0.049	0.245	0.015	0.58	1.81	1.44	1	0	0	1	1	51	1	2	1	1	3	3	41.95	2	0
41253	1.38	0.12	0.47	8.83	32	0.26	0.045	0.217	0.175	0.14	0.33	1.59	1	0	1	0	3	36	3	2	1	2	2	2	28.93	3	0
41265	1.72	0.444	0.561	6.2	29.4	0.8	0.063	0.218	0.084	0.3	1.15	1.88	1	0	0	0	1	44	1	2	2	2	4	1	36.72	3	0
41269	1.83	0.603	0.35	4.18	39	2.57	0.045	0.228	0.046	0.44	3.44	0.9	1	0	1	1	2	64	2	2	2	2	4	3	49.36	3	0
41286	2.94	0.766	0.691	7.73	83.2	0.86	1.06	0.162	0.088	0.3	1.22	0.23	1	0	0	0	1	53	3	2	1	3	1	3	32.21	3	0
41289	2.32	0.192	0.205	3.3	45.9	0.87	0.037	0.137	0.039	0.14	3.8	0.9	1	0	0	0	1	26	2	1	3	3	4	1	30	3	0
41292	1.22	0.272	0.533	5.16	109	1.23	0.154	0.169	0.058	0.35	1.12	0.5	1	0	0	0	1	37	3	1	1	2	1	3	29.8	3	0
41303	4.36	0.428	0.491	4.16	71.9	0.52	0.154	0.209	0.233	1.28	1.1	0.47	1	0	0	0	1	25	1	1	3	1	3	1	47.82	1	0
41304	1.37	0.05	0.221	2.22	21.5	0.12	0.023	0.081	0.066	0.23	0.64	6.86	1	0	0	0	2	34	1	1	3	1	3	1	28.6	3	0
41313	1.97	0.354	0.353	10.1	10.9	1.77	0.5	0.264	0.248	0.32	2.11	2.46	1	0	0	1	1	34	1	1	2	1	4	1	28.64	1	0
41338	7.19	0.269	1.55	4.86	129	0.73	0.127	0.198	0.112	1.93	1.06	0.23	1	0	0	1	3	21	3	2	2	2	4	1	36.53	1	0
41350	3.59	0.792	1.06	7.94	79	1.12	0.146	0.249	0.109	0.66	2.14	0.39	1	0	0	0	2	79	1	1	2	2	3	2	30.91	2	0
41362	0.59	0.285	0.132	1.99	38.4	0.53	0.061	0.039	0.036	0.48	2.91	0.51	1	1	0	1	3	84	2	2	2	2	3	3	30.54	3	0
41374	7.21	0.371	4.05	12.1	171	1.55	0.118	0.356	0.231	0.53	1.17	1.67	1	0	0	0	1	21	2	2	2	3	3	1	21.77	2	0
41389	0.59	0.435	0.994	7.18	60.6	2.22	0.093	0.298	0.042	0.39	1.63	1.27	1	0	0	0	1	25	3	2	1	3	2	2	31.41	1	0
41398	0.19	2.43	0.346	3.16	49.9	0.42	0.387	0.1	0.468	0.34	1.22	0.23	1	0	1	0	3	59	2	2	2	3	3	3	44.89	3	1
41403	0.5	0.2	0.29	8.01	90.1	0.49	0.052	0.108	0.219	0.24	0.71	0.54	1	1	1	0	3	60	2	1	1	1	1	2	37.38	3	0
41415	0.9	0.207	0.231	4.66	52.2	0.91	0.069	0.138	0.064	0.44	4.38	2.8	0	1	0	1	1	85	1	1	1	1	3	3	25.45	2	0
41416	0.62	0.517	0.289	5.46	63.4	1.31	0.057	0.184	0.03	0.48	2.93	0.5	1	0	0	0	1	80	3	1	1	2	3	2	29.93	2	0
41427	0.76	0.461	0.367	5.52	30.7	0.66	0.023	0.105	0.031	0.38	2.18	1.26	1	0	0	1	2	68	2	1	1	2	3	2	36.36	2	0
41436	1.77	0.677	0.397	13.3	101	2.46	0.435	0.423	0.18	0.14	2.11	0.65	1	0	0	1	2	63	2	1	1	1	3	3	33.31	3	0
41439	12.2	0.1	0.521	5.8	54.3	0.22	0.038	0.248	0.039	0.14	0.65	1.13	1	0	0	0	1	21	1	1	2	1	3	1	27.35	3	0
41444	4.46	0.1	0.578	4.22	17.7	0.45	0.046	0.138	0.034	0.22	1.19	0.79	1	0	0	1	1	20	1	1	2	3	2	1	31.04	3	0
41449	4.49	0.207	0.518	6.15	64.1	0.64	0.15	0.2	0.179	0.14	0.74	0.94	1	0	0	0	3	21	3	2	1	3	3	3	18.34	3	0
41458	3.07	0.625	0.446	7.76	164	0.97	0.121	0.301	0.4	0.23	1.07	2.54	1	0	0	0	1	46	2	1	1	2	1	1	28.09	3	0
41462	0.78	0.147	0.143	5.53	29.3	0.83	0.102	0.176	0.068	0.14	2.51	13.8	1	0	0	0	1	56	1	1	1	1	3	1	23.71	3	0
41466	0.58	0.03	0.087	1.19	6	0.17	0.023	0.052	0.015	0.47	1.21	1.79	1	0	0	1	2	58	3	2	2	2	5	3	33.65	3	0
41477	4.64	0.218	0.639	6.74	52.3	0.53	0.066	0.235	0.104	0.14	0.9	1.31	1	0	1	1	3	71	2	1	1	2	3	3	30.05	2	0
41482	2.19	1.03	0.373	4.81	161	0.56	0.056	0.186	0.021	0.42	0.99	0.64	1	0	1	1	1	64	3	1	1	1	1	2	33.64	2	0
41485	0.51	0.145	0.25	2.65	32.8	0.26	0.053	0.064	0.097	0.25	0.53	0.65	1	0	0	0	3	30	3	2	1	2	2	2	25.99	3	0
41493	0.34	1.09	0.281	3.66	15.7	0.3	0.023	0.101	0.054	1.17	2.52	0.5	1	0	0	0	1	77	3	2	2	2	3	3	19.96	1	0
41495	0.74	0.059	0.075	2.48	14.5	0.12	0.023	0.085	0.026	0.14	0.77	0.74	1	0	1	0	1	61	1	1	1	1	3	1	25.53	2	1
41518	3.04	0.297	0.313	6.81	40.5	0.48	0.034	0.124	0.144	0.14	1.35	0.85	1	0	0	0	2	50	1	1	1	1	3	1	29.12	3	0
41519	1.94	1.98	0.857	8.11	116	1.05	0.156	0.363	0.062	0.79	1.6	1.16	1	1	1	1	2	70	2	1	1	2	4	2	28.35	1	0
41526	1.89	0.255	0.336	5.99	18.7	0.82	0.047	0.086	0.04	0.38	3.22	2.25	1	0	0	0	1	64	2	2	2	2	3	2	25.84	2	0
41541	15	0.317	0.782	10.1	106	1.43	0.07	0.302	0.191	0.32	1.62	1.6	1	0	0	1	1	43	1	2	1	1	3	3	35.7	3	0
41542	0.36	0.544	0.123	5.34	21.2	0.62	0.038	0.317	0.052	0.36	1.8	0.69	1	0	1	1	3	60	2	2	1	2	4	3	32.83	3	0
41546	0.98	0.059	0.206	1.8	8.41	0.15	0.036	0.06	0.085	0.27	0.43	0.58	1	0	0	0	1	45	1	2	2	1	3	2	30.81	3	0
41548	4.87	0.184	0.781	9.56	154	0.67	0.103	0.202	0.183	0.27	0.45	1.06	1	0	0	0	1	24	3	2	2	3	3	1	25.06	2	0
41549	3.4	0.427	0.469	6.86	69.8	0.98	0.092	0.162	0.112	0.24	1.11	1.24	1	0	0	1	1	61	2	2	2	3	4	1	35.01	3	0
41562	5.42	0.219	0.417	11.6	64.7	0.83	0.06	0.233	0.098	0.22	0.72	1.1	1	0	1	1	1	50	1	1	2	1	3	3	36.8	3	0
41570	0.37	1.33	0.167	7.88	51.4	0.52	0.041	0.225	0.046	1.43	2.14	0.9	1	1	0	0	3	55	3	1	2	3	3	3	20.62	1	1
41578	2.7	0.548	0.331	4.3	16.8	0.48	0.079	0.16	0.053	0.29	1.4	1.95	0	0	0	1	1	67	1	2	1	1	3	2	19.69	3	0
41589	3.59	0.153	0.611	6.03	139	2.89	0.107	0.294	0.163	0.44	3.4	0.53	1	0	0	0	2	76	1	1	1	2	1	3	29.83	2	0
41590	0.72	0.275	0.279	4.69	46.9	0.55	0.062	0.14	0.063	0.14	0.85	2.07	1	0	0	0	1	25	1	1	1	2	1	1	24.39	3	0
41605	1.69	0.074	0.216	4.21	52.9	0.3	0.04	0.096	0.049	0.2	0.39	0.34	1	0	0	0	1	36	1	2	1	3	3	3	29.69	3	0
41607	0.69	0.217	0.084	1.97	25.5	0.41	0.023	0.137	0.052	0.31	2.42	3.42	1	0	0	0	1	46	2	2	1	1	3	2	26.7	2	0
41612	2.71	0.233	0.218	3.52	116	0.34	0.052	0.115	0.067	0.42	1.3	0.2	1	1	0	0	3	80	3	2	1	2	3	3	28.65	3	0
41616	0.12	0.077	0.053	0.837	8.82	0.11	0.023	0.057	0.015	0.32	1.54	1.2	1	0	0	1	2	67	3	2	2	2	4	3	33.37	2	0
41618	4.14	0.116	0.478	2.7	62	0.23	0.397	0.157	0.163	0.22	0.81	1.16	1	0	1	0	1	46	1	2	1	1	3	2	37.79	3	0
41622	2.83	0.266	0.35	5.72	39.7	0.57	0.141	0.279	0.097	0.34	0.98	0.75	1	0	0	0	3	41	2	2	1	2	3	3	42.69	3	0
41623	2.07	0.101	0.373	2.97	39.4	0.36	0.023	0.095	0.088	0.29	2.2	3.32	1	0	0	0	1	29	1	1	1	2	4	1	36.17	3	0
41624	1.02	0.204	0.135	2.75	46.7	0.21	0.023	0.097	0.073	0.26	0.77	0.62	1	0	1	1	1	68	3	2	1	2	2	2	25.83	3	0
41628	1.68	0.101	0.261	1.02	11.5	0.07	0.035	0.03	0.015	0.35	0.4	0.2	1	0	0	0	1	23	1	2	2	3	3	1	23.35	2	0
41652	0.32	0.263	0.193	2.6	28.4	0.55	0.023	0.099	0.036	0.72	2.92	0.2	1	0	0	1	3	70	1	2	1	1	5	2	26.43	3	0
41666	1.49	0.98	0.594	10.5	151	0.75	0.11	0.252	0.313	0.14	0.5	0.2	1	0	0	1	2	43	1	2	1	2	3	1	32.41	2	0
41675	1.9	0.403	0.247	4.62	8.82	0.45	0.05	0.107	0.021	2.37	1.74	0.2	1	1	1	0	2	71	2	2	2	2	3	3	24.53	1	1
41679	2.35	0.093	0.38	4	68.4	0.88	0.191	0.182	0.089	0.26	1.9	0.2	1	0	0	0	1	21	3	1	2	2	3	3	21.33	2	0
41685	0.43	0.03	0.066	0.264	6.11	0.07	0.023	0.011	0.015	0.14	1	1.52	1	0	0	0	3	25	2	1	2	3	3	1	18.44	3	0
41687	0.18	0.03	0.029	0.748	11.4	0.16	0.023	0.011	0.058	0.14	2.2	0.2	1	0	0	0	1	31	3	1	1	2	1	3	24.21	3	0
41691	1.26	0.249	0.327	4.85	49.8	0.52	0.078	0.154	0.086	0.22	1.7	0.45	1	0	0	1	1	60	2	1	1	1	3	1	31.98	3	0
41702	2.86	0.424	0.406	4.88	38.6	0.33	0.123	0.315	0.135	0.27	1	0.9	1	0	0	1	3	55	2	2	2	1	4	3	45.13	3	0
41711	2.77	0.192	0.467	5.86	212	1.49	0.036	0.085	0.363	0.35	3.31	0.86	0	1	0	1	1	73	2	2	1	1	3	2	29.08	3	0
41715	1.35	0.084	0.235	2.97	34.4	0.46	0.023	0.077	0.28	0.14	1.2	1.2	1	0	0	1	1	74	2	2	1	2	3	2	24.33	3	0
41717	0.9	0.15	0.17	3.75	20.6	0.2	0.189	0.083	0.038	0.46	0.99	0.7	1	0	1	1	3	72	3	2	1	2	3	2	23.87	2	0
41718	1.01	0.521	0.605	6.2	68.7	0.95	0.074	0.217	0.015	1.8	2.4	0.42	1	0	0	0	3	50	3	2	1	3	1	3	35.28	3	0
41727	3.5	0.209	0.464	10.5	91.4	0.47	0.136	0.548	0.1	0.14	0.53	1.34	1	0	0	0	1	22	1	2	2	1	3	1	31.44	3	1
41730	0.19	0.197	0.354	4.02	176	1.18	0.106	0.169	0.348	0.14	2.13	0.52	1	0	0	0	1	35	3	1	1	2	1	2	28.49	1	1
41733	2.56	0.23	0.296	4.09	34.9	0.56	0.063	0.33	0.039	0.14	1.2	5.86	1	0	0	1	1	38	2	1	2	1	3	1	34	3	0
41740	0.55	0.553	0.253	7.94	137	1.76	0.137	1.2	1.252	0.26	4.38	1.69	1	0	0	1	3	79	1	1	2	2	4	1	28.18	3	0
41751	0.7	0.432	0.627	7.88	130	0.43	0.054	0.214	0.129	0.38	0.98	2.87	1	0	1	1	3	73	2	2	1	2	3	2	40.45	3	0
41756	1.13	0.193	0.339	3.92	34.6	1.06	0.023	0.098	0.029	0.33	3.33	0.2	1	0	0	0	3	60	3	2	1	2	1	2	29.56	3	0
41760	0.77	0.131	0.164	1.94	21.9	0.45	0.023	0.052	0.064	0.3	2.3	0.2	1	0	0	1	1	73	2	2	2	2	3	2	28.2	3	0
41762	3.78	0.163	0.326	6.46	135	0.72	0.085	0.299	0.189	0.22	1.65	3.04	1	0	0	0	1	32	1	1	2	1	3	3	34.96	3	0
41767	1.27	0.313	0.237	6.18	62.7	0.42	0.083	0.274	0.317	0.24	0.57	1.1	1	0	0	0	3	21	3	1	2	3	1	2	20.83	3	0
41775	1.37	0.943	0.29	4.25	27.6	0.99	0.062	0.243	0.044	0.43	3.2	1.04	0	0	0	1	1	61	3	2	2	2	4	3	34.75	3	0
41794	1.27	0.172	0.198	3.14	13.8	0.36	0.023	0.071	0.015	1.3	2.3	0.4	1	0	0	0	3	44	2	1	1	2	3	1	30.29	1	0
41802	5.63	0.078	0.267	1.94	26.6	0.22	0.036	0.068	0.054	0.14	0.54	0.37	1	0	0	0	1	30	2	2	1	2	3	2	23.64	3	0
41811	1.15	0.204	0.421	3.26	45.4	0.36	0.063	0.195	0.075	0.14	0.81	1.43	1	0	0	0	1	36	1	2	1	1	1	3	25.14	3	0
41814	2.61	0.996	0.457	4.65	234	5.65	0.09	0.165	0.333	0.6	2.52	1.18	1	0	0	0	3	80	3	1	2	2	3	2	27.97	2	0
41819	0.72	0.072	0.157	2.65	42.2	0.26	0.036	0.087	0.164	0.57	1.01	0.52	1	0	0	0	1	25	2	1	2	3	4	1	29.69	1	0
41834	1.8	0.056	0.09	1.62	18.5	0.24	0.071	0.055	0.142	0.34	1.86	15.3	1	0	0	0	1	43	1	1	1	1	3	1	27.36	1	0
41840	1.65	0.127	0.249	2	7.01	0.35	0.023	0.067	0.076	0.26	2.35	0.87	0	0	1	1	3	75	3	2	1	2	3	2	30.19	3	0
41875	1.71	0.663	0.766	4.22	136	3.02	0.064	0.136	0.015	0.59	3.4	2.15	1	0	1	0	2	51	3	2	1	2	2	3	30.82	3	0
41877	4.82	0.482	1.2	5.5	41.5	4.63	0.118	0.22	0.266	0.48	0.77	0.66	0	0	0	0	1	42	1	2	2	2	4	2	21.87	3	0
41879	0.18	0.245	0.218	2.09	11.7	0.11	0.023	0.064	0.022	0.83	2.2	0.61	0	1	1	0	1	80	1	2	1	2	3	3	31.63	2	0
41897	5.69	0.115	0.325	4.03	31.8	0.56	0.023	0.222	0.193	0.14	1.93	0.38	1	0	0	1	1	77	1	1	1	2	3	2	30.81	2	0
41914	0.6	0.049	0.135	1.52	28.1	0.25	0.034	0.111	0.106	0.36	1.04	0.2	1	0	0	0	1	25	3	1	1	3	3	3	23.68	1	0
41915	2.73	0.503	0.563	6.45	142	1.92	0.105	0.237	0.112	0.3	2.78	2.19	1	0	0	0	1	63	1	2	1	1	3	3	26.65	2	0
41926	1.1	0.386	0.37	8.53	71.2	0.94	0.059	0.295	0.566	1.24	1.63	1.88	1	0	0	0	1	49	2	1	2	1	3	1	28.44	1	0
41946	1.29	0.907	0.313	11.3	119	1.35	0.079	0.551	0.21	0.32	1.98	1.93	1	0	1	1	1	65	2	2	2	2	4	2	32.26	2	0
41961	0.53	0.03	0.1	1.88	67.9	0.2	0.023	0.083	0.045	0.14	0.69	0.39	1	0	1	0	1	46	2	1	1	1	3	2	30.45	3	0
41962	0.66	0.054	0.083	0.701	9.59	0.1	0.023	0.02	0.015	0.21	1.6	0.55	1	0	0	1	1	48	2	1	1	1	3	1	29.51	3	0
41966	0.31	0.211	0.313	2.45	16.5	0.37	0.023	0.107	0.024	0.78	3.25	1.56	1	1	1	1	3	62	2	1	1	2	5	3	21.36	2	0
41968	0.53	0.072	0.065	0.685	11	0.12	0.023	0.03	0.084	1.16	1.2	0.2	1	0	0	0	1	26	3	1	3	3	3	1	19.88	1	0
41969	0.75	1.48	0.393	14.9	137	1.76	0.103	0.43	0.112	0.32	2.13	1.66	1	0	0	1	3	61	2	2	1	2	3	3	32.58	3	0
41990	3.08	0.208	0.309	2.21	36.7	0.39	0.037	0.122	0.015	0.22	1.48	0.2	1	0	0	0	1	45	3	1	2	2	1	1	37.86	2	0
41993	1.93	0.86	0.264	8.45	26.1	1.02	0.023	0.391	0.068	1.64	2.31	3.65	1	0	0	0	1	59	1	2	1	1	3	2	19.67	1	0
41998	1.42	0.044	0.335	2.99	15.6	0.32	0.034	0.146	0.055	0.9	0.85	0.52	1	0	0	0	1	20	2	1	2	2	4	2	24.84	1	1
42015	3.46	0.211	0.19	2.52	60.7	0.54	0.054	0.155	0.119	0.45	2.01	0.2	1	0	0	1	3	79	1	2	1	1	3	2	20.31	3	0
42025	1.92	0.767	1.34	6.51	52	0.68	0.113	0.19	0.026	1.2	1.2	0.62	1	0	0	1	1	43	2	2	2	2	4	2	29.95	1	1
42028	0.69	0.454	0.167	3	28.9	0.52	0.047	0.072	0.015	2.45	2.85	0.79	1	0	0	1	1	45	2	1	2	1	4	2	17.96	3	0
42041	0.29	0.53	0.625	3.17	331	1.66	0.106	0.119	0.136	0.37	3.4	0.53	1	1	0	0	3	80	3	1	1	2	3	3	22.62	3	0
42047	0.54	0.45	0.284	5.54	115	0.59	0.043	0.207	0.229	0.38	1.14	0.77	1	0	0	0	1	52	2	2	1	1	3	2	36.27	3	1
42065	0.5	0.102	0.099	0.75	5.59	0.13	0.023	0.035	0.015	0.14	0.97	0.61	1	0	0	0	1	59	2	2	1	1	1	2	28.02	3	0
42079	1.31	1.3	0.977	5.27	220	2.12	0.113	0.125	0.152	0.85	8.3	0.75	1	1	0	1	1	80	1	1	1	1	3	2	20.71	2	0
42085	5.77	1.57	0.488	5.93	106	1.41	0.132	0.212	0.145	0.77	2.05	0.37	1	0	0	0	1	57	3	2	2	3	3	1	17.85	1	0
42094	2.03	0.775	0.408	2.69	39.6	1.18	0.125	0.143	0.254	0.57	3.7	0.69	1	0	0	1	1	55	3	2	2	3	4	2	31.09	3	0
42096	2	0.106	0.216	4.46	8.68	0.15	0.023	0.094	0.015	0.43	0.75	9.61	1	0	0	0	1	35	1	1	1	1	5	1	28.66	3	0
42099	0.28	0.148	0.153	2.97	20	0.51	0.032	0.099	0.015	0.33	2.7	4.44	1	0	0	1	1	66	1	1	1	1	3	2	36.66	2	0
42103	0.66	1.89	0.665	10.3	116	0.88	0.063	0.179	1.184	0.73	1.8	0.83	1	0	1	1	3	67	2	2	1	1	4	3	29.17	2	0
42104	2.27	0.712	0.221	8.37	16.5	2.18	0.052	0.227	0.051	0.85	5.89	7.47	1	0	0	0	1	71	1	2	2	2	3	2	29.04	3	0
42107	1.32	0.136	0.825	3.69	44.5	0.2	0.023	0.026	0.06	0.79	1.09	1.36	1	0	0	1	2	78	1	1	1	1	3	2	25.7	2	0
42119	1.12	0.074	0.115	1.47	14.4	0.3	0.048	0.043	0.114	0.26	0.97	0.61	1	0	0	0	1	38	3	2	2	3	3	3	37.42	1	0
42134	0.55	0.06	0.156	1.94	15.1	0.45	0.023	0.06	0.027	0.24	0.97	0.54	1	0	0	0	2	27	2	2	1	2	1	1	22.74	3	0
42151	3.74	0.936	1.32	5.2	43.6	0.7	0.115	0.398	0.081	0.44	0.62	2.02	1	0	0	0	3	32	3	2	1	1	2	3	31.03	3	0
42157	0.73	0.176	0.22	8.47	22.2	0.39	0.023	0.114	0.034	0.4	1.44	0.48	1	0	0	0	1	67	1	2	2	1	3	2	28.42	3	0
42159	1.4	0.128	0.336	4.44	46.5	0.14	0.023	0.116	0.015	0.66	0.64	1.13	1	0	0	0	1	43	1	2	1	1	3	1	24.19	3	0
42164	1.78	0.51	0.574	5.59	50.1	1.36	0.083	0.188	0.177	0.84	2.5	0.97	1	0	0	1	1	60	1	1	2	2	1	1	29.11	2	0
42166	3.74	0.206	0.918	6.31	112	0.71	0.23	0.253	0.057	0.33	1.1	0.66	1	0	0	0	1	22	1	1	2	1	4	3	24.89	3	1
42168	0.14	0.124	0.244	4.07	36	0.38	0.092	0.183	0.022	0.2	0.96	0.2	1	0	0	0	1	23	2	2	2	3	2	1	18.58	1	0
42198	5.34	0.574	0.79	6.53	78.9	0.98	0.116	0.377	0.062	0.29	0.87	0.2	1	0	0	0	2	26	1	2	1	2	1	1	37.94	3	0
42200	12.7	0.753	0.553	7.45	69.2	1.97	0.094	0.162	0.366	0.14	2.35	0.58	1	0	1	0	2	65	2	1	1	2	3	3	33.45	3	0
42215	0.82	0.683	0.387	7.76	40.4	2.28	0.039	0.179	0.149	0.82	4.6	4.53	1	0	0	0	2	77	3	1	1	3	2	3	30.89	2	0
42240	1.18	0.296	0.38	4.5	51.5	0.62	0.251	0.151	0.089	0.3	1.4	0.2	1	0	0	0	1	46	1	2	1	1	3	2	29.06	3	0
42246	2.66	0.341	0.29	6.28	44.5	0.79	0.053	0.254	0.062	0.26	1.38	0.93	1	0	0	0	1	36	3	2	1	3	1	1	35.39	3	0
42248	1.2	0.075	0.254	1.92	37.9	0.07	0.023	0.09	0.032	0.34	0.51	2.58	1	0	0	0	1	27	1	2	1	1	3	1	30.33	3	0
42265	1.18	0.346	0.294	8.86	108	0.75	0.044	0.225	0.171	0.14	1.55	1.44	1	0	0	0	1	60	2	1	1	1	2	3	31.22	2	0
42268	0.78	0.28	0.231	4.74	49.8	0.42	0.053	0.19	0.071	0.43	1.55	0.42	1	0	0	0	2	31	2	1	1	2	3	1	28.67	2	0
42269	1.18	0.11	0.171	1.84	16	0.16	0.032	0.027	0.028	0.38	0.79	0.38	1	0	1	1	3	69	3	2	2	2	2	3	27.88	3	0
42273	2.28	0.81	0.683	10.3	180	1.98	0.151	0.209	0.422	0.61	3.95	0.62	1	0	0	0	1	37	1	1	2	3	5	2	20.79	1	1
42280	1.15	0.091	0.14	2.5	9.66	0.18	0.023	0.042	0.038	0.2	1.18	2.35	1	0	0	0	3	58	2	2	2	1	3	2	19.81	3	0
42284	14.2	0.322	0.346	6.29	36.2	0.63	0.023	0.234	0.031	0.54	1.96	1.36	1	0	0	0	1	51	3	2	1	1	1	2	24.13	1	0
42291	2.46	0.264	0.28	4.18	39	0.46	0.023	0.157	0.04	0.34	1.12	1.05	1	0	0	0	1	70	1	2	1	1	3	2	38.2	3	0
42300	6.13	0.65	0.665	9.34	39.3	1.75	0.043	0.222	0.07	0.81	2.38	1.59	1	0	0	0	3	75	1	2	2	3	5	2	27.46	3	0
42308	1.07	0.289	0.765	5.12	42.8	0.77	0.085	0.343	0.138	0.25	1.19	0.91	1	0	0	0	3	23	2	2	2	2	4	3	20.44	3	0
42309	0.42	0.472	0.278	5.09	45.2	0.42	0.036	0.039	0.065	0.51	1.55	0.66	0	0	1	1	1	58	2	2	1	1	1	3	33.16	3	1
42315	0.87	0.558	0.666	12.3	31.8	0.44	0.05	0.297	0.042	1.6	1.9	1.12	1	0	0	0	1	33	1	2	1	2	3	2	19.95	1	0
42321	0.89	0.252	0.238	7.42	20.5	0.43	0.121	0.146	0.037	0.22	1.6	1.89	1	0	1	1	3	62	1	2	2	1	3	3	29.21	3	0
42328	0.58	0.03	0.09	0.963	24.4	0.07	0.023	0.026	0.147	0.14	0.52	0.43	1	0	0	0	1	35	3	1	1	1	3	1	27.23	3	0
42340	2.35	0.402	0.748	7.27	35.8	0.63	0.125	0.265	0.071	0.14	1	5.57	1	0	0	1	1	60	3	2	2	3	1	1	32.35	3	0
42346	0.26	0.092	0.083	3.55	13.4	0.16	0.046	0.059	0.015	0.24	1.23	1.56	1	0	1	1	3	54	2	1	2	1	3	2	30.3	3	0
42357	4.7	0.171	0.913	9.31	23.6	0.22	0.023	0.221	0.029	0.43	0.55	0.2	1	0	0	0	1	25	1	2	1	1	3	1	24.56	3	0
42365	2.22	0.266	0.243	3.19	26.8	0.57	0.032	0.115	0.138	0.36	2.32	2.03	1	0	0	0	3	58	1	2	1	1	3	2	33.98	3	0
42366	0.32	0.189	0.43	3.79	23.2	0.19	0.038	0.123	0.145	0.69	0.82	1.05	1	0	0	1	1	47	1	2	1	1	3	1	24.18	3	0
42369	2	0.527	0.438	3.7	312	0.45	0.069	0.266	1.27	0.28	1.9	1.38	1	0	0	1	1	80	3	2	2	3	4	3	24.85	3	0
42375	0.75	0.03	0.19	3.81	34	0.2	0.023	0.103	0.077	0.33	1.11	0.97	1	0	0	0	1	21	2	1	2	2	3	1	25.2	3	0
42379	0.78	0.564	0.296	5.01	123	0.42	0.032	0.211	0.045	0.39	0.95	1.92	1	0	0	0	3	62	1	2	1	2	2	1	28.57	3	0
42383	11.9	0.228	0.58	5.42	92.2	0.69	1.3	0.338	0.546	0.14	1.4	0.68	1	0	0	0	1	23	1	1	2	3	3	1	23.34	3	0
42387	8.37	0.143	0.961	16.6	107	3.94	0.094	0.231	0.172	0.14	3.96	0.2	1	0	0	0	3	33	2	1	2	2	3	1	27.57	3	0
42391	1.89	0.657	0.341	6.95	96.6	0.83	0.196	0.249	0.21	2.8	1.53	2.24	1	0	0	0	1	25	2	1	2	3	4	1	22.72	1	0
42405	0.29	0.13	0.117	1.59	24.1	0.33	0.035	0.082	0.06	0.24	2.2	0.35	0	1	0	1	3	71	2	2	1	2	3	2	29.05	2	0
42422	2.24	0.727	0.231	9.75	37.8	0.87	0.158	0.511	0.521	0.32	3.74	0.96	1	1	1	1	1	51	3	1	2	2	1	1	23.68	2	0
42425	3.42	0.176	0.693	7.33	164	0.17	0.067	0.23	0.074	0.35	0.42	1.38	1	0	0	0	1	46	1	2	1	1	3	1	33.21	3	0
42429	4.92	0.086	0.306	2.31	17.5	0.2	0.048	0.187	0.035	0.14	1.2	0.62	1	0	0	1	1	29	2	1	1	1	2	1	25.1	3	0
42435	1.82	0.131	0.277	5.08	64.6	0.96	0.035	0.13	0.765	0.25	2.67	1.71	1	0	0	1	1	34	3	1	1	2	1	2	21.2	1	0
42439	3.82	0.489	0.466	5.18	60.1	2.54	0.109	0.15	0.05	0.33	3.7	1.04	1	0	0	0	1	28	1	1	2	3	1	1	27.47	3	0
42446	12.3	0.213	0.904	7.47	108	1.72	0.166	0.349	0.167	0.14	1.7	0.2	1	0	0	0	1	21	3	1	2	3	1	3	27.5	3	0
42454	1.37	0.384	0.253	4.97	34.4	0.49	0.275	0.096	0.048	0.5	1.53	0.38	1	0	0	1	3	80	3	2	2	2	3	2	21	3	0
42459	0.38	0.129	0.154	1.49	13.5	0.25	0.023	0.089	0.148	0.62	2.44	2.17	1	0	0	0	3	57	1	2	1	1	3	2	27	3	0
42464	2.28	0.641	0.278	9.69	45.4	2.17	0.064	0.389	0.015	0.4	2.04	1.55	1	0	0	0	3	52	1	2	3	1	1	3	30.24	2	0
42467	0.52	0.062	0.168	3.9	35.6	0.26	0.046	0.101	0.178	0.14	0.7	0.2	1	0	0	0	1	27	1	2	3	1	3	2	27.67	3	0
42471	1.58	0.269	0.438	5.36	68.6	0.27	0.023	0.214	0.199	0.27	0.88	0.73	1	0	0	1	2	50	1	1	1	1	3	1	27.38	3	0
42475	2.36	0.05	0.31	3.06	34.9	0.17	0.036	0.111	0.161	0.24	0.83	0.37	1	0	0	0	3	27	1	1	2	3	3	1	20.85	3	0
42477	2.99	0.196	0.507	9.32	49.8	1.22	0.645	0.39	0.17	0.51	1.76	2.48	1	0	0	0	1	25	3	1	3	3	1	2	25.05	1	0
42482	0.42	0.663	0.136	2.18	27.8	0.37	0.046	0.101	0.056	4.2	2.1	1.64	1	0	1	1	1	35	2	2	2	3	4	2	30.55	1	1
42490	0.91	0.087	0.189	2.7	33.8	0.25	0.103	0.081	0.11	0.3	1.3	0.54	1	0	1	1	3	46	1	1	1	2	3	3	31.09	3	0
42496	1.72	0.317	0.429	7.02	162	0.84	0.081	0.168	0.166	1.48	1.61	0.2	1	0	0	0	1	43	2	1	3	2	1	1	30.12	1	0
42503	1.96	0.362	0.386	8.6	63.9	0.63	0.172	0.275	0.336	0.23	1.3	2.25	1	0	0	0	2	39	1	1	1	1	1	2	28.1	3	0
42510	1.48	0.172	0.447	4.8	61.5	0.73	0.1	0.227	0.159	0.23	1.16	1.13	1	0	0	1	1	38	1	1	1	2	3	2	31.4	1	0
42516	1.51	0.114	0.307	4.32	16.7	0.51	0.09	0.15	0.21	3.5	1.5	0.2	1	0	1	0	1	25	1	1	2	1	3	1	25.14	1	0
42524	0.97	0.273	0.092	2.91	16.2	0.44	0.047	0.067	0.025	0.32	2.3	0.93	1	1	0	1	1	64	2	1	1	1	3	1	28.03	2	0
42526	7.13	0.209	0.504	10.7	44.4	1.97	0.262	0.339	0.18	0.14	3.05	1.04	1	0	0	1	3	65	1	1	1	1	3	2	26.85	3	0
42528	0.98	0.29	0.602	6.21	22.2	0.43	0.042	0.099	0.078	1.14	0.98	0.38	1	0	0	0	1	41	3	2	2	2	3	1	35.24	1	0
42529	0.55	0.319	0.35	3.5	47.5	1.87	0.081	0.069	0.125	0.38	3.67	0.35	1	1	1	0	2	71	3	1	2	2	3	3	39.7	1	0
42537	1.23	0.44	0.24	5.87	67.7	1.67	0.091	0.271	0.121	0.67	1.8	0.91	1	0	0	1	3	62	1	2	1	2	4	3	29.85	3	0
42566	0.79	0.125	0.156	2.78	26.2	0.81	0.063	0.091	0.045	0.14	1.1	0.33	1	0	0	1	1	32	1	1	1	1	3	2	31.76	2	0
42575	1.38	0.087	0.066	1.98	6.82	0.29	0.023	0.055	0.032	0.4	1.21	1.14	1	0	0	0	1	41	2	2	1	1	3	2	26.88	1	1
42584	1.48	0.303	0.2	7	19.3	0.3	0.067	0.099	0.046	0.14	1.1	2.55	1	0	0	0	1	48	2	1	2	1	3	3	29.12	2	1
42586	3.2	0.261	0.541	9.28	95.2	1.19	0.056	0.374	0.091	0.33	1.19	1.08	1	0	0	1	2	52	1	1	1	1	3	2	29.31	2	0
42591	0.35	0.586	0.292	4.18	54.6	0.5	0.048	0.11	0.083	0.34	1.4	1.5	0	0	0	1	1	68	1	2	2	1	4	1	23.65	3	0
42600	2.19	0.555	1.72	5.77	80.7	0.48	0.07	0.212	0.246	0.41	0.66	0.43	1	0	0	0	2	44	3	2	1	3	2	2	25.27	3	0
42605	5.18	0.848	0.475	4.66	44.4	1.65	0.094	0.118	0.015	0.37	4.4	1.21	1	0	0	0	1	53	1	1	1	1	1	1	30.8	3	0
42607	2.45	0.247	0.75	3.66	30.4	0.33	0.055	0.129	0.152	0.38	0.64	1.17	1	0	0	0	1	32	1	2	2	2	4	2	16.67	3	0
42612	0.29	0.065	0.165	2.21	50.3	0.34	0.023	0.101	0.063	0.23	1.73	1.7	1	0	1	0	3	36	3	1	2	2	2	1	27.95	3	0
42617	9.36	0.43	0.694	8.71	82.6	1.98	0.066	0.198	0.049	0.28	4.32	0.5	1	0	0	0	3	71	1	1	1	1	5	2	23.43	3	0
42621	0.75	0.3	0.28	7.85	121	1.21	0.069	0.35	0.153	0.14	1.85	0.79	1	1	1	1	2	54	2	1	1	3	3	2	34.62	3	1
42629	1.3	0.181	0.169	1.93	28.3	0.16	0.055	0.067	0.015	0.24	0.44	0.4	1	0	1	1	2	60	3	2	2	2	1	3	36.06	3	1
42640	0.78	1.44	0.287	6.77	60.9	1.02	0.093	0.131	3.324	0.26	1	0.95	1	0	0	0	2	79	1	2	2	2	3	3	25.28	3	0
42647	0.76	0.374	0.243	3.72	22.7	0.44	0.052	0.151	0.015	0.24	1.33	0.56	1	0	0	0	1	48	1	1	3	1	1	1	26.45	3	0
42648	2.04	0.4	0.417	6.67	166	0.85	0.057	0.367	0.212	0.29	2.3	1.56	1	0	0	0	2	44	3	1	1	3	3	1	24.24	3	0
42652	2.1	0.269	0.363	11.7	36.3	1.13	0.076	0.388	0.203	0.14	2.3	1.13	1	0	0	1	2	49	3	1	1	1	3	1	34.72	2	0
42654	1.39	0.078	1.64	6.13	80.8	0.55	0.051	0.16	0.15	0.27	0.42	0.41	1	0	0	0	3	25	3	2	2	3	1	3	20.61	3	0
42656	0.32	0.393	0.131	2.37	29	0.41	0.023	0.191	0.075	0.3	1.54	1.22	1	0	0	1	1	55	2	2	1	1	1	1	35.94	3	0
42658	1.57	1.26	0.827	8.6	42	0.94	0.043	0.269	0.066	0.47	1.2	2.8	1	0	0	0	3	60	1	2	2	2	2	1	28.44	2	1
42670	2.54	0.447	0.5	3.25	36.2	0.59	0.044	0.201	0.015	0.75	1.2	1.32	1	0	0	1	3	62	2	2	1	2	3	2	29.29	1	0
42673	1.14	0.823	0.504	2.08	31.1	1.03	0.048	0.113	0.309	1.04	4.15	1.54	1	0	0	1	3	65	3	2	1	1	4	3	27.57	3	0
42680	4.21	0.406	1.2	5.09	74.8	0.81	0.054	0.256	0.398	0.23	1.31	0.2	1	0	0	0	1	39	3	2	1	3	1	1	26.47	3	0
42685	0.64	0.191	0.282	3.68	73.7	1.6	0.218	0.298	0.427	4.66	3.14	0.36	1	0	0	0	1	23	1	1	2	2	4	1	34.24	1	0
42693	1.32	0.406	0.583	5.55	74.1	0.7	0.054	0.307	0.399	0.37	1.8	1.11	1	0	0	0	2	49	1	1	1	1	3	1	23.8	3	0
42696	0.62	0.15	0.265	3.26	43.5	0.49	0.035	0.171	0.038	0.14	1.46	1.98	1	0	1	0	2	78	2	1	1	2	3	1	28.82	2	0
42715	1.42	0.462	0.601	10.3	70.3	0.92	0.086	0.31	0.193	0.36	2.23	1	1	0	0	0	1	51	1	1	1	1	3	2	37.6	2	0
42724	0.48	0.11	0.186	2.37	43.4	0.32	0.045	0.098	0.463	0.14	0.36	0.76	1	0	0	0	1	32	1	2	3	1	3	2	20.14	3	0
42727	8.28	0.078	0.723	6.93	121	2	0.087	0.236	0.484	0.64	0.87	0.59	1	0	0	0	1	26	2	1	2	2	2	2	21.71	1	0
42743	0.73	0.247	0.161	3.34	60.2	0.52	0.023	0.289	0.027	0.2	1.8	1.15	1	0	0	0	1	34	3	1	1	3	2	1	30.81	3	0
42746	0.62	0.17	0.161	2.72	18.8	0.32	0.023	0.054	0.168	0.4	3	0.8	0	0	0	0	3	69	1	2	1	1	3	1	21.22	3	0
42770	0.42	0.136	0.392	6.81	32	2.75	0.055	0.189	0.015	0.14	2.8	4.26	1	0	0	0	2	24	2	1	2	3	2	1	24.68	3	0
42779	1.11	0.094	0.366	6.22	38.7	1.82	0.069	0.175	0.048	0.2	2.8	1.03	1	0	0	0	1	35	3	1	1	2	1	1	25.02	2	0
42785	0.7	0.03	0.184	1.69	33.8	0.13	0.023	0.067	0.049	0.78	0.72	0.2	1	0	0	0	1	22	1	2	1	2	2	2	27.71	1	0
42788	4.82	0.258	0.495	7.72	21.6	1.86	0.036	0.167	0.132	0.55	4.28	0.88	1	0	1	1	1	71	1	2	1	1	3	1	34.06	2	0
42794	0.4	0.067	0.049	0.497	0.65	0.3	0.023	0.011	0.049	1.04	4.59	0.2	1	0	0	0	1	26	2	1	2	1	3	1	24.46	1	0
42797	1.54	0.972	0.429	8.32	105	0.8	0.043	0.275	0.127	0.2	1.48	1.6	1	0	0	0	2	35	1	2	1	2	3	1	26.59	3	0
42811	3.19	0.064	0.458	3.95	82.6	0.4	0.068	0.113	0.075	0.14	1.1	0.2	1	0	0	0	1	27	1	1	3	1	3	2	26.07	3	0
42814	0.75	0.266	0.123	2.4	19.2	0.38	0.068	0.189	0.029	0.61	2.7	0.6	1	1	0	1	3	80	2	2	2	2	4	3	32.31	3	0
42817	0.41	0.367	0.301	10.5	57.3	0.57	0.035	0.298	0.145	0.26	1.18	0.74	1	0	1	1	3	51	2	1	1	1	1	3	26.13	2	0
42825	1.04	0.648	0.287	6.13	150	5.54	0.085	0.222	0.235	0.14	9.96	1.05	1	0	0	1	1	61	2	1	1	2	3	2	28.01	2	0
42834	3.48	0.314	0.503	5.42	102	0.75	0.092	0.205	0.232	0.14	1.22	1.93	1	0	0	0	1	45	1	1	1	1	3	2	37.05	3	0
42840	0.82	0.086	0.062	0.865	7.46	0.17	0.023	0.033	0.091	0.29	1.1	0.2	1	0	0	0	1	45	1	2	1	2	2	2	31.99	1	1
42844	23.3	0.113	0.432	3.84	8.07	0.36	0.032	0.161	0.015	0.38	2.4	5.43	0	0	0	1	1	63	1	2	1	1	3	2	27.58	2	0
42846	0.56	0.168	0.312	3.14	47.3	0.37	0.023	0.181	0.043	0.4	1.2	1.21	1	0	0	0	1	32	1	2	1	2	4	1	27.51	3	0
42847	0.34	0.243	0.19	3.79	61.4	0.69	0.096	0.179	0.067	0.29	1.5	2.6	1	0	0	0	1	22	3	1	1	3	2	1	23.21	3	0
42850	1.26	0.147	0.087	0.927	6.34	0.1	0.023	0.011	0.045	0.79	1.84	0.66	1	0	1	0	3	53	3	1	1	1	3	2	25.65	1	0
42855	3.15	0.381	1.34	6.92	424	0.7	0.054	0.171	0.307	0.48	1.2	1.72	1	0	0	0	2	36	1	2	1	1	5	2	25.9	3	0
42866	1.91	0.782	1.36	5.16	76.8	1.65	0.162	0.108	0.133	0.43	2.22	2.69	0	0	0	1	3	80	3	2	1	2	3	2	38.47	3	0
42880	1.14	0.03	0.472	4.32	28.6	0.18	0.023	0.146	0.058	0.29	0.69	0.2	1	0	0	0	1	28	1	2	1	2	3	1	22.09	2	0
42896	2.96	0.067	0.578	3.69	31.6	1.58	0.023	0.183	0.106	0.27	2.81	0.59	1	0	0	0	1	26	2	2	3	2	1	1	25.78	3	0
42901	0.98	0.094	0.283	4.92	25.6	0.25	0.043	0.142	0.073	0.14	0.87	1.17	1	0	1	1	3	33	1	1	1	1	4	1	44.23	3	0
42906	3.33	0.885	0.386	16.2	55.4	0.93	0.061	0.371	0.035	0.6	2.67	0.83	1	0	0	0	1	56	1	1	1	1	3	3	29.15	2	0
42912	2.28	1.14	0.475	4.44	46.9	0.92	0.055	0.104	0.116	0.83	2.6	1.6	1	0	0	0	1	46	2	1	1	2	2	1	28.8	3	0
42918	0.5	0.209	0.201	2.83	14	0.47	0.023	0.09	0.015	0.28	1.7	1.14	1	0	0	1	3	60	3	2	1	3	1	2	32.54	3	0
42920	0.31	0.763	0.682	5.58	58.3	0.69	0.069	0.098	0.125	0.54	1.08	0.2	1	1	0	1	3	80	1	1	1	2	3	3	24.34	3	0
42940	1.03	0.746	0.13	5.26	29.7	0.83	0.023	0.087	0.073	1.3	2.1	1.09	1	0	0	0	1	71	3	2	2	3	3	1	25.02	1	1
42949	1.05	0.105	0.249	1.46	34.7	0.22	0.049	0.051	0.064	0.53	1.5	1.62	1	0	0	0	1	60	1	2	1	1	3	2	28.68	3	0
42953	0.7	0.053	0.269	1.69	11.9	0.3	0.023	0.124	0.106	0.31	0.5	0.2	1	0	0	0	1	31	1	2	2	1	3	1	24.43	3	0
42974	1.16	0.432	0.214	2.65	12.8	0.53	0.047	0.122	0.015	1.61	2.38	0.41	1	1	0	1	2	37	3	1	1	3	3	2	30.12	2	0
42978	0.46	0.685	0.472	8.2	129	1.33	0.115	0.223	0.154	0.27	2.2	0.61	0	1	0	1	3	79	3	1	1	2	3	3	26.35	3	0
42985	3.04	0.418	0.422	5.18	26.9	1.12	0.038	0.074	0.14	0.31	2	0.2	1	0	1	1	3	63	3	1	1	3	3	3	25.75	2	0
42987	0.29	0.046	0.263	2.68	49.9	0.11	0.023	0.077	0.051	0.3	0.66	5.99	1	0	0	1	1	61	1	2	1	1	3	2	32.38	2	0
43007	0.79	0.067	0.162	1.79	24.5	0.13	0.023	0.057	0.049	0.14	1.09	5.77	1	0	0	0	1	47	1	1	1	1	5	1	23.74	3	0
43018	0.46	0.163	0.164	1.76	17.7	1.18	0.023	0.042	0.015	0.36	4.9	1.73	1	0	0	1	3	68	3	2	2	3	1	1	35	3	0
43024	3.45	0.786	0.468	6.08	56.4	1.68	0.112	0.336	0.167	2.72	1.77	3.39	1	0	0	1	1	50	1	2	1	1	2	1	30.56	1	1
43025	1.82	0.696	0.269	3.47	61.1	0.87	0.071	0.104	0.049	0.79	3.5	0.98	1	0	0	1	1	80	1	2	2	3	3	3	25.11	2	0
43031	1.74	0.197	0.219	0.595	10.1	0.07	0.023	0.033	0.026	3.05	2.27	1.43	1	0	0	0	1	80	3	2	2	1	1	3	19.5	3	0
43036	1.28	0.14	0.338	4.14	22.4	0.42	0.023	0.366	0.055	0.25	1.5	4.3	1	0	1	1	3	56	1	2	2	2	4	3	64.8	3	0
43037	1.69	0.242	1.22	6.87	86.9	0.51	0.15	0.209	0.054	0.3	0.67	0.2	1	0	0	0	1	28	2	2	2	3	4	3	32.55	3	1
43060	5.7	0.19	0.552	8.35	150	0.84	0.063	0.271	0.166	0.87	1.63	0.97	1	0	0	0	1	39	1	1	2	1	3	1	25.28	3	1
43062	2.09	0.15	0.332	3.19	79.1	0.56	0.036	0.111	0.331	0.14	2.06	0.35	1	0	0	0	1	44	1	1	1	1	3	1	25.9	3	0
43067	0.73	0.167	0.24	4.54	32.3	0.33	0.038	0.14	0.025	0.26	0.73	1.09	1	0	0	0	1	30	1	2	2	1	1	2	27.73	2	0
43071	0.39	0.098	0.162	3.78	67.8	0.55	0.06	0.119	0.084	0.14	1.61	0.91	1	0	0	0	1	40	3	1	3	2	2	1	29.64	3	0
43079	1.06	0.214	0.464	4.93	89.4	0.33	0.172	0.086	0.248	0.36	1.3	0.81	1	0	1	0	2	68	1	1	2	1	3	1	27.28	3	0
43087	2.46	0.352	1.1	15.1	177	0.85	0.102	0.322	0.557	0.23	0.65	4.17	1	0	0	0	1	39	1	2	1	1	5	1	27.45	3	0
43095	0.61	0.055	0.137	2.98	9.63	0.24	0.038	0.109	0.043	0.45	0.76	3.22	1	0	0	0	1	33	1	1	3	1	1	1	26.31	1	0
43096	3.15	0.119	0.503	11.1	97.8	1.5	0.187	0.296	0.24	0.27	2.06	9.74	1	0	0	0	1	50	1	1	1	1	3	1	24.66	2	0
43154	1.07	0.142	0.134	4.25	20	0.49	0.076	0.109	0.052	0.38	1.31	0.71	1	0	0	1	1	52	3	2	2	3	2	3	22.69	1	0
43167	1.35	0.062	0.276	5.45	31.3	0.28	0.023	0.256	0.1	0.29	0.74	3.18	1	0	0	0	1	38	1	2	1	2	3	1	22.57	3	0
43168	1.3	0.506	0.269	9.85	56	0.8	0.114	0.266	0.077	0.35	1.2	0.78	1	0	1	1	2	78	3	1	1	2	1	3	30.78	2	0
43169	3.3	1.02	0.299	8.13	144	1.64	0.042	0.189	0.257	1.81	2.67	1.65	1	0	0	0	1	52	1	1	1	1	3	3	22.6	1	0
43175	9.67	0.299	0.708	14.9	20.9	1.89	0.114	0.387	0.082	0.21	1.6	0.75	1	0	0	0	1	39	3	1	1	2	1	1	27.75	3	0
43177	1.93	0.084	0.158	2.02	34.2	0.15	0.023	0.101	0.021	0.14	0.75	0.87	1	0	0	0	3	36	1	1	1	2	3	1	26.45	2	0
43185	0.63	0.079	0.13	2.39	21.7	0.38	0.038	0.057	0.132	0.14	2.02	0.64	1	0	0	0	1	77	1	1	2	1	3	3	20.59	2	0
43189	1.42	0.182	0.199	6.54	34.8	0.62	0.41	0.293	0.592	0.14	2.24	6.12	1	0	0	1	1	48	1	1	3	1	3	3	28.6	2	0
43215	1.67	0.417	1.93	4.93	60.8	0.58	0.059	0.22	0.12	1.05	1.33	0.45	1	0	0	0	1	31	3	2	3	2	4	1	35.1	1	0
43216	4.34	0.37	0.683	5.45	164	1.19	0.023	0.23	0.091	0.47	3.4	4.28	1	0	0	0	2	48	2	1	1	2	2	3	24.94	1	0
43221	2.27	0.342	0.238	7.74	43.6	0.71	0.085	0.117	0.043	0.72	1.96	0.2	1	0	0	0	2	34	3	1	1	3	3	2	24.85	1	0
43224	22.5	0.88	0.96	7.98	71.5	0.69	0.076	0.231	0.298	0.24	0.57	0.56	1	0	0	0	3	42	1	2	1	1	3	3	33.41	3	1
43229	1.02	1.39	0.447	3.42	16.6	0.96	0.091	0.1	0.09	0.97	2.7	0.88	1	0	0	1	1	53	1	1	1	2	5	1	28.27	1	0
43232	4.03	0.254	0.331	9.46	63.8	0.52	0.076	0.536	0.139	0.14	1.11	0.72	1	0	0	0	2	46	1	1	1	1	3	1	25.65	3	0
43237	1.99	0.504	0.423	5.15	108	0.87	0.092	0.111	0.138	0.46	2.2	1.06	1	0	0	1	1	68	2	1	3	2	3	2	23.35	2	0
43240	0.32	1.38	0.218	2.94	81.6	0.52	0.067	0.151	0.107	1	1.5	2.16	1	0	0	1	3	72	3	2	2	1	2	1	32.79	2	0
43247	0.47	0.136	0.115	2.25	9.3	0.35	0.023	0.082	0.029	0.57	2.06	0.52	1	0	0	0	2	52	2	1	3	3	1	2	21.06	3	0
43263	0.49	0.073	0.063	0.813	29.5	0.12	0.032	0.043	0.084	0.28	0.45	1.19	1	0	0	0	1	27	1	2	2	2	2	3	19.66	3	0
43271	1.61	0.831	0.345	6.8	72.9	1.3	0.159	0.189	0.053	0.29	1.4	0.35	1	1	0	1	1	53	1	2	2	3	3	2	46.09	2	1
43277	1.93	0.053	0.448	3.21	142	0.68	0.068	0.112	0.099	0.21	1.65	0.63	1	0	0	0	1	28	1	1	1	1	3	1	22.64	2	0
43302	2.7	0.282	0.336	2.57	35.4	0.34	0.023	0.063	0.063	0.35	0.94	0.2	1	1	1	1	2	68	2	2	1	2	3	3	39.98	2	1
43311	1.04	0.659	1.05	8.02	42.8	0.86	0.275	0.32	0.064	0.2	1.76	1.34	1	0	0	0	3	47	1	1	1	2	1	3	24.56	3	0
43340	1.93	0.135	0.427	3.66	19.3	0.4	0.039	0.091	0.077	0.21	0.68	1.39	1	0	0	0	1	34	2	2	1	2	2	3	20.61	3	0
43347	0.28	0.597	0.26	8.55	133	1.07	0.093	0.225	0.298	0.26	1.46	0.2	1	0	0	0	1	37	1	2	1	1	4	3	35.63	3	0
43349	3.12	0.05	0.9	5.45	35.1	0.42	0.053	0.156	0.036	0.26	0.8	0.67	1	0	0	0	1	26	1	2	3	1	2	1	45.65	3	0
43353	0.87	1.19	0.246	6.51	72.2	0.44	0.113	0.131	0.239	0.65	1.2	1.05	0	0	0	1	1	71	2	2	1	2	3	2	17.52	2	0
43356	1.02	0.196	0.525	2.88	16.4	0.26	0.048	0.123	0.049	0.38	0.88	1.66	1	0	0	0	1	34	2	2	3	1	4	2	25.28	3	0
43363	0.61	0.03	0.356	3.41	37.8	0.18	0.046	0.089	0.068	0.14	0.4	0.41	1	0	0	0	3	23	3	2	1	2	3	1	25.86	3	0
43378	1.9	0.435	0.909	43.8	119	2.15	0.132	0.28	0.253	0.31	2.1	0.7	1	0	0	0	3	24	3	2	3	3	1	2	32.5	3	0
43381	1.86	0.144	0.345	6.12	68.1	0.19	0.246	0.244	0.063	0.14	0.56	0.2	1	0	0	0	1	28	1	1	1	1	3	1	31.05	2	0
43383	2.07	1.57	0.391	6.43	43.1	0.4	0.119	0.177	0.051	0.39	0.91	1.93	1	0	0	1	1	60	1	2	1	1	3	2	27.6	3	0
43386	0.95	0.575	0.368	6.45	139	1.42	0.061	0.101	0.367	0.32	1.75	0.63	0	1	0	1	2	80	1	1	1	2	4	2	20.51	2	0
43404	0.65	0.525	0.137	3.56	37.5	0.38	0.044	0.129	0.189	0.83	0.74	2.79	1	0	0	0	1	40	1	2	2	2	3	3	20.68	1	0
43420	4.45	0.439	1.26	6.41	95	1.55	0.154	0.257	0.692	0.29	1.6	0.49	1	0	0	0	3	46	1	2	2	2	4	3	50.79	3	0
43433	0.42	0.129	0.222	2.78	33.8	1.22	0.023	0.644	0.079	0.29	2.9	6.45	1	0	0	1	1	55	1	2	2	1	3	1	21.77	3	0
43449	3.14	0.093	0.517	6.99	44.7	3.31	0.098	0.123	0.122	0.14	6.2	0.94	1	0	0	1	2	39	1	1	1	2	3	1	39.01	2	0
43451	0.88	0.153	0.143	2.57	10.2	0.34	0.023	0.113	0.021	0.43	2.38	13.5	1	0	0	0	1	36	1	1	2	1	3	1	27.09	1	0
43452	1.43	0.316	0.238	3.16	28.1	0.72	0.023	0.097	0.05	0.39	3.86	1.74	1	0	1	1	1	80	3	2	2	2	4	3	29.12	2	0
43453	1.1	0.119	0.334	3.75	42.4	0.45	0.047	0.168	0.076	0.14	1.38	0.91	1	0	0	0	3	40	3	1	1	3	1	1	37.7	3	0
43455	3.15	0.239	0.562	6.97	39	0.97	0.059	0.435	0.053	0.38	1.7	7.84	1	0	0	0	3	25	1	1	1	1	5	1	28.23	3	1
43458	3.32	0.631	0.428	5.16	79.1	0.77	0.077	0.187	0.048	0.27	1.2	0.2	1	0	0	1	3	62	3	2	1	1	1	3	27.58	3	0
43465	2.06	0.663	0.23	2.58	57.7	1.34	0.055	0.189	0.245	0.31	3	0.96	1	0	0	1	1	49	3	2	1	2	4	3	23.31	3	0
43466	4.1	0.31	1.03	5.72	131	0.57	0.073	0.243	0.142	0.23	1.11	0.34	1	0	0	0	3	47	1	2	1	1	3	1	29.94	3	0
43469	1.94	0.145	0.448	3.33	61.7	0.86	0.068	0.13	0.265	0.23	2.5	0.44	1	0	0	0	3	78	2	1	1	2	3	3	29.49	3	0
43476	0.31	0.186	0.116	2.5	16.9	0.32	0.038	0.084	0.13	0.32	1.74	0.76	1	0	0	0	1	50	2	1	1	1	3	1	23.96	2	0
43486	0.49	0.307	0.237	4.16	43.5	0.53	0.126	0.252	0.065	2.9	1.6	1.32	1	0	0	0	1	39	2	1	2	2	5	1	27.03	1	0
43488	12.6	0.456	1.41	4.79	72.1	1.06	0.321	0.253	0.065	0.25	1.1	1.16	1	0	0	0	1	29	2	2	2	3	1	2	30.86	3	0
43492	1.6	0.957	0.427	8.99	48.7	0.69	0.14	0.284	0.128	0.32	0.75	0.93	1	0	0	0	1	51	1	2	2	1	3	2	25.39	2	0
43493	0.61	0.08	0.103	2.86	8.02	0.32	0.023	0.063	0.033	0.14	2.15	1.07	1	0	0	0	3	60	3	2	1	3	1	3	41.75	3	0
43546	0.43	0.521	0.299	6.79	48	0.52	0.094	0.158	0.1	0.29	1.8	1.35	1	0	0	1	1	72	1	2	2	2	4	3	23.88	3	0
43548	4.06	0.154	0.6	2.37	116	0.38	0.069	0.091	0.301	0.43	0.7	0.76	1	0	0	1	3	26	1	2	1	1	3	3	28.79	1	0
43553	1.94	0.298	0.347	7.57	103	0.31	0.108	0.293	0.103	0.32	0.55	0.93	1	0	0	0	1	24	1	2	3	2	4	1	56.54	3	0
43555	0.51	0.184	0.484	5.56	249	0.76	0.07	0.196	0.275	0.22	0.9	1.16	1	0	0	1	1	31	3	1	3	3	1	1	48.21	3	0
43558	0.71	1.37	0.481	5.24	148	0.31	0.042	0.214	0.094	1.14	2.57	4.07	1	1	1	1	1	69	1	1	3	1	3	3	24.15	2	0
43568	0.64	0.842	0.175	2.58	34.8	1.01	0.287	0.137	0.078	0.88	2.99	1.28	1	0	0	1	1	49	3	1	1	3	4	1	22.95	1	0
43571	0.85	0.03	0.325	2.46	39.9	0.23	0.023	0.122	0.065	0.14	0.77	1.95	1	0	0	0	1	24	1	1	2	1	3	1	20.25	2	0
43575	3.69	0.427	1.86	4.77	76.6	1.49	0.046	0.197	0.028	0.62	1	0.2	1	0	1	0	1	47	2	2	1	2	4	1	50.82	2	0
43582	9.35	0.555	0.5	3.46	42.2	0.92	0.047	0.125	0.032	0.62	3.1	4.36	1	0	0	1	1	46	1	1	3	2	2	1	30.98	3	0
43583	0.39	0.03	0.124	0.892	35.1	0.12	0.056	0.035	0.313	0.3	1.1	2.26	1	0	0	0	1	24	1	2	2	2	4	2	28.79	1	0
43612	1.99	0.667	0.261	4.12	24.3	0.52	0.072	0.35	0.063	0.53	1.8	1.29	1	0	1	1	1	56	3	2	1	2	4	1	26.88	1	0
43636	2.88	0.03	0.092	1.13	11.3	0.07	0.023	0.011	0.015	0.14	1.24	0.77	1	0	0	0	2	38	1	1	1	1	3	1	23.57	3	0
43641	0.85	0.083	0.229	2.37	18.7	0.26	0.04	0.077	0.047	0.14	1	0.94	1	0	0	0	3	20	2	2	2	3	3	2	33.85	3	0
43647	3.18	1.67	0.472	6.89	114	0.45	0.11	0.397	0.365	0.32	0.31	0.97	1	0	0	0	1	31	1	2	1	1	2	2	45.19	3	0
43654	3.24	0.555	0.532	2.57	25.2	0.63	0.112	0.091	0.127	1.3	1.8	0.2	1	0	0	0	1	36	2	1	1	3	3	1	19.01	1	1
43674	0.08	0.583	0.168	2.28	20.2	0.62	0.056	0.156	0.024	0.51	2.3	0.2	0	1	0	1	3	57	3	2	2	1	4	3	38.93	3	0
43678	1.22	0.262	0.183	2.96	34.8	0.16	0.063	0.155	0.065	0.27	0.96	0.36	1	0	0	1	1	43	1	1	1	2	3	2	38.85	3	0
43680	1.36	0.64	0.355	6.91	21.2	0.57	0.064	0.15	0.134	0.3	0.71	7.98	1	0	0	0	1	57	1	2	1	1	2	1	31.17	3	0
43682	3.81	0.513	0.601	3.4	70.5	1.04	0.05	0.07	0.137	0.4	2.21	0.41	1	0	1	1	1	80	2	2	2	2	3	3	29.83	2	0
43691	2.17	0.245	0.517	8.72	75.6	0.51	0.058	0.178	0.067	0.14	0.78	0.95	1	0	0	0	1	44	3	2	2	3	3	3	20.77	3	1
43709	0.2	0.174	0.113	0.756	12.3	0.15	0.023	0.031	0.028	0.48	1.3	0.2	1	1	0	1	1	51	3	1	1	2	1	2	34.52	2	0
43726	0.31	0.73	0.199	3.37	45.6	0.6	0.06	0.118	0.144	0.54	2.4	0.39	1	1	1	1	3	76	1	2	1	1	4	3	30.46	3	0
43727	1.59	1.48	1.42	7.56	16.9	0.45	0.023	0.377	0.024	0.81	1.25	0.2	1	0	0	0	3	46	3	2	1	3	2	3	33.1	3	0
43738	0.74	0.581	0.075	3.69	9.79	0.6	0.023	0.081	0.015	1.24	6.25	31.4	1	0	1	0	1	80	3	1	1	2	3	2	23.2	3	0
43742	0.7	0.348	0.511	8.51	80.6	0.76	0.266	0.236	0.5	0.39	0.76	0.46	1	0	1	0	3	36	3	2	2	3	1	2	46.62	3	0
43747	0.88	0.454	0.527	6.65	53.4	0.63	0.088	0.254	0.059	0.14	0.83	1.21	1	0	0	0	1	29	3	1	1	2	1	1	42.95	3	0
43748	1.35	0.959	0.435	5.6	48.3	0.29	0.102	0.092	0.082	0.57	0.89	0.2	0	1	1	1	3	80	3	2	2	2	3	2	30.43	3	0
43749	0.47	0.419	0.332	2.84	12.1	0.73	0.023	0.055	0.037	1.3	3.6	0.7	1	0	0	0	1	63	2	1	1	2	2	3	21.04	1	1
43757	0.44	0.359	0.309	7.47	83.9	0.59	0.046	0.198	0.087	0.21	0.86	0.2	1	0	1	0	3	62	3	2	1	3	1	2	29.92	3	1
43764	6.39	0.969	0.588	9.59	104	0.74	0.114	0.451	0.202	0.26	0.47	1.27	0	0	1	1	1	36	2	2	1	2	4	3	36.79	3	0
43769	0.33	0.821	0.241	2.98	31.8	1.25	0.041	0.099	0.237	1.6	8.1	0.81	1	1	0	1	1	80	3	2	2	2	3	2	27.02	2	0
43772	0.74	0.318	0.112	3.06	21	0.12	0.023	0.118	0.038	0.81	0.71	0.75	1	0	0	1	3	58	2	2	2	2	3	1	29.02	3	0
43773	0.58	1.19	0.642	10.3	73.5	0.75	0.114	0.287	0.378	0.74	1	3.57	1	1	0	1	2	80	1	1	2	1	3	2	22.92	2	0
43775	4.2	0.226	0.585	9.02	126	0.81	0.064	0.15	0.255	0.14	0.9	0.2	1	0	1	0	3	50	1	2	3	1	1	2	35.58	3	0
43790	4.39	0.351	1.46	8.73	67.2	0.54	0.069	0.168	0.115	0.45	0.93	0.66	1	0	0	0	1	36	2	2	2	1	3	1	23.47	3	0
43792	1.93	0.758	0.512	7.42	83.6	1.16	0.068	0.211	0.295	0.4	1.9	1.01	1	0	1	0	2	75	1	1	1	1	3	2	30.33	2	0
43801	4.31	0.594	0.363	4.45	24.7	0.45	0.023	0.216	0.084	0.4	1.26	0.75	1	0	0	0	2	72	1	1	2	1	3	2	29.81	2	0
43810	5.58	0.126	0.442	4.67	78.7	0.41	0.05	0.246	0.062	0.9	1.91	3.27	1	0	0	0	1	21	2	1	2	1	3	2	22.89	1	0
43822	1.37	0.516	0.201	2.95	12	0.91	0.058	0.041	0.788	0.86	2.33	0.2	1	0	1	1	2	49	1	2	2	1	3	3	31.01	1	1
43830	8.35	1.28	0.899	9.04	62.2	9.54	0.063	0.321	0.275	1.34	7.02	1.45	1	0	1	0	1	44	1	2	1	1	1	3	34.2	1	0
43833	0.72	0.174	0.327	3.98	57.2	0.53	0.07	0.152	0.114	0.31	1.3	0.2	1	0	0	0	3	77	1	1	1	1	3	3	36.37	3	0
43847	0.9	0.366	0.39	6.24	91.8	1	0.049	0.206	0.174	0.39	1.29	1.15	1	0	1	1	1	65	3	2	2	2	1	3	33.47	2	0
43853	0.87	0.455	0.32	5.56	45.2	0.64	0.06	0.202	0.101	0.45	2	1.13	1	0	1	1	2	77	3	1	1	2	2	3	29.09	2	0
43857	1.23	0.539	0.748	4.74	52.9	0.53	0.251	0.107	0.106	0.68	2.4	0.62	1	0	0	1	1	48	3	2	3	2	1	3	33.11	1	1
43859	1.54	0.241	0.482	7.62	25.6	0.87	1.13	0.162	0.015	0.51	2.1	1.12	0	0	1	0	2	79	3	1	1	3	3	2	33.46	2	0
43867	3.71	0.345	0.348	4.19	62.2	0.68	0.059	0.121	0.077	0.14	2	0.2	1	0	1	0	1	63	2	1	1	2	3	3	27.14	3	0
43868	0.22	0.155	0.25	6.2	194	0.53	0.046	0.228	0.109	1.8	0.89	0.82	1	0	0	0	1	26	3	2	2	2	2	1	34.87	1	1
43889	1.11	0.109	0.363	3.85	148	0.19	0.036	0.12	0.247	0.14	0.53	0.79	1	0	0	1	2	27	2	1	3	2	3	2	40.49	3	0
43892	1	0.412	0.268	6.38	64.6	1.44	0.113	0.3	0.039	1.39	2.75	0.83	1	0	0	0	1	35	3	1	1	2	1	1	33.79	1	0
43899	2.46	0.192	0.277	2.75	13.7	1	0.09	0.078	0.058	1.24	2.19	0.5	1	0	0	0	1	35	2	1	1	1	3	1	21.04	1	0
43902	0.56	0.063	0.674	4.03	62.8	0.28	0.023	0.233	0.045	0.39	1	1.21	1	0	0	0	1	41	1	2	1	3	3	1	19.58	2	0
43909	0.74	0.03	0.177	5.57	17.3	1.03	0.023	0.283	0.039	0.14	2.06	19.2	1	0	0	1	2	36	1	1	1	3	5	2	30.53	1	0
43911	0.38	1.61	0.366	13	84.5	0.6	0.098	0.322	0.291	1.04	2.34	0.51	1	0	0	1	1	60	1	1	2	3	3	1	28.58	1	0
43916	0.42	0.688	0.271	4.44	10	0.28	0.023	0.118	0.015	1.83	1.89	0.53	1	0	0	0	3	55	3	2	1	2	3	3	24.31	1	0
43920	2.92	0.355	0.654	8.01	177	1.05	0.159	0.175	0.426	0.21	0.8	1.54	1	0	0	1	1	43	1	2	2	1	4	1	27.12	3	0
43932	0.5	0.357	0.38	6.72	65.5	0.68	0.206	0.251	0.199	1.75	0.99	0.41	1	0	0	0	1	27	2	1	3	2	4	1	34.37	3	0
43942	1.29	0.323	0.188	3.04	17.5	0.54	0.074	0.051	0.028	0.75	2.63	1.08	1	0	0	0	3	62	1	1	1	1	3	2	31.22	1	0
43945	0.95	0.304	0.279	4.37	55.9	1.57	0.136	0.142	0.127	0.21	4.38	0.47	1	1	0	1	2	70	2	1	1	2	3	2	31.12	3	0
43960	0.71	0.208	0.247	3.64	32.4	0.89	0.049	0.093	0.021	0.14	2.6	3.75	1	0	0	0	1	43	2	1	1	2	1	1	33.66	3	0
43963	0.27	0.057	0.132	3.17	39.2	0.2	0.023	0.082	0.112	0.14	0.91	2.78	1	0	0	0	1	31	1	1	1	1	3	1	29.28	3	0
43981	7.33	0.614	0.547	2.5	47	1.05	0.094	0.06	0.194	2.73	1.94	0.81	1	0	0	1	1	45	3	2	2	3	3	2	28.96	1	0
43991	1.8	0.948	0.316	11.3	66.5	0.68	0.164	0.258	0.015	0.29	0.67	1.59	1	0	0	0	1	61	3	2	2	2	2	3	41.43	3	0
43995	0.14	0.09	0.096	2.7	15.7	0.27	0.023	0.049	0.023	0.31	2.39	0.4	1	0	1	1	2	80	3	2	1	2	3	3	30.54	3	0
44001	0.4	0.063	0.054	1.3	8.56	0.29	0.023	0.057	0.032	0.49	2.15	1.53	1	0	0	0	1	49	1	2	1	1	4	3	28.91	3	0
44008	0.52	0.109	0.213	2.53	55.7	0.65	0.062	0.061	0.119	0.14	0.66	0.36	1	0	0	0	1	39	1	1	1	2	2	2	38.51	3	0
44010	0.27	0.21	4.63	5.1	38.9	0.73	0.036	0.076	0.071	0.26	1.9	0.45	1	0	1	1	3	72	3	2	1	2	1	3	33.93	3	0
44012	1.16	0.706	0.545	4.83	45.8	0.93	0.134	0.105	0.294	0.42	1.93	1.11	1	0	0	0	2	48	2	2	1	2	3	3	35.13	2	0
44051	1.4	0.485	0.337	6.67	98.7	0.19	0.093	0.218	0.101	0.24	0.83	1.94	1	0	0	0	2	32	3	1	1	1	3	2	23.98	3	0
44057	0.67	0.058	0.131	0.861	6.71	0.15	0.023	0.029	0.174	1.87	1.49	6.78	1	0	0	0	1	22	1	2	3	1	3	1	21.59	1	0
44058	1.82	0.563	0.712	4.57	147	0.79	0.133	0.275	0.26	0.29	0.69	0.35	1	0	0	0	3	38	1	2	2	2	4	3	28.8	3	0
44060	0.84	0.144	0.178	5.76	51	0.4	0.036	0.234	0.451	0.26	1.38	3.98	1	0	0	1	1	69	1	2	2	1	3	2	25.3	3	0
44063	2.08	0.187	0.291	5.03	9.45	0.12	0.033	0.056	0.015	0.54	1.6	1.39	1	0	0	0	2	40	2	2	2	1	3	3	32.59	2	1
44064	4.6	0.127	0.549	5.71	113	0.64	0.205	0.166	0.079	0.27	1.22	1.91	1	0	0	0	1	27	2	2	2	3	1	2	24.29	3	0
44068	2.67	0.446	0.367	3.8	83	0.47	0.06	0.076	0.391	0.43	0.63	0.81	1	0	1	1	1	60	2	2	1	1	1	3	31.47	3	0
44071	4.49	0.39	0.722	9.7	69.9	0.54	0.023	0.261	0.075	0.45	1.05	0.75	0	0	0	1	1	43	1	2	1	1	3	2	33.87	3	0
44072	0.91	0.145	0.223	2.4	33.9	0.71	0.023	0.094	0.067	0.36	3.7	5.77	1	0	0	1	1	54	1	2	1	1	4	2	22.25	3	0
44073	0.3	0.771	0.214	6.47	40.4	0.36	0.044	0.116	0.083	1.29	1.88	0.66	0	0	0	1	3	34	2	1	2	1	3	1	28.77	1	0
44081	4.88	0.264	1.58	8.69	85.3	0.59	0.088	0.302	0.232	0.33	0.75	0.2	1	0	0	0	1	25	2	2	1	2	3	3	20.75	2	0
44082	3.43	0.509	0.709	11.8	157	1.98	0.107	0.164	0.392	0.14	2.2	0.98	1	0	0	0	2	80	1	1	1	2	3	2	31.69	3	0
44090	2.41	0.63	0.492	7.6	108	0.95	0.058	0.182	0.276	0.45	1.44	1.32	1	0	0	1	1	66	3	2	2	3	3	3	35.09	2	0
44091	5.61	0.538	1.5	4.24	72.2	1.25	0.085	0.109	0.015	0.95	2.5	0.97	1	0	0	0	3	49	3	2	2	3	2	3	29.89	3	0
44092	0.35	0.349	0.133	3.46	15.8	0.21	0.049	0.051	0.065	1.8	2.2	0.4	1	0	0	1	2	47	3	1	1	2	3	1	24.41	1	0
44093	2.51	0.475	0.442	3.64	51.9	0.64	0.081	0.159	0.14	0.78	1.44	0.7	1	0	0	1	1	36	1	2	2	2	3	3	39	1	0
44110	0.75	0.07	0.431	2.14	14.2	0.23	0.036	0.05	0.015	0.49	1.4	0.2	1	0	0	1	3	33	1	2	2	2	3	2	36.43	1	0
44117	0.43	0.237	0.115	4.22	28.6	0.24	0.052	0.12	0.025	0.35	0.96	0.37	1	0	0	1	3	67	3	2	2	2	4	3	24.19	3	0
44121	1.72	0.202	0.232	3.05	27.6	0.74	0.118	0.104	0.12	1.12	1.8	1.85	1	0	0	0	1	33	2	1	2	3	3	3	28.97	1	0
44124	2.38	0.566	1.37	10.4	101	0.78	0.148	0.145	0.164	0.43	0.92	0.95	1	0	0	0	2	37	1	2	1	1	3	3	22.44	2	0
44126	4.13	0.787	0.468	7.72	40.8	0.91	0.066	0.218	0.063	1.6	2.5	6.67	1	0	0	0	1	60	1	1	3	1	3	3	31.87	1	0
44128	0.96	0.515	0.569	6.97	90	0.58	0.084	0.33	0.06	0.14	1.07	3.3	1	0	0	0	3	29	3	2	2	2	4	3	21.68	3	1
44131	2.23	0.077	0.204	1.9	49.9	0.22	0.023	0.096	0.082	0.34	0.74	0.53	1	0	0	0	1	26	2	2	3	1	3	3	20.34	2	0
44148	1.4	0.294	0.903	7.36	87.6	0.62	0.05	0.403	0.2	0.3	0.92	0.88	1	0	0	0	1	32	2	2	2	1	1	2	37.21	3	0
44156	0.66	0.145	0.247	3.64	33.3	1.24	0.105	0.069	0.427	0.14	3.01	0.46	1	0	1	1	1	49	3	1	2	2	1	1	27.02	2	0
44160	0.63	0.3	0.211	4.93	49.6	0.3	0.038	0.113	0.113	0.14	0.76	1.41	1	0	0	0	3	33	3	2	1	3	1	2	35.86	3	0
44162	1.56	2.31	0.512	8.64	58	1.55	0.12	0.558	0.159	1.06	2.48	1.48	1	0	0	0	1	72	1	2	1	2	3	3	25.45	1	0
44163	2.43	1.5	0.444	4.1	49.6	0.73	0.6	0.142	0.233	1.28	1.09	1.23	1	0	0	0	1	45	3	2	2	2	3	3	21.02	1	0
44169	1.65	0.277	0.32	3.73	338	0.56	0.077	0.089	0.261	1	1.3	0.68	1	0	0	0	1	32	2	1	1	2	3	1	24.09	1	0
44171	1.8	0.397	0.781	6.13	118	0.54	0.094	0.343	0.071	0.28	0.71	1.38	1	0	0	0	1	27	1	2	1	2	3	2	26.89	3	0
44173	0.45	0.064	0.127	2.07	27.6	0.13	0.023	0.083	0.015	0.14	0.81	0.2	1	0	0	0	1	33	1	1	3	1	3	1	24.62	3	0
44177	0.38	0.137	0.239	4.9	53.4	0.18	0.061	0.169	0.065	0.24	0.55	2.67	1	0	0	0	3	26	1	2	2	2	4	2	27.05	3	0
44178	0.58	0.186	0.511	4.05	60	0.67	0.039	0.183	0.039	0.2	1.37	0.6	1	0	0	0	3	40	3	2	2	3	1	3	26.17	3	0
44180	8.39	1.96	0.351	16	104	3.44	0.147	0.762	0.087	0.62	4.7	5.21	1	0	0	0	1	45	1	1	1	2	2	1	35.53	3	0
44183	1.3	0.03	0.281	2.48	29.9	0.17	0.04	0.05	0.074	0.84	1	0.72	1	0	0	0	1	23	3	1	2	1	1	1	24.64	1	0
44187	1.2	0.584	0.522	6.83	153	1.35	0.102	0.207	0.287	0.87	2.55	0.74	1	0	0	0	1	46	3	1	1	2	3	1	33.02	1	0
44191	0.33	0.172	0.097	3.05	27.7	1.33	0.023	0.124	0.064	0.14	5.02	1.69	0	0	0	0	1	80	1	1	1	2	4	3	21.46	3	0
44194	0.82	0.229	0.564	5.07	94.5	1.59	0.075	0.136	0.215	0.4	2.18	3.04	1	0	0	0	1	36	3	1	1	2	1	1	31.14	1	0
44200	1.54	0.226	0.206	2.57	17.3	0.19	0.023	0.056	0.101	0.36	1.31	0.52	1	0	0	1	3	80	1	1	1	1	3	2	25.56	3	0
44205	2.02	0.105	0.169	1.65	22.5	0.22	0.049	0.034	0.032	0.14	0.56	0.76	1	0	0	0	1	32	1	2	1	1	4	2	19.04	3	0
44206	1.49	0.865	0.652	3.01	74.9	1.23	0.023	0.14	0.045	0.14	1.18	0.68	1	0	1	0	1	45	3	1	3	2	1	3	27.38	2	0
44209	2.76	0.951	0.28	10.7	90.5	0.53	0.05	0.281	0.087	1.59	2.6	7.77	1	0	0	1	1	59	1	1	2	2	5	3	31.11	1	0
44223	0.6	0.155	0.094	1.66	6.47	0.25	0.023	0.05	0.015	0.25	0.69	1.04	1	0	1	1	2	57	3	1	1	3	1	3	35.33	2	0
44238	1.09	0.354	0.24	19	31.9	2.01	0.06	0.47	0.07	0.32	3.97	10.5	1	0	0	0	1	61	1	1	1	2	3	2	30.08	2	0
44241	3.65	0.336	0.544	5.95	96.1	2.06	0.049	0.112	0.111	1.4	2.9	1.5	1	0	0	0	1	46	1	1	2	1	3	2	22.73	1	0
44243	2.03	0.239	0.344	8.98	31	0.61	0.138	0.292	0.088	0.14	1.18	3.37	1	1	0	0	2	60	1	1	1	1	1	2	33.8	2	0
44245	1.81	0.066	0.157	0.585	11.9	0.07	0.023	0.045	0.045	0.49	0.85	0.51	1	0	0	0	2	40	1	2	2	1	3	1	23.25	3	0
44255	1.43	0.146	0.401	1.32	22.7	0.43	0.098	0.022	0.015	0.4	1.46	0.5	1	0	0	1	1	60	1	2	2	1	3	1	30.94	3	0
44262	7.04	0.184	0.505	8.75	109	0.37	0.094	0.325	0.034	0.2	0.48	3.69	1	0	0	0	1	35	2	2	1	1	3	1	38.74	2	0
44267	1.74	0.092	0.399	4.17	64.5	4.82	0.023	0.152	0.064	0.21	10.9	1.87	1	0	0	0	1	37	3	1	1	2	1	1	29.99	3	0
44275	0.2	0.843	0.184	2.67	41.7	0.64	0.054	0.054	0.258	1.4	3.4	0.85	1	0	1	1	3	62	1	1	2	3	4	3	21.99	1	0
44285	0.82	0.03	0.611	5.4	75.4	0.47	0.055	0.169	0.07	0.23	1.02	2.75	1	0	0	1	3	55	2	1	2	2	4	3	30.95	3	1
44291	4.1	2.22	0.378	8.54	61.8	1.5	0.134	0.121	0.136	1.27	1.53	0.44	1	1	1	0	1	39	1	2	2	3	3	1	23.02	1	1
44296	0.61	0.142	0.173	4.24	47.7	0.46	0.023	0.137	0.035	0.32	1.59	3.76	1	0	1	1	1	73	2	2	1	2	3	2	33.43	3	0
44299	0.95	0.156	0.353	6.53	60.4	1.41	0.327	0.194	0.813	0.14	2.16	0.62	1	0	0	1	1	67	2	1	2	1	1	1	25.01	3	0
44310	0.93	0.146	1.25	4.55	50.4	0.29	0.075	0.156	0.38	0.27	0.81	1.69	1	0	0	0	1	20	1	1	2	2	3	1	23.21	3	0
44312	0.36	0.045	0.326	3.16	141	0.7	0.023	0.131	0.015	0.28	1.37	1.31	1	0	0	0	3	36	3	2	1	2	2	1	23.15	3	0
44316	2.34	0.629	0.34	6.31	69.4	1.45	0.43	0.231	0.183	0.29	2.17	2.32	1	0	0	1	1	66	2	1	1	2	2	1	34.06	2	0
44317	3.27	0.337	0.525	9.24	123	1.41	0.157	0.221	0.585	0.14	0.99	0.74	1	0	0	1	1	45	1	1	1	1	4	1	30.66	3	0
44324	0.22	0.153	0.128	3.25	46.4	0.36	0.023	0.06	0.036	0.14	2.9	3.8	0	0	0	1	1	80	2	2	3	2	2	3	24.07	3	0
44328	1.41	0.241	0.246	2.37	51.6	0.35	0.246	0.075	0.07	0.98	0.61	0.54	1	0	0	0	1	23	3	2	2	3	2	3	34.2	1	1
44333	0.13	2.31	0.364	3.66	75.7	0.54	0.121	0.144	0.312	1	2.33	0.71	0	0	0	1	1	78	1	2	1	2	3	3	18.87	2	0
44361	1.03	0.296	1.32	6.13	24.8	0.99	0.04	0.063	0.015	0.45	2.7	2.82	0	1	0	1	1	75	1	2	2	1	3	2	29.44	3	0
44382	0.83	0.26	0.341	2.58	34	0.34	0.062	0.197	0.32	0.45	0.99	0.9	1	0	0	1	1	39	1	2	2	1	4	2	40.11	3	0
44386	0.49	0.07	0.114	1.02	5.18	0.25	0.032	0.031	0.015	0.52	1.2	1.59	1	0	0	1	1	51	2	2	1	1	3	3	35.46	3	0
44393	2.74	0.132	0.33	6.3	70	0.23	0.069	0.292	0.179	0.22	0.74	1.33	1	0	0	0	1	24	1	1	3	1	3	3	21.48	3	0
44407	9.05	0.189	1.67	5.21	86.6	0.55	0.098	0.166	0.127	0.42	1.01	0.78	1	0	0	0	2	41	1	2	2	2	3	1	22.73	2	0
44410	0.59	0.522	0.163	5.29	15.4	0.59	0.023	0.161	0.015	0.37	2.16	0.97	1	0	1	1	1	65	3	2	2	2	4	3	21.44	1	0
44411	1.51	0.71	0.365	5.91	64	1.54	0.114	0.154	0.577	0.76	3.4	1.58	1	0	0	1	1	50	3	1	3	3	4	2	45.81	1	0
44412	0.8	0.164	0.898	5.14	31.3	0.24	0.023	0.127	0.104	0.54	0.62	0.2	1	0	0	0	1	34	2	2	2	1	3	2	33.17	3	0
44414	0.68	0.03	0.15	2.73	16.2	0.21	0.023	0.053	0.024	0.14	0.91	1.46	1	0	0	0	1	33	1	1	1	1	4	1	30.53	3	0
44424	3.44	0.128	0.22	2.47	14.5	0.29	0.034	0.079	0.015	0.31	1.01	0.81	1	0	0	1	1	62	2	2	1	2	4	3	37.38	3	0
44427	1.29	0.03	0.139	1.53	14.7	0.13	0.023	0.072	0.159	0.23	1.1	0.7	1	0	0	0	1	24	1	1	2	3	3	1	23.01	2	0
44431	0.63	0.302	0.297	2.61	16.7	0.5	0.023	0.069	0.057	0.94	1.5	0.47	1	0	0	1	1	47	3	2	2	2	2	1	39.62	1	1
44442	1.7	0.173	0.465	4.93	45.7	0.7	0.247	0.146	0.089	0.25	1.07	1.09	1	0	0	0	3	45	2	2	1	1	4	3	23.02	2	0
44443	2.1	0.03	0.245	3.41	75.1	0.2	0.058	0.065	0.26	0.28	0.43	1.41	1	0	0	0	1	35	3	1	3	3	2	1	28.14	2	1
44444	0.73	0.489	0.201	10.4	60.5	2.23	0.114	0.192	0.112	0.27	3.77	1.93	1	0	0	1	2	58	1	1	2	3	5	2	22.14	3	1
44446	6.12	0.77	0.598	5.93	75.2	2.57	0.088	0.235	0.348	0.88	5.89	15.9	1	0	0	0	3	48	1	1	3	2	4	2	28.63	1	0
44450	2.15	0.728	1.45	5.79	20.5	0.34	0.081	0.106	0.185	1.9	1.8	0.2	1	0	1	1	2	62	3	2	2	2	2	3	23.32	1	1
44453	4.22	0.03	1.35	6.31	89	4.36	0.2	0.229	0.225	0.29	5.2	0.55	1	0	0	0	3	42	3	2	2	3	5	1	21.2	2	0
44454	2.46	0.63	0.6	6.64	119	0.55	0.113	0.259	0.262	1.07	0.82	0.2	1	0	1	0	1	29	1	1	1	2	3	2	25.71	1	0
44460	0.49	0.119	0.122	1.9	8.75	1.29	0.023	0.037	0.121	0.31	4.65	2.9	1	1	0	1	3	75	1	2	2	3	1	3	37.07	3	0
44474	0.08	0.071	0.128	2.81	16.6	0.15	0.04	0.092	0.047	0.14	1.1	1.22	1	0	1	1	1	73	1	2	2	3	2	3	26.46	3	0
44475	0.42	0.156	0.304	4.2	48	0.99	0.076	0.113	0.207	0.14	1.32	0.82	1	1	0	0	1	44	3	1	1	3	1	1	26.46	2	0
44479	0.24	0.177	0.277	1.85	89.7	0.75	0.039	0.075	0.2	0.39	2.55	0.79	0	0	1	1	2	65	3	2	2	2	1	3	37.85	2	0
44498	0.19	1.09	0.178	2.81	36.1	0.81	0.081	0.028	0.099	1.14	2.39	0.54	1	1	0	1	3	69	2	2	2	3	4	3	34.31	2	0
44501	1.71	0.143	0.257	1.4	16.5	1.26	0.101	0.057	0.024	0.82	5.8	0.55	1	0	0	0	1	27	3	1	3	3	4	1	21.71	3	0
44513	2.62	0.163	0.304	10.1	30	0.43	0.085	0.253	0.12	0.22	0.72	1.83	1	0	1	0	1	33	1	1	2	1	1	1	29.58	3	0
44514	1.07	0.347	0.214	8.4	32.1	0.87	0.023	0.209	0.227	0.21	2.52	9.89	1	0	0	0	1	58	1	2	2	1	3	1	24.44	3	0
44517	2.13	0.315	0.504	9.33	107	0.91	0.09	0.215	0.214	0.25	1.69	1.3	1	1	1	1	1	61	1	1	3	1	3	3	32.31	3	0
44533	1.81	0.03	0.078	0.707	5.25	0.07	0.023	0.029	0.015	0.14	0.63	0.93	1	0	0	1	1	41	1	2	1	1	4	3	27.76	3	0
44540	0.63	0.244	0.378	6.02	98.7	1.99	0.061	0.222	0.051	0.84	0.85	0.2	1	0	0	0	3	36	1	1	1	1	1	1	25.31	2	0
44565	0.24	0.167	0.126	1.81	11.9	0.07	0.023	0.06	0.031	0.27	0.86	0.85	1	0	0	0	3	23	1	2	2	3	5	3	16.3	3	0
44570	2.09	0.14	0.257	1.3	40.2	0.19	0.034	0.047	0.086	0.28	0.93	1.29	1	0	0	0	1	38	1	2	2	3	1	2	27.8	3	0
44576	1.1	0.738	0.223	4.33	48.2	0.89	0.049	0.199	0.455	0.37	1.55	0.2	1	0	0	0	1	45	3	2	1	2	1	3	31.66	3	1
44578	0.97	1.66	0.324	5.13	74.3	1.05	0.07	0.222	0.271	0.69	1.91	1.11	1	0	1	1	1	53	2	1	2	1	3	3	26.13	1	0
44579	0.39	1.8	0.195	3.82	50.5	1.36	0.158	0.125	0.505	0.65	5.68	0.82	1	1	1	1	1	59	2	1	3	3	4	2	26.09	3	1
44589	0.59	0.294	0.261	2.86	27.4	0.32	0.068	0.16	0.031	0.23	0.62	1.36	1	0	0	1	1	37	2	2	1	2	1	3	35.52	3	0
44594	1.52	0.335	0.27	6.1	39	0.93	0.068	0.449	0.116	0.25	1.06	1.91	0	0	0	1	3	80	2	2	1	2	3	2	24.89	2	0
44603	2.04	0.586	1.43	1.99	11.5	0.29	0.035	0.09	0.082	2.21	3.61	2.77	1	1	1	1	1	52	3	2	1	3	4	2	30.93	1	0
44620	2.39	0.381	1.15	9.45	147	0.54	0.257	0.295	0.287	0.14	0.61	1.19	1	0	0	0	1	31	1	2	1	2	1	3	21.16	3	0
44633	1.1	0.924	0.366	5.43	150	0.5	0.337	0.097	0.136	0.3	0.77	0.91	1	0	1	0	3	60	1	1	1	1	3	3	27.49	3	0
44636	0.62	0.759	0.473	9.36	126	0.33	0.075	0.285	0.126	0.14	0.83	1.34	1	0	0	0	2	48	1	1	1	1	4	2	21.81	3	0
44638	5.9	0.125	0.585	3.8	26.9	0.44	0.053	0.243	0.186	0.43	1.22	1.52	1	0	0	0	1	27	3	1	3	2	4	1	30.11	3	0
44659	2.09	0.221	0.178	6.53	25.9	0.63	0.051	0.156	0.331	0.2	1.19	4.9	1	0	0	1	2	48	1	1	2	1	4	1	28.15	2	0
44661	2.68	0.95	0.613	7.72	104	2.33	0.226	0.158	0.192	0.4	2.49	0.2	1	0	0	0	3	60	1	2	1	3	3	3	34.2	3	1
44669	1.4	1.05	1.02	7.91	33.2	1.44	0.066	0.311	0.039	0.51	3	0.2	1	0	0	1	3	76	1	2	2	2	3	3	30.04	3	0
44671	5.44	0.191	0.434	4.92	38.8	0.65	0.074	0.086	0.103	0.3	2.09	1.98	1	0	0	0	1	48	1	1	1	1	4	1	28.47	2	0
44688	0.35	0.247	0.267	3.42	8.31	0.87	0.065	0.083	0.031	0.39	2.8	1.65	1	0	0	1	2	80	2	1	2	3	2	2	18.41	3	0
44701	1.67	0.542	0.351	6.9	55.6	0.88	0.046	0.216	0.18	0.53	2.21	1.35	1	0	0	0	1	44	2	1	1	3	3	1	23.94	1	0
44726	1.09	0.349	0.302	6.71	95.6	0.69	0.088	0.17	0.05	0.14	0.99	1.92	1	0	0	1	1	34	2	1	1	2	1	1	30.56	3	0
44731	1.15	0.402	0.376	3.83	33.5	0.34	0.035	0.146	0.046	0.33	0.78	1.65	1	0	0	0	3	60	1	2	2	2	2	3	29.95	3	1
44734	1.41	0.287	0.463	6.33	110	0.91	0.194	0.478	0.185	0.34	1.1	0.2	1	0	0	0	1	29	3	1	2	1	1	3	32.38	3	0
44735	1.91	0.079	0.358	4.62	130	0.3	0.129	0.105	0.34	0.14	0.45	0.33	1	0	1	1	3	33	2	1	1	2	3	1	24.12	3	0
44738	0.92	0.253	0.338	9.35	93.6	0.56	0.08	0.282	0.069	0.14	0.85	1.19	1	0	1	0	1	52	2	1	1	2	2	2	29.38	3	0
44763	0.62	0.093	0.387	4.01	117	0.98	0.053	0.094	0.201	0.14	2.7	2.33	0	0	0	0	1	68	1	2	2	1	3	2	21.77	3	0
44765	0.47	0.03	0.086	0.897	14.3	0.13	0.023	0.034	0.015	0.21	0.84	0.98	1	0	0	0	3	39	2	2	1	2	1	3	22.27	3	0
44767	3.11	0.102	0.64	8.6	81.2	0.4	0.051	0.161	0.163	0.14	0.64	0.53	1	0	0	0	1	38	1	1	1	2	3	2	23.23	2	0
44771	0.76	0.108	0.134	1.91	19.5	0.89	0.023	0.06	0.015	0.62	6.6	1.1	0	0	0	1	1	78	2	2	1	1	3	2	36.21	2	0
44778	1.94	0.477	0.469	2.8	27.7	0.5	0.033	0.123	0.054	0.66	1.67	0.72	1	0	0	0	1	53	2	2	1	3	3	3	29.25	3	0
44780	7.62	0.162	0.814	8.19	70.1	0.72	0.083	0.376	0.128	0.49	0.6	1.39	1	0	0	0	3	49	2	2	1	1	3	2	42.18	3	0
44785	0.46	0.305	0.207	4.5	15.5	0.34	0.044	0.505	0.038	0.44	1.2	0.2	1	0	0	0	2	46	1	1	1	1	4	2	32.87	3	0
44795	0.84	0.03	0.085	0.937	7.12	0.24	0.023	0.026	0.015	0.29	2.73	1.29	1	0	0	1	3	61	1	1	1	2	3	3	34.76	3	0
44817	0.41	0.162	0.123	3.93	19.6	0.46	0.023	0.11	0.03	0.35	1.55	1.34	1	0	0	1	1	70	1	2	1	1	2	2	24.15	3	0
44818	8.93	0.529	5.03	10.5	28.9	1.01	0.082	0.758	0.148	1.73	2.22	0.95	1	0	0	1	1	41	3	2	2	3	4	2	35.25	1	0
44839	0.43	0.442	0.129	3.94	50.2	0.15	0.023	0.091	0.119	1.24	1.6	8.69	1	1	1	1	3	75	3	2	2	2	5	3	30.42	3	0
44848	8	0.108	0.51	3.52	251	0.75	0.051	0.115	0.186	0.22	1.43	0.47	1	0	0	0	1	40	3	1	1	2	1	1	30.25	3	0
44849	0.79	0.086	0.502	4.48	53.2	0.85	0.09	0.296	0.063	0.14	1.2	0.83	1	0	0	0	1	34	1	2	2	2	4	2	24.16	3	0
44855	1.75	0.12	0.332	4.47	17.2	0.26	0.023	0.102	0.043	0.38	1.22	2.32	1	0	1	1	1	64	1	2	2	2	3	1	33.93	3	0
44867	1.52	0.999	0.812	8.95	78.3	0.64	0.063	0.403	0.096	0.55	1.09	0.77	1	0	0	0	1	29	1	2	1	1	3	1	30.89	3	1
44869	4.04	1.58	1.84	17.7	49.4	0.57	0.071	0.365	0.065	0.79	0.76	0.5	1	0	0	1	3	45	2	2	1	3	3	2	29.53	1	0
44870	1.29	0.448	0.23	2	19.6	0.24	0.023	0.133	0.024	0.66	1.9	3.15	1	0	0	1	1	62	2	2	1	2	3	2	26.94	3	0
44875	2.84	0.617	1.3	7.24	47.8	0.87	0.093	0.235	0.182	1.82	1.29	0.58	1	0	0	0	1	31	1	2	2	2	4	1	44.59	1	0
44885	0.57	0.129	0.325	4.62	61.9	0.38	0.054	0.286	0.026	0.23	1.2	0.42	1	0	0	1	1	65	2	2	2	1	3	2	30.19	3	0
44891	1	0.35	0.228	8.18	53.3	0.66	0.023	0.206	0.157	0.24	1.49	2.2	1	0	0	0	2	50	1	2	2	1	3	1	35.62	2	0
44893	1.63	0.214	1.2	9.39	40.6	0.52	0.063	0.316	0.043	0.52	0.85	0.82	1	0	0	1	1	44	1	2	2	3	3	2	33.11	2	1
44905	0.33	0.16	0.213	2.6	36.7	0.11	0.023	0.068	0.161	0.34	0.66	0.56	0	1	0	1	3	74	1	2	2	2	3	3	22.96	3	0
44906	5.68	0.753	0.414	8.44	206	1.48	0.052	0.303	0.093	0.4	2.37	2.57	1	1	0	1	2	70	2	1	1	1	3	1	30.03	2	0
44909	2.13	0.042	0.313	3.69	68.2	0.14	0.083	0.1	0.23	0.14	0.44	0.4	1	0	0	0	3	22	2	2	1	2	3	2	33.28	3	0
44910	0.63	0.223	0.533	4.04	245	2.42	0.222	0.14	1.141	0.28	2	0.78	1	0	0	1	1	62	3	1	1	2	1	3	24.26	3	0
44920	1.37	0.396	0.605	4.56	41.1	1.94	0.054	0.127	0.1	0.46	2.2	2.37	1	0	0	1	3	80	2	2	2	3	4	2	23.92	2	0
44931	1.36	0.141	0.488	4.78	62.8	0.36	0.062	0.23	0.171	0.14	1.04	2.1	1	0	0	0	1	28	2	1	3	2	1	3	31.7	3	0
44934	0.89	0.319	0.176	2.81	10.5	0.26	0.057	0.04	0.049	1.13	2.04	0.2	1	0	1	1	2	50	1	2	1	3	3	3	29.23	1	1
44941	0.77	0.449	0.282	6.23	44.9	0.74	0.06	0.171	0.143	0.33	1.32	0.74	1	0	0	1	3	64	1	2	1	1	3	2	23.87	3	0
44953	0.77	0.252	0.897	3.78	41.2	0.3	0.062	0.14	0.039	0.38	0.88	1.22	1	0	0	1	1	27	1	2	2	2	4	1	26.4	3	0
44972	3.93	0.456	0.942	7.26	65.8	0.84	0.226	0.237	0.189	0.26	1.61	1.42	1	1	0	1	1	44	1	1	1	2	4	1	34.38	3	0
44973	1.46	0.058	0.22	2	10.6	0.23	0.023	0.237	0.015	0.42	2.66	0.59	1	0	0	0	1	47	3	2	3	3	1	1	28.35	3	0
44980	2.27	1.03	0.734	12.6	286	2.02	0.091	0.245	0.077	0.34	3	2.83	1	1	0	1	2	76	1	1	1	2	3	2	36.53	2	1
44984	0.59	0.346	0.274	4.57	74.9	0.27	0.033	0.093	0.113	0.14	0.44	0.2	1	0	1	1	3	80	2	2	2	3	2	3	17.8	3	0
44988	4.89	0.498	1.05	7.01	9.22	1.69	0.114	0.166	0.117	0.31	3	0.53	1	1	0	1	1	79	1	1	1	2	3	1	27.35	2	0
44991	0.08	0.03	0.074	0.807	36.7	0.1	0.063	0.038	0.224	0.14	0.7	0.37	1	0	0	0	3	30	2	1	2	3	4	3	20.46	3	0
44996	1.93	0.26	0.457	5.61	55.4	0.47	0.064	0.198	0.156	0.14	0.84	1.52	1	0	0	0	1	41	2	2	1	2	2	2	31.28	2	0
[truncated: 6,815 more rows]
